# Supplementary material
Source: PubMed Central journal article supplement (PMC8531995)
Supplement: jamaoncol-e212915-s001.pdf [file jamaoncol-e212915-s001.pdf]

**Studio CAVE (Cetuximab-AVElumab) mCRC**

1  
2  
3  
4  
5  
6  
7  
8  
9  
10  
11  
12  
13  
14  
15  
16  
17  
18  
19  
20  
21  
22  
23  
24  
25  
26  
27  
28  
29  
30  
31  
32  
33  
34  
35  
36  
37  
38  
39  
40  
41  
42  
43  
44  
45  
46  
47  
48

**Clinical Trial Protocol MS 100070-0028**

**Title: CAVE (Cetuximab-AVElumab) mCRC: A single arm phase II clinical study of the combination of avelumab plus cetuximab in pre-treated RAS wild type metastatic colorectal cancer patients.**

**Short Trial Name: CAVE mCRC**

**EudraCT Number 2017-004392-32**

**Coordinating Investigator: Fortunato Ciardiello**

**Sponsor: Dipartimento di internistica clinica e sperimentale "Flaviano Magrassi" Università degli studi della Campania "Luigi Vanvitelli"**

**Table of Contents**

**Table of Contents**

**Table of Tables**

**Table of Figures**

**List of Abbreviations**

|                |                                                                                         |
|----------------|-----------------------------------------------------------------------------------------|
| <b>1</b>       | <b>Synopsis</b>                                                                         |
| <b>2</b>       | <b>Sponsor, Investigators, and Trial Administrative Structure</b>                       |
| <b>2.1</b>     | <b>Investigational Sites</b>                                                            |
| <b>3</b>       | <b>Background Information</b>                                                           |
| <b>3.1</b>     | <b>Metastatic colorectal cancer</b>                                                     |
| <b>3.2</b>     | <b>Avelumab</b>                                                                         |
| <b>3.3</b>     | <b>Cetuximab</b>                                                                        |
| <b>3.4</b>     | <b>Epidermal growth factor receptor</b>                                                 |
| <b>3.5</b>     | <b>Cetuximab general safety information</b>                                             |
| <b>4</b>       | <b>Trial Objectives</b>                                                                 |
| <b>4.1</b>     | <b>Primary objective</b>                                                                |
| <b>4.2</b>     | <b>Secondary objectives</b>                                                             |
| <b>4.3</b>     | <b>Exploratory objectives</b>                                                           |
| <b>4.4</b>     | <b>Exploratory endpoints</b>                                                            |
| <b>5</b>       | <b>Investigational Plan</b>                                                             |
| <b>5.2</b>     | <b>Overall Trial Design and Plan</b>                                                    |
| <b>5.2.1</b>   | <b>Trial Endpoints</b>                                                                  |
| <b>5.2.2</b>   | <b>Secondary Endpoints and Exploratory Endpoints</b>                                    |
| <b>5.3</b>     | <b>Trial Medication Administration and Schedule</b>                                     |
| <b>5.3.1</b>   | <b>Avelumab</b>                                                                         |
| <b>5.3.2</b>   | <b>Cetuximab</b>                                                                        |
| <b>5.4</b>     | <b>Dose Modification and Adverse Drug Reactions Requiring Treatment Discontinuation</b> |
| <b>5.4.1</b>   | <b>Dose Modification for Avelumab</b>                                                   |
| <b>5.4.1.2</b> | <b>Adverse Drug Reactions Requiring Avelumab Discontinuation or Modification</b>        |
| <b>5.4.1.3</b> | <b>Infusion-Related Reactions</b>                                                       |
| <b>5.4.1.4</b> | <b>Severe Hypersensitivity Reactions and Flu-Like Symptoms</b>                          |
| <b>5.4.1.5</b> | <b>Tumor Lysis Syndrome</b>                                                             |
| <b>5.4.1.6</b> | <b>Immune-Related Adverse Events</b>                                                    |
| <b>5.4.2</b>   | <b>Dose Modification and Discontinuation for Cetuximab</b>                              |

## **Studio CAVE (Cetuximab-AVElumab) mCRC**

- 5.4.2.1 Adverse Drug Reactions Requiring Cetuximab Discontinuation or Modification**
- 5.4.2.2 Skin Toxicity**
- 5.4.2.3 Allergic/Hypersensitivity Reactions**
- 5.4.2.4 Infusion-Related Reactions**
- 5.4.2.5 Other Considerations**
- 5.5 Selection of Trial Population**
  - 5.5.1 Inclusion and Exclusion Criteria**
- 5.6 Criteria for Subject Withdrawal**
  - 5.6.1 Criteria for Withdrawal from Trial Treatment**
  - 5.6.2 Withdrawal from the Trial**
- 5.7 Premature Discontinuation of the Trial**
- 5.8 Definition of End of Trial**
- 6 Investigational Medicinal Product and Other Drugs Used in the Trial**
  - 6.1 Description of Investigational Medicinal Product**
    - 6.1.1 Avelumab**
    - 6.1.2 Cetuximab**
  - 6.2 Dosage and Administration**
    - 6.2.1 Avelumab Dosage and Administration**
    - 6.2.2 Cetuximab Dosage and Administration**
  - 6.3 Other Drugs to be Used in the Trial**
  - 6.4 Concomitant Medications and Therapies**
    - 6.4.1 Permitted Medicines**
    - 6.4.2 Nonpermitted Medicines**
    - 6.4.3 Other Considerations**
  - 6.5 Investigational Medicinal Products Formulation, Packaging and Storage**
    - 6.5.1 Avelumab**
    - 6.5.2 Cetuximab**
  - 6.6 Investigational Medicinal Product Accountability**
  - 6.7 Assessment of Investigational Medicinal Product Compliance**
  - 6.8 Treatment of Overdose**
  - 6.9 Medical Care of Subjects After End of Treatment**
- 7 Trial Procedures and Assessments**
  - 7.1 Screening and Baseline Procedures and Assessments**
  - 7.2 Treatment Period**

## **Studio CAVE (Cetuximab-AVElumab) mCRC**

- 7.3 End of Treatment**
- 7.4 Safety Follow-up**
- 7.5 Long-term Follow-up**
- 7.6 Demographic and Other Baseline Characteristics**
  - 7.6.1 Demographic Data**
  - 7.6.2 Diagnosis of mCRC**
  - 7.6.3 Medical History**
  - 7.6.4 Vital Signs and Physical Examination**
  - 7.6.5 CT or MRI Scans for Tumor Assessment at Baseline**
  - 7.6.6 Cardiac Assessments**
  - 7.6.7 Ophthalmologic Assessment**
  - 7.6.8 Clinical Laboratory Tests**
- 7.7 Assessment of Efficacy**
- 7.8 Assessment of Safety**
- 7.9 Adverse Events**
  - 7.9.1 Adverse Event Definitions**
  - 7.9.2 Methods of Recording and Assessing Adverse Events**
  - 7.9.3 Definition of the Adverse Event Reporting Period**
  - 7.9.4 Procedure for Reporting Serious Adverse Events**
  - 7.9.5 Safety Reporting to Health Authorities, Independent Ethics Committees/Institutional Review Boards and Investigators**
  - 7.9.6 Monitoring of Subjects with Adverse Events**
- 7.10 Pregnancy and In Utero Drug Exposure**
- 7.11 Clinical laboratory assessments**
- 7.12 Vital Signs, Physical Examination and Other Assessment**
- 8.1 Primary Endpoint**
- 8.2 Secondary Endpoints**
  - 8.2.1 Progression-Free Survival**
  - 8.2.2 Overall response rate (ORR)**
  - 8.2.3 Safety Endpoints**
- 8.3 Description of Statistical Analyses**
  - 8.3.1 General Considerations**
  - 8.3.2 Analysis of Primary Endpoint**
  - 8.3.3 Analysis of Secondary Endpoints**
- 9 Ethical and Regulatory Aspects**
  - 9.1 Responsibilities of the Investigator**
  - 9.2 Subject Information and Informed Consent**

## **Studio CAVE (Cetuximab-AVElumab) mCRC**

|                    |                                                                            |
|--------------------|----------------------------------------------------------------------------|
| <b>9.3</b>         | <b>Subject Identification and Privacy</b>                                  |
| <b>9.4</b>         | <b>Emergency Medical Support and Subject Card</b>                          |
| <b>9.5</b>         | <b>Clinical Trial Insurance and Compensation to Subjects</b>               |
| <b>9.6</b>         | <b>Independent Ethics Committee or Institutional Review Board</b>          |
| <b>9.7</b>         | <b>Health Authorities</b>                                                  |
| <b>10</b>          | <b>Trial Management</b>                                                    |
| <b>10.1</b>        | <b>Case Report Form Handling</b>                                           |
| <b>10.2</b>        | <b>Source Data and Subject Files</b>                                       |
| <b>10.3</b>        | <b>Investigator Site File and Archiving</b>                                |
| <b>10.4</b>        | <b>Monitoring, Quality Assurance, and Inspection by Health Authorities</b> |
| <b>10.5</b>        | <b>Changes to the Clinical Trial Protocol</b>                              |
| <b>10.6</b>        | <b>Clinical Trial Report and Publication Policy</b>                        |
| <b>10.6.1</b>      | <b>Clinical Trial Report</b>                                               |
| <b>10.6.2</b>      | <b>Publication</b>                                                         |
| <b>11</b>          | <b>References</b>                                                          |
| <b>12</b>          | <b>Appendices</b>                                                          |
| <b>Appendix I</b>  | <b>Schedules of Assessments</b>                                            |
| <b>Appendix II</b> | <b>Eastern Cooperative Oncology Group Performance Status</b>               |

## **Table of Tables**

|                |                                                                                             |
|----------------|---------------------------------------------------------------------------------------------|
| <b>Table 1</b> | <b>Most Frequently Reported Treatment-related TEAEs During Dose Expansion</b>               |
| <b>Table 2</b> | <b>Prevalence of EGFR expression in common tumour types</b>                                 |
| <b>Table 3</b> | <b>Treatment Modification for Symptoms of Infusion-Related Reactions Caused by Avelumab</b> |
| <b>Table 4</b> | <b>Management of Immune-mediated Adverse Reactions</b>                                      |
| <b>Table 5</b> | <b>Treatment adjustment for Cetuximab caused Allergic/Hypersensitivity Reaction</b>         |
| <b>Table 6</b> | <b>Required Full Laboratory Safety Tests</b>                                                |
| <b>Table 7</b> | <b>Screening/Baseline, Treatment Phase and Follow-up procedures</b>                         |

**Table of Figure**

**Figure 1                      Assessment and Initial Management of Tumor Lysis Syndrome**

**Figure 2                      Treatment adjustment in case of Grade 3 skin toxicity considered to be related to Cetuximab**

49  
50  
51  
52  
53  
54  
55  
56  
57  
58  
59  
60  
61  
62  
63  
64  
65  
66  
67  
68  
69  
70  
71  
72  
73  
74  
75  
76  
77  
78  
79  
80  
81  
82  
83  
84  
85  
86

**Studio CAVE (Cetuximab-AVElumab) mCRC**

87  
88  
89  
90  
91  
92  
93  
94  
95  
96  
97  
98  
99  
100  
101  
102  
103  
104  
105  
106  
107  
108  
109  
110  
111  
112  
113  
114  
115  
116  
117  
118  
119  
120  
121  
122  
123  
124  
125  
126  
127  
128  
129  
130  
131  
132  
133  
134

**List of abbreviations**

## Studio CAVE (Cetuximab-AVElumab) mCRC

135  
136  
137  
138  
139

### 1. Synopsis

|                                                                 |                                                                                                                                                                                                                                                                                                                                                                                                                                                                                                                                                                                                                                                                                                                                                                                                                                                                                                                                                                                                                                                                                                                                                                                   |
|-----------------------------------------------------------------|-----------------------------------------------------------------------------------------------------------------------------------------------------------------------------------------------------------------------------------------------------------------------------------------------------------------------------------------------------------------------------------------------------------------------------------------------------------------------------------------------------------------------------------------------------------------------------------------------------------------------------------------------------------------------------------------------------------------------------------------------------------------------------------------------------------------------------------------------------------------------------------------------------------------------------------------------------------------------------------------------------------------------------------------------------------------------------------------------------------------------------------------------------------------------------------|
| <b>Title</b>                                                    | CAVE (Cetuximab-AVElumab) mCRC: A single arm phase II clinical study of the combination of avelumab plus cetuximab in pre-treated RAS wild type metastatic colorectal cancer patients.                                                                                                                                                                                                                                                                                                                                                                                                                                                                                                                                                                                                                                                                                                                                                                                                                                                                                                                                                                                            |
| <b>Short name trial</b>                                         | CAVE mCRC                                                                                                                                                                                                                                                                                                                                                                                                                                                                                                                                                                                                                                                                                                                                                                                                                                                                                                                                                                                                                                                                                                                                                                         |
| <b>EudraCTnumber</b>                                            | 2017-004392-32                                                                                                                                                                                                                                                                                                                                                                                                                                                                                                                                                                                                                                                                                                                                                                                                                                                                                                                                                                                                                                                                                                                                                                    |
| <b>Sponsor</b>                                                  | Dipartimento di internistica clinica e sperimentale "Flaviano Magrassi"<br>Università degli studi della Campania "Luigi Vanvitelli"                                                                                                                                                                                                                                                                                                                                                                                                                                                                                                                                                                                                                                                                                                                                                                                                                                                                                                                                                                                                                                               |
| <b>Phase</b>                                                    | Phase II                                                                                                                                                                                                                                                                                                                                                                                                                                                                                                                                                                                                                                                                                                                                                                                                                                                                                                                                                                                                                                                                                                                                                                          |
| <b>Trial Centers/Countries</b>                                  | The study will be conducted in nine centers in Italy<br><br><ol style="list-style-type: none"> <li>1. Oncologia Medica, Università degli Studi della Campania "L. Vanvitelli", PI: Prof. Fortunato Ciardiello</li> <li>2. Oncologia Medica, Istituto Nazionale per lo Studio e la Cura dei Tumori "Fondazione Giovanni Pascale" – IRCCS, Napoli, PI: Dr Antonio Avallone.</li> <li>3. Oncologia Medica, Azienda Ospedaliera Universitaria, Università di Pisa. PI: Prof Alfredo Falcone</li> <li>4. Oncologia Medica, Ospedale Casa Sollievo della Sofferenza - San Giovanni Rotondo (FG). PI: Dr Evaristo Maiello</li> <li>5. Oncologia Medica, Nuovo Ospedale Garibaldi, Nesima, Catania. PI: Dr Roberto Bordonaro</li> <li>6. Oncologia Medica, Campus Biomedico, Roma. PI: Prof Daniele Santini</li> <li>7. Oncologia Medica, ASL Pescara. PI: Dr Carlo Garufi</li> <li>8. Oncologia Medica, Istituto Nazionale dei Tumori di Milano. PI: Prof Filippo De Braud</li> <li>9. Oncologia Medica, IRCCS Santa Maria Nuova. PI: Dr Carmine Pinto</li> <li>10. Onco-Ematologia, Azienda Ospedaliera di Rilievo Nazionale "S.G. Moscati" Avellino. PI: Dr Gridelli Cesare</li> </ol> |
| <b>Planned Trial period (first enrollment-last subject out)</b> | 36 months                                                                                                                                                                                                                                                                                                                                                                                                                                                                                                                                                                                                                                                                                                                                                                                                                                                                                                                                                                                                                                                                                                                                                                         |
| <b>Trial objectives</b>                                         | The primary objective of the study is to evaluate the efficacy (OS) of avelumab and cetuximab combined in pre-treated RAS wild type metastatic colorectal cancer patients                                                                                                                                                                                                                                                                                                                                                                                                                                                                                                                                                                                                                                                                                                                                                                                                                                                                                                                                                                                                         |



## Studio CAVE (Cetuximab-AVElumab) mCRC

|                                                  |                                                                                                                                                                                                                                                                                                                                                                                                                                                                                                                                                                                                                                                                                                                                                                                                                                                                                                                                                                                                                                                                                                                         |
|--------------------------------------------------|-------------------------------------------------------------------------------------------------------------------------------------------------------------------------------------------------------------------------------------------------------------------------------------------------------------------------------------------------------------------------------------------------------------------------------------------------------------------------------------------------------------------------------------------------------------------------------------------------------------------------------------------------------------------------------------------------------------------------------------------------------------------------------------------------------------------------------------------------------------------------------------------------------------------------------------------------------------------------------------------------------------------------------------------------------------------------------------------------------------------------|
|                                                  | <p>Secondary objective will be:</p> <ul style="list-style-type: none"> <li>• To demonstrate superiority with regard to the objective response rate (ORR) of avelumab and cetuximab combined in pre-treated RAS wild type metastatic colorectal cancer patients.</li> <li>• To demonstrate superiority with regard to progression free survival (PFS) of avelumab and cetuximab combined in pre-treated RAS wild type metastatic colorectal cancer patients.</li> <li>• To determine the safety and tolerability of avelumab and cetuximab combined in pre-treated RAS wild type metastatic colorectal cancer patients.</li> </ul>                                                                                                                                                                                                                                                                                                                                                                                                                                                                                       |
| <p><b>Trial design and plan</b></p>              | <p>This is a non-profit phase II, open-label, single-arm study of cetuximab plus avelumab in patients with RAS WT mCRC treated in first line with chemotherapy in combination with an anti-EGFR drug that have had a clinical benefit (complete or partial response) from treatment.</p> <p>Tumor measurements by computed tomography (CT) scan or magnetic resonance imaging (MRI) will be performed every 8 weeks from the beginning of treatment to determine response to treatment. Response will be evaluated using the Response Evaluation Criteria in Solid Tumors version 1.1 (RECIST 1.1).</p> <p>Treatment will continue until disease progression, significant clinical deterioration, unacceptable toxicity, any criterion for withdrawal from the trial or trial drug is fulfilled. Treatment may continue past the initial determination of disease progression per RECIST 1.1 if the subject's performance status has remained stable, and if in the opinion of the Investigator, the subject will benefit from continued treatment and if other criteria are fulfilled as outlined in the protocol.</p> |
| <p><b>Planned number of subjects</b></p>         | <p>75 patients</p>                                                                                                                                                                                                                                                                                                                                                                                                                                                                                                                                                                                                                                                                                                                                                                                                                                                                                                                                                                                                                                                                                                      |
| <p><b>Schedule of visits and assessments</b></p> | <p><b>Screening/Baseline Assessments (day -28 from starting treatment)</b></p> <p><u>Screening procedures will include the following:</u></p> <ul style="list-style-type: none"> <li>- Signing of the informed consent</li> <li>- Collection of tumor tissue when available. Tumor tissue can be archival or resulting from a screening biopsy of the subject if no archival tissue is available (biopsies are only to be obtained from safely accessible tumor tissue/sites).</li> <li>- Recording of the demographic information, complete medical history, and baseline medical condition</li> <li>- A physical examination including vital signs, body weight, and height, 12-lead electrocardiogram (ECG), and a determination of the Eastern Cooperative Oncology Group Performance Status (ECOG PS)</li> </ul>                                                                                                                                                                                                                                                                                                   |

## Studio CAVE (Cetuximab-AVElumab) mCRC

- Ophthalmological assessment
- AE and concomitant medication assessments
- Safety laboratory assessments including free T4 and TSH
- Tumor evaluation by CT scan or MRI (a bone scan should be done at Screening as clinically indicated)
- Serum  $\beta$ -human chorionic gonadotropin ( $\beta$ -HCG) pregnancy test for females of childbearing potential
- Blood samples for hepatitis B virus (HBV) and hepatitis C virus (HCV) testing (local laboratory)

### Treatment phase

Treatment phase begins the day of first infusion and ends when a decision is made to stop the trial drugs by the Investigator or when consent is withdrawn by the subject.

Visits will take place every week (-1/+1 days)

### The main assessments are as follows:

- Tumor responses will be assessed every 8 weeks from starting treatment, per RECIST 1.1 while on trial.
- Vital signs will be collected prior to each trial drugs administration. Administration of trial drugs will take place only after relevant results have been checked by a medically qualified person.
- Blood chemistry and hematology assessments: must be performed at baseline, every two weeks prior to each avelumabplus cetuximab dose, at end of treatment visit and at 30 days post-treatment safety follow-up.
- Urine pregnancy test for women of childbearing potential must be performed at baseline and least every month during treatment.
- Free T4 and TSH must be performed at baseline and at least every 8 weeks during treatment and at end of treatment or 30 days post-treatment safety follow-up (if not performed in the previous 8 weeks).
- AEs and concomitant medications will be documented at each visit

Avelumab treatment will be administered by IV infusion once everytwo weeks whereas cetuximab treatment will be administrated by IV infusion once everyweekuntil disease progression, significant clinical deterioration (clinical progression), discontinuation for unacceptable toxicity, or withdrawal of consent.

Note: Treatment may continue past the initial determination of disease progression per RECIST 1.1 if the subject's ECOG PS has remained stable, and if in the opinion of the Investigator, the subject will benefit from continued treatment and if other

criteria are fulfilled as outlined in the protocol, that is, no new symptoms or worsening of existing symptoms and no decrease in performance score.

Extended safety follow-up

- Given the potential risk for delayed immune-related toxicities, safety follow-up must be performed up to 90 days after the last dose of avelumab administration.
- The extended safety follow-up beyond 30 days after last avelumab administration may be performed either via a site visit or via a telephone call with subsequent site visit requested in case any concerns noted during the telephone call.

Discontinuation visit

Any subject who experiences an AE that mandates discontinuation of trial treatment should have a Discontinuation visit within 7 days of the decision to discontinue trial treatment.

Follow-up phase

The Follow-up phase starts when the decision has been made to stop trial drug treatment.

Subjects will have

- an End-of-Treatment visit at 28 days ( $\pm$  5 days) after the last administration of trial treatment or before the start of any other antineoplastic therapy, and
- a Safety Follow-up visit 12 weeks ( $\pm$  2 weeks) after the last administration of trial treatment.

After the End-of-Treatment visit only treatment related AEs have to be documented until the Safety Follow-up visit, defined as 12 weeks ( $\pm$  2 weeks) after the last trial treatment administration.

Subjects with a serious AE (SAE) ongoing at the Safety follow-up visit must be followed up by the Investigator until stabilization or until outcome is known, unless the subject is documented as “lost to follow-up.”

Subjects who discontinue the trial treatment for reasons other than disease progression according to RECIST 1.1 will be followed up every 6 weeks ( $\pm$  5 days) for radiographic assessment until disease progression, lost to follow-up, or withdrawal of informed consent.

**Studio CAVE (Cetuximab-AVElumab) mCRC**

|                                                                   |                                                                                                                                                                                                                                                                                                                                                                                                                                                                                                                                                                                                                                                                                                                                                                                                                                                                                                                                                                                                                                                                                                                                                                                                                                                                                                                                                                                                                                                                                                                                                                                                                                                                                                                                                                                                                                                                                                                                                                                                                                                                                                                                                                                                                                                                                                                                                                    |
|-------------------------------------------------------------------|--------------------------------------------------------------------------------------------------------------------------------------------------------------------------------------------------------------------------------------------------------------------------------------------------------------------------------------------------------------------------------------------------------------------------------------------------------------------------------------------------------------------------------------------------------------------------------------------------------------------------------------------------------------------------------------------------------------------------------------------------------------------------------------------------------------------------------------------------------------------------------------------------------------------------------------------------------------------------------------------------------------------------------------------------------------------------------------------------------------------------------------------------------------------------------------------------------------------------------------------------------------------------------------------------------------------------------------------------------------------------------------------------------------------------------------------------------------------------------------------------------------------------------------------------------------------------------------------------------------------------------------------------------------------------------------------------------------------------------------------------------------------------------------------------------------------------------------------------------------------------------------------------------------------------------------------------------------------------------------------------------------------------------------------------------------------------------------------------------------------------------------------------------------------------------------------------------------------------------------------------------------------------------------------------------------------------------------------------------------------|
|                                                                   | <p>After the End-of-Treatment visit, subjects will be followed quarterly (that is, every 3 months ± 1 week) for survival (including assessment of any further tumor therapy). The survival follow-up will continue a maximum of 2 years after the last subject receives the last dose of avelumab and cetuximab. Subject-reported outcomes questionnaires will be assessed at the Early Discontinuation/End-of-Treatment visit.</p>                                                                                                                                                                                                                                                                                                                                                                                                                                                                                                                                                                                                                                                                                                                                                                                                                                                                                                                                                                                                                                                                                                                                                                                                                                                                                                                                                                                                                                                                                                                                                                                                                                                                                                                                                                                                                                                                                                                                |
| <p><b>Diagnosis and main inclusion and exclusion criteria</b></p> | <p><b>Inclusion Criteria</b></p> <p>For inclusion in the trial, all of the following inclusion criteria must be fulfilled:</p> <ol style="list-style-type: none"> <li>1. Signed written informed consent before any trial-related procedure is undertaken that is not part of the standard patient management</li> <li>2. Male or female subjects aged ≥ 18 years</li> <li>3. Histologically proven diagnosis of colorectal adenocarcinoma.</li> <li>4. Diagnosis of metastatic disease</li> <li>5. RAS (NRAS and KRAS exon 2,3 and 4) wild-type in tissue at initial diagnosis.</li> <li>6. Efficacy of a first line therapy containing an anti-EGFR agent (panitumumab or cetuximab) with a major response achieved (complete or partial response).</li> <li>7. A second line therapy.</li> <li>8. More than 4 months from last dose of anti-EGFR agent administered in first line treatment before randomization.</li> <li>9. Measurable disease according to RECIST criteria v1.1</li> <li>10. ECOG PS of 0 to 1 at trial entry</li> <li>11. Estimated life expectancy of more than 12 weeks</li> <li>12. Adequate hematological function defined by white blood cell (WBC) count ≥ 2.5 × 10<sup>9</sup>/L with absolute neutrophil count (ANC) ≥ 1.5 × 10<sup>9</sup>/L, lymphocyte count ≥ 0.5 × 10<sup>9</sup>/L, platelet count ≥ 100 × 10<sup>9</sup>/L, and hemoglobin ≥ 9 g/dL (may have been transfused)</li> <li>13. Adequate hepatic function defined by a total bilirubin level ≤ 1.5 × the upper limit of normal (ULN) range and AST and alanine aminotransferase (ALT) levels ≤ 2.5 × ULN for all subjects or AST and ALT levels ≤ 5 × ULN (for subjects with documented metastatic disease to the liver).</li> <li>14. Adequate renal function defined by an estimated creatinine clearance &gt; 30 mL/min according to the Cockcroft-Gault formula (or local institutional standard method)</li> <li>15. Effective contraception for both male and female subjects if the risk of conception exists (Note: The effects of the trial drug on the developing human fetus are unknown; thus, women of childbearing potential and men must agree to use effective contraception, defined as 2 barrier methods, or 1 barrier method with a spermicide, an intrauterine device, or use of oral female contraceptive. Should a woman become</li> </ol> |

|  |                                                                                                                                                                                                                                                                                                                                                                                                                                                                                                                                                                                                                                                                                                                                                                                                                                                                                                                                                                                                                                                                                                                                                                                                                                                                                                                                                                                                                                                                                                                                                                                                                                                                                                                                                                                                                                                                                                                                                                                                                                                                                                                                                                                                                                                                                                                                                                                                                                                                                                                                                                                                              |
|--|--------------------------------------------------------------------------------------------------------------------------------------------------------------------------------------------------------------------------------------------------------------------------------------------------------------------------------------------------------------------------------------------------------------------------------------------------------------------------------------------------------------------------------------------------------------------------------------------------------------------------------------------------------------------------------------------------------------------------------------------------------------------------------------------------------------------------------------------------------------------------------------------------------------------------------------------------------------------------------------------------------------------------------------------------------------------------------------------------------------------------------------------------------------------------------------------------------------------------------------------------------------------------------------------------------------------------------------------------------------------------------------------------------------------------------------------------------------------------------------------------------------------------------------------------------------------------------------------------------------------------------------------------------------------------------------------------------------------------------------------------------------------------------------------------------------------------------------------------------------------------------------------------------------------------------------------------------------------------------------------------------------------------------------------------------------------------------------------------------------------------------------------------------------------------------------------------------------------------------------------------------------------------------------------------------------------------------------------------------------------------------------------------------------------------------------------------------------------------------------------------------------------------------------------------------------------------------------------------------------|
|  | <p>pregnant or suspect she is pregnant while she or her partner is participating in this trial, the treating physician should be informed immediately.)<br/>Highly effective contraception for both male and female subjects throughout the study and for at least 30 days after last avelumab treatment administration if the risk of conception exists.</p> <p>16. No prior immunotherapy</p> <p><b>Exclusion Criteria</b></p> <p>Subjects are not eligible for this trial if they fulfill any of the following exclusion criteria:</p> <ol style="list-style-type: none"><li>1.Any contraindication to cetuximab and/or avelumab.</li><li>2.Past or current history of malignancies other than colorectal carcinoma, except for curatively treated basal and squamous cell carcinoma of the skin or in situ carcinoma of the cervix.</li><li>3.Pregnancy</li><li>4.Breastfeeding</li><li>5.Participation in a clinical study or experimental drug treatment within 30 days.</li><li>6.Subjects receiving immunosuppressive agents (such as steroids) for any reason should be tapered off these drugs before initiation of the trial treatment, with the exception of:<ul style="list-style-type: none"><li>-subjects with adrenal insufficiency, who may continue corticosteroids at physiologic replacement dose, equivalent to <math>\leq 10</math> mg prednisone daily</li><li>-intranasal, inhaled, topical steroids,</li><li>-local steroid injection (e.g., intra-articular injection)</li><li>-Systemic corticosteroids at physiologic doses <math>\leq 10</math> mg/day of prednisone or equivalent</li><li>-Steroids as premedication for hypersensitivity reactions (e.g., CT scan premedication)</li></ul></li><li>7.All subjects with brain metastases, except those meeting the following criteria:<ul style="list-style-type: none"><li>-Brain metastases have been treated locally, and</li><li>-No ongoing neurological symptoms that are related to the brain localization of the disease (sequelae that are a consequence of the treatment of the brain metastases are acceptable)</li></ul></li><li>8.Prior organ transplantation, including allogeneic stem-cell transplantation</li><li>9.Significant acute or chronic infections including, among others:<ul style="list-style-type: none"><li>-Known history of testing positive test for human immunodeficiency virus (HIV) or known acquired immunodeficiency syndrome</li><li>-Hepatitis B virus (HBV) or hepatitis C virus (HCV) infection at screening (positive HBV surface antigen or HCV RNA if anti-</li></ul></li></ol> |
|--|--------------------------------------------------------------------------------------------------------------------------------------------------------------------------------------------------------------------------------------------------------------------------------------------------------------------------------------------------------------------------------------------------------------------------------------------------------------------------------------------------------------------------------------------------------------------------------------------------------------------------------------------------------------------------------------------------------------------------------------------------------------------------------------------------------------------------------------------------------------------------------------------------------------------------------------------------------------------------------------------------------------------------------------------------------------------------------------------------------------------------------------------------------------------------------------------------------------------------------------------------------------------------------------------------------------------------------------------------------------------------------------------------------------------------------------------------------------------------------------------------------------------------------------------------------------------------------------------------------------------------------------------------------------------------------------------------------------------------------------------------------------------------------------------------------------------------------------------------------------------------------------------------------------------------------------------------------------------------------------------------------------------------------------------------------------------------------------------------------------------------------------------------------------------------------------------------------------------------------------------------------------------------------------------------------------------------------------------------------------------------------------------------------------------------------------------------------------------------------------------------------------------------------------------------------------------------------------------------------------|

## Studio CAVE (Cetuximab-AVElumab) mCRC

|  |                                                                                                                                                                                                                                                                                                                                                                                                                                                                                                                                                                                                                                                                                                                                                                                                                                                                                                                                                                                                                                                                                                                                                                                                                                                                                                                                                                                                                                                                                                                                                                                                                                                                                                                                                                                                                                                                                                                                                                                                                                                                                                                                                                                                                                                                                                                                                                                                                                                                                                                                                                                                                                                                                                                                                                                                                                                                                        |
|--|----------------------------------------------------------------------------------------------------------------------------------------------------------------------------------------------------------------------------------------------------------------------------------------------------------------------------------------------------------------------------------------------------------------------------------------------------------------------------------------------------------------------------------------------------------------------------------------------------------------------------------------------------------------------------------------------------------------------------------------------------------------------------------------------------------------------------------------------------------------------------------------------------------------------------------------------------------------------------------------------------------------------------------------------------------------------------------------------------------------------------------------------------------------------------------------------------------------------------------------------------------------------------------------------------------------------------------------------------------------------------------------------------------------------------------------------------------------------------------------------------------------------------------------------------------------------------------------------------------------------------------------------------------------------------------------------------------------------------------------------------------------------------------------------------------------------------------------------------------------------------------------------------------------------------------------------------------------------------------------------------------------------------------------------------------------------------------------------------------------------------------------------------------------------------------------------------------------------------------------------------------------------------------------------------------------------------------------------------------------------------------------------------------------------------------------------------------------------------------------------------------------------------------------------------------------------------------------------------------------------------------------------------------------------------------------------------------------------------------------------------------------------------------------------------------------------------------------------------------------------------------------|
|  | <p>HCV antibody screening test positive)</p> <p>10.Active autoimmune disease that might deteriorate when receiving an immunostimulatory agent:</p> <ul style="list-style-type: none"><li>-Subjects with diabetes type I, vitiligo, psoriasis, hypo- or hyperthyroid disease not requiring immunosuppressive treatment are eligible</li><li>-Subjects requiring hormone replacement with corticosteroids are eligible if the steroids are administered only for the purpose of hormonal replacement and at doses <math>\leq 10</math> mg or equivalent prednisone per day.</li><li>-Administration of steroids through a route known to result in a minimal systemic exposure (topical, intranasal, intro-ocular, or inhalation) are acceptable.</li><li>-Active infection requiring systemic therapy.</li></ul> <p>11.Previous or ongoing administration of systemic steroids for the management of an acute allergic phenomenon is acceptable as long as it is anticipated that the administration of steroids will be completed in 14 days, or that the daily dose after 14 days will be <math>\leq 10</math> mg per day of equivalent prednisone.</p> <p>12.Known severe hypersensitivity to investigational product or any component in its formulations, including known severe hypersensitivity reactions to monoclonal antibodies (NCI CTCAE v4.03 Grade <math>\geq 3</math>), any history of anaphylaxis, or uncontrolled asthma (that is, 3 or more feauters of partially controlled asthma).</p> <p>13.History of hypersensitivity to Polysorbate 80 that led to unacceptable toxicity requiring treatment cessation</p> <p>14. Persisting toxicity related to prior therapy of Grade <math>&gt; 1</math> NCI-CTCAE v 4.03.</p> <p>15. Known alcohol or drug abuse.</p> <p>16.Clinically significant (that is active) cardioavscular disease: cerebral vascular accident/stroke (<math>&lt;6</math> months prior to enrollment), myocardial infarction (<math>&lt;6</math> months prior to enrollment), unstable angina, comgestive heart failure (New York Heart Association Classification Class<math>\geq</math>II), or serious uncontrolled cardiac arrhythmia requiring medication</p> <p>17.Other severe acute or chronic medical conditions including immune colitis, inflammatory bowel disease, immune pneumonitis, pulmonary fibrosis or psychiatric conditions including recent (within the past year) or active suicidal ideation or behavior; or laboratory abnormalities that may increase the risk associated with study participation or study treatment administration or may interfere with the interpretation of study results and, in the judgment of the investigator, would make the patient inappropriate for entry into this study.</p> <p>18. Any psychiatric condition that would prohibit the understanding or rendering of informed consent.</p> |
|--|----------------------------------------------------------------------------------------------------------------------------------------------------------------------------------------------------------------------------------------------------------------------------------------------------------------------------------------------------------------------------------------------------------------------------------------------------------------------------------------------------------------------------------------------------------------------------------------------------------------------------------------------------------------------------------------------------------------------------------------------------------------------------------------------------------------------------------------------------------------------------------------------------------------------------------------------------------------------------------------------------------------------------------------------------------------------------------------------------------------------------------------------------------------------------------------------------------------------------------------------------------------------------------------------------------------------------------------------------------------------------------------------------------------------------------------------------------------------------------------------------------------------------------------------------------------------------------------------------------------------------------------------------------------------------------------------------------------------------------------------------------------------------------------------------------------------------------------------------------------------------------------------------------------------------------------------------------------------------------------------------------------------------------------------------------------------------------------------------------------------------------------------------------------------------------------------------------------------------------------------------------------------------------------------------------------------------------------------------------------------------------------------------------------------------------------------------------------------------------------------------------------------------------------------------------------------------------------------------------------------------------------------------------------------------------------------------------------------------------------------------------------------------------------------------------------------------------------------------------------------------------------|

**Studio CAVE (Cetuximab-AVElumab) mCRC**

|                                                                                              |                                                                                                                                                                                                                                                                                                                                                                                                                                                                                                                                                                                                                                                                                                                                                                                                                                                                                                                                                                                                                                                                                                                                                                                                                                                                                                                                                                                                                                                                                                                                                                                                                                                                                                                                                                                                                                                                                                                                                                                                                                                                                                                                                                                                                                                                                                                                         |
|----------------------------------------------------------------------------------------------|-----------------------------------------------------------------------------------------------------------------------------------------------------------------------------------------------------------------------------------------------------------------------------------------------------------------------------------------------------------------------------------------------------------------------------------------------------------------------------------------------------------------------------------------------------------------------------------------------------------------------------------------------------------------------------------------------------------------------------------------------------------------------------------------------------------------------------------------------------------------------------------------------------------------------------------------------------------------------------------------------------------------------------------------------------------------------------------------------------------------------------------------------------------------------------------------------------------------------------------------------------------------------------------------------------------------------------------------------------------------------------------------------------------------------------------------------------------------------------------------------------------------------------------------------------------------------------------------------------------------------------------------------------------------------------------------------------------------------------------------------------------------------------------------------------------------------------------------------------------------------------------------------------------------------------------------------------------------------------------------------------------------------------------------------------------------------------------------------------------------------------------------------------------------------------------------------------------------------------------------------------------------------------------------------------------------------------------------|
|                                                                                              | <p>19. Vaccination within 4 weeks of the first dose of avelumab and cetuximab and while on treatment is prohibited except for administration of inactivated vaccine (i.e. inactivated influenza vaccine)</p> <p>20. Legal incapacity or limited legal capacity.</p>                                                                                                                                                                                                                                                                                                                                                                                                                                                                                                                                                                                                                                                                                                                                                                                                                                                                                                                                                                                                                                                                                                                                                                                                                                                                                                                                                                                                                                                                                                                                                                                                                                                                                                                                                                                                                                                                                                                                                                                                                                                                     |
| <p><b>Investigational Medicinal Product: dose/mode of administration/dosing schedule</b></p> | <p>Avelumab will be administered as a 1-hour IV infusion at 10 mg/kg once every 2-week treatment cycle.</p> <p>Cetuximab will be administered at 1<sup>st</sup> dose at 400 mg/m<sup>2</sup> by i.v. infusion over 120 minutes, after avelumab infusion.</p> <p>The 2<sup>nd</sup> dose and subsequent doses will be performed at 250 mg/m<sup>2</sup> by i.v. infusion over 60 minutes, every week and after avelumab infusion every two weeks.</p> <p>NB: Dilution is not required, but is possible in NaCl 0.9% only, via infusion pump or gravity drip.</p> <p><u>Special Precautions for Administration:</u></p> <ul style="list-style-type: none"> <li>• Premedication: In order to mitigate infusion related reactions, a premedication with an antihistamine and with paracetamol (acetaminophen) 30 to 60 minutes prior to the infusions of avelumab and cetuximab is mandatory (for example, 25 50 mg diphenhydramine and 500 650 mg paracetamol IV or oral). This may be modified based on local treatment standards and guidelines, as appropriate.</li> <li>• Setting: Avelumab and cetuximab should be administered in a setting that allows for immediate access to an intensive care unit or equivalent environment and administration of therapy for anaphylaxis, such as the ability to implement immediate resuscitation measures. Steroids (dexamethasone 10 mg), epinephrine (1:1,000 dilution), allergy medications (IV antihistamines), bronchodilators, or equivalents, and oxygen should be available for immediate access and must be in place for use in the treatment of potential infusion-related reactions.</li> <li>• Observation period: Following avelumab infusions, patients must be observed for 30 minutes post infusion for potential infusion related reactions.</li> </ul> <p>The dose of avelumab and cetuximab will be calculated based on the weight and body surface, respectively, of the subject determined on the day prior to or the day of each drug administration.</p> <p>Infusion of avelumab will be stopped in case of Grade <math>\geq</math> 2 infusion-related, allergic, or hypersensitivity reactions (according to NCI-CTCAE v 4.03).</p> <p>If the subject experiences an infusion-related reaction of Grade 2, the infusion rate of the subsequent administration of</p> |

## Studio CAVE (Cetuximab-AVElumab) mCRC

|                                               |                                                                                                                                                                                                                                                                                                                                                                                                                                                                                                                                                                                                                                                                                                                                                                                                                                                                                                                                                                                                                                                                                                                                                                                                                                                                                                                                                                                                                                                                                                                                                      |
|-----------------------------------------------|------------------------------------------------------------------------------------------------------------------------------------------------------------------------------------------------------------------------------------------------------------------------------------------------------------------------------------------------------------------------------------------------------------------------------------------------------------------------------------------------------------------------------------------------------------------------------------------------------------------------------------------------------------------------------------------------------------------------------------------------------------------------------------------------------------------------------------------------------------------------------------------------------------------------------------------------------------------------------------------------------------------------------------------------------------------------------------------------------------------------------------------------------------------------------------------------------------------------------------------------------------------------------------------------------------------------------------------------------------------------------------------------------------------------------------------------------------------------------------------------------------------------------------------------------|
|                                               | <p>avelumab or cetuximab will be reduced by 50%. If a subject experiences a Grade 3 or 4 infusion-related reaction at any time, the subject must discontinue avelumab or cetuximab.</p> <p>If the subject has a second infusion-related reaction Grade <math>\geq 2</math> on the slower infusion rate, the infusion should be stopped and the subject should be removed from treatment.</p>                                                                                                                                                                                                                                                                                                                                                                                                                                                                                                                                                                                                                                                                                                                                                                                                                                                                                                                                                                                                                                                                                                                                                         |
| <b>Planned treatment duration per subject</b> | <p>Subjects will receive trial treatment until progressive disease (PD) per RECIST 1.1, significant clinical deterioration (clinical progression), unacceptable toxicity, withdrawal of consent, or if any criterion for withdrawal from the trial or trial treatment is fulfilled. Treatment may continue past the initial determination of disease progression per RECIST 1.1 if the subject's ECOG PS has remained stable, and if in the opinion of the Investigator, the subject will benefit from continued treatment and if other criteria are fulfilled as outlined in the protocol, that is, no new symptoms or worsening of existing symptoms and no decrease in performance score.</p> <p>Subjects receiving avelumab plus cetuximab who have experienced a CR should be treated for a maximum of 24 months after confirmation, at the discretion of the Investigator. If the Investigator believes that a subject may benefit from treatment beyond 24 months, it may be permissible after discussion with the Sponsor. In case a subject with a confirmed CR relapses after stopping treatment, but prior to the end of the trial, 1 re-initiation of treatment is allowed at the discretion of the Investigator and agreement of the Medical Monitor. In order to be eligible for re-treatment, the subject must not have experienced any toxicity that led to treatment discontinuation of the initial therapy. Subjects who re-initiate treatment will stay on trial and will be treated and monitored according to the protocol.</p> |
| <b>Primary endpoint</b>                       | The primary endpoint for the trial is OS time, defined as the interval from enrollment to death for every cause.                                                                                                                                                                                                                                                                                                                                                                                                                                                                                                                                                                                                                                                                                                                                                                                                                                                                                                                                                                                                                                                                                                                                                                                                                                                                                                                                                                                                                                     |
| <b>Secondary/exploratory endpoints</b>        | <p>Secondary endpoints will be:</p> <ul style="list-style-type: none"> <li>• The overall response rate (ORR) according to RECIST 1.1</li> <li>• Progression free survival (PFS) according to RECIST 1.1</li> <li>• The safety profile of the trial drugs as measured by the incidence of AEs, SAEs, clinical laboratory assessments, vital signs, physical examination, ECG parameters, and ECOG PS.</li> </ul>                                                                                                                                                                                                                                                                                                                                                                                                                                                                                                                                                                                                                                                                                                                                                                                                                                                                                                                                                                                                                                                                                                                                      |
| <b>Exploratory endpoints</b>                  | <p>Exploratory endpoints are</p> <ul style="list-style-type: none"> <li>• Duration of response of cetuximab plus avelumab according to RECIST 1.1</li> <li>• Quantification PD-L1 expression levels in tumor cells</li> </ul>                                                                                                                                                                                                                                                                                                                                                                                                                                                                                                                                                                                                                                                                                                                                                                                                                                                                                                                                                                                                                                                                                                                                                                                                                                                                                                                        |



**Studio CAVE (Cetuximab-AVElumab) mCRC**

|                                                                      |                                                                                                                                                                                                                                                                                                                                                                                                                                                                                                                                                                                                                                                                                                                                                                                                                                                                                                   |
|----------------------------------------------------------------------|---------------------------------------------------------------------------------------------------------------------------------------------------------------------------------------------------------------------------------------------------------------------------------------------------------------------------------------------------------------------------------------------------------------------------------------------------------------------------------------------------------------------------------------------------------------------------------------------------------------------------------------------------------------------------------------------------------------------------------------------------------------------------------------------------------------------------------------------------------------------------------------------------|
|                                                                      | <p>and cells of the tumor microenvironment at baseline with their relation to selected clinical response parameters</p> <ul style="list-style-type: none"> <li>• EGFR expression levels in tumor cells as candidate predictive biomarker with their relation to selected clinical response parameters</li> <li>• Molecular, cellular, and soluble markers in peripheral blood and/or tumor tissue that may be relevant to the mechanism of action of, or response/resistance to avelumab and cetuximab</li> </ul>                                                                                                                                                                                                                                                                                                                                                                                 |
| <p><b>Statistical methods (includes sample size calculation)</b></p> | <p>To determine the potential efficacy on OS of the combination of avelumab and cetuximab we have considered the median OS that is obtained in third line in mCRC patients treated with standard third line therapy (CORRECT, RE COURSE). The current study aims to demonstrate a median OS of 11.0months (alternative hypothesis) by experimental combination for comparison with historical median OS 8.0(null hypothesis) with standard third line treatment, which correspond to an improvement of OS at 6 months from 35% to 46%. It was estimated that we would need to enroll 66 patients to achieve with a 1-sided 5% level test in this single stage, single arm trial. The accrual period will be of 18 months and the total duration of the stud will be of 36 months. Considering a potential drop-out of approximately 15% of patients a total of 75 patients will be recruited.</p> |

140  
 141  
 142  
 143  
 144  
 145  
 146  
 147  
 148  
  
 149  
  
 150  
  
 151  
  
 152  
  
 153  
  
 154

**2. Sponsor, Investigators, and Trial Administrative Structure**

## Studio CAVE (Cetuximab-AVElumab) mCRC

155 The Sponsor of this clinical trial with avelumab and cetuximab is the Dipartimento di internistica  
156 clinica e sperimentale "Flaviano Magrassi" Università degli studi della Campania "Luigi Vanvitelli"

157

### 158 2.1 Investigational Sites

159 The trial will be conducted in Italy in 9 Centers.

## 160 3. Background Information

### 161 3.1 Metastatic colorectal cancer

162 Colorectal cancer (CRC) is considered the third most commonly diagnosed cancer in males and the  
163 second in females worldwide, with an estimated 1.4 million new cases in 2012. In the same year,  
164 CRC was responsible for 693900 deaths, making it the fourth leading cause of cancer-related death  
165 in men and the third in women(1). Although the advances in screening and medical treatments  
166 have led a trend in reduction of both incidence and mortality, almost 20% of patients present  
167 metastases at the time of diagnosis, and approximately 35% of patients will subsequently develop  
168 a metastatic disease(2). The prognosis of patients with metastatic colorectal cancer (mCRC) has  
169 improved over the last 20 years, thanks to the introduction of active chemotherapy drugs and  
170 target therapies, such as fluropyrimidines, oxaliplatin, irinotecan, TAS-102, and of targeted drugs,  
171 such as bevacizumab, cetuximab, panitumumab, aflibercept, ramucirumab and regorafenib that  
172 led to an increase in median overall survival (OS) from 6 mo, with the only best supportive care  
173 (BSC), to approximately 30 mo(3,4).

174 The Epidermal Growth Factor Receptor (EGFR) targeted therapy with the monoclonal antibodies  
175 cetuximab or panitumumab represents a major step forward in the treatment of RAS wild type  
176 (WT) metastatic colorectal cancer (mCRC), given the relevant efficacy in terms of progression-free  
177 survival (PFS), overall survival (OS), response rate (RR), as well as quality of life (QoL), observed in  
178 several phase III clinical trials among different lines of treatment. However, the clinical benefit  
179 observed with these agents is limited to only a subset of patients and responses are often  
180 transient due to the development of various mechanisms of resistance. Several studies have  
181 provided new insights into molecular basis of EGFR inhibitors resistance and have identified  
182 mutations in KRAS, NRAS, BRAF and EGFR extracellular domain (ECD) as well as the amplification  
183 of ERBB2 and MET, as biomarkers of both primary and/or acquired resistance to these drugs.  
184 Unraveling the biology underlying the complex mechanisms of resistance have been useful for  
185 developing rational combination therapies in order to revert or overcome resistance. Rechallenge  
186 with an alternative anti-EGFR monoclonal antibody (MoAb) after failure with an agent of the same  
187 family has been proposed as strategy to overcome drug resistance. However, panitumumab, as  
188 single agent, has demonstrated to provide minimal benefit in patients with KRAS WT mCRC who  
189 have experienced progression to cetuximab as prior therapy (5,6). The hypotheses that  
190 pre-existing sensitive subclones may emerge after treatment breaks with anti-EGFR moAb has led  
191 the design of several clinical trials prospectively evaluating the rechallenge with anti-EGFR moAbs  
192 in the third-line setting after a response to a first-line therapy with anti-EGFR drugs (7). The  
193 immune system has a crucial role in modulating response to monoclonal antibody therapy in  
194 cancer, with novel agents inducing potent cytotoxicity and combinations with immune checkpoint  
195 inhibitors worth exploring in the anti-EGFR resistance setting. Avelumab is a fully human anti-PD-  
196 L1 IgG1 monoclonal antibody. By inhibiting PD-L1 interactions, avelumab is thought to enable the  
197 activation of T-cells and the adaptive immune system. By retaining a native Fc-region, avelumab is  
198 thought to potentially engage the innate immune system and induce antibody-dependent cell-

## Studio CAVE (Cetuximab-AVElumab) mCRC

199 mediated cytotoxicity (ADCC) (8). In preclinical model, Cetuximab stimulates tumor antigen  
200 presentation through the formation of immune complexes, which enhances the induction of tumor  
201 specific T cells. In an *in vitro* study using colon cancer cell lines, cetuximab promoted dendritic cell  
202 (DC) opsonization of tumor cells, and associated DC maturation with increased expression of MHC  
203 class II molecules, CD40, CD80 and CD 86. DCs incubated with tumor cells and cetuximab more  
204 effectively primed tumor-specific T cells than DCs that were incubated with tumor cells alone(9).  
205 Additionally, cetuximab facilitates NK cell-mediated antibody-dependent cellular cytotoxicity  
206 (ADCC) and complement-dependent cytotoxicity(CDC), which may further enhance tumor cell killing  
207 (10, 11).Cetuximab in combination with avelumab could be a valid therapeutic option for  
208 mCRCRAS WT patients that achieved a major response in the first line of therapy to panitumumab  
209 or cetuximab as third line rechallenge treatment.

210

### 211 3.2Avelumab

212 The Investigational Medicinal Product (IMP) for the present trial is avelumab (\*avelumab is the  
213 proposed International Nonproprietary Name for the anti-PD-L1 monoclonal antibody  
214 MSB0010718C), a fully human monoclonal antibody of the immunoglobulin (Ig) G1 isotype. This  
215 anti-PD-L1 therapeutic antibody concept is being developed in oncological settings by Merck  
216 KGaA, Darmstadt, Germany, and by its subsidiary, EMD Serono R&D, Billerica, MA, USA.

217 Avelumab selectively binds to PD-L1 and competitively blocks its interaction with PD-1. Compared  
218 with anti-PD-1 antibodies that target T-cells, avelumab targets tumor cells, and therefore is  
219 expected to have fewer side effects, including a lower risk of autoimmune-related safety issues, as  
220 blockade of PD-L1 leaves the PD-L2 – PD-1 pathway intact to promote peripheral self-tolerance  
221 (22). For complete details of the *in vitro* and nonclinical studies, please refer to the Investigator's  
222 Brochure.Avelumab is currently in clinical development with 2 ongoing Phase I studies in subjects  
223 with solid tumors and a Phase II trial in subjects with Merkel cell carcinoma:

- 224 - Trial EMR100070-001 is “a Phase I, open-label, multiple-ascending dose trial to investigate  
225 the safety, tolerability, pharmacokinetics, biological, and clinical activity of avelumab in  
226 subjects with metastatic or locally advanced solid tumors.” The most frequently reported  
227 treatment-related emergent adverse events (TEAEs) observed in subjects during the dose-  
228 expansion portion of the trial are presented in Table 1.

229 **Table 1. Most Frequently Reported Treatment-related TEAEs During Dose Expansion**

230

| Treatment-emergent Adverse Events Grade ≤2 a Preferred Term (MedDRA) | Subjects (Safety Population, N = 480) N (%) | Treatment-emergent Adverse Events Grade ≥3 a Preferred Term (MedDRA) | Subjects (Safety Population, N = 480) N (%) |
|----------------------------------------------------------------------|---------------------------------------------|----------------------------------------------------------------------|---------------------------------------------|
| Fatigue                                                              | 97 (20.2%)                                  | Fatigue                                                              | 5 (1.0%)                                    |
| Nausea                                                               | 62 (12.9%)                                  | Anemia                                                               | 5 (1.0%)                                    |
| Infusion-related reaction                                            | 47 (9.8%)                                   | Infusion-related reaction                                            | 4 (0.8%)                                    |
| Chills                                                               | 33 (6.9%)                                   | Lipase increase                                                      | 4 (0.8%)                                    |
| Diarrhea                                                             | 33 (6.9%)                                   | GGT increase                                                         | 4 (0.8%)                                    |
| Decreased appetite                                                   | 30 (6.3%)                                   |                                                                      |                                             |
| Pyrexia                                                              | 27(5.6%)                                    |                                                                      |                                             |
| Influenza like illness                                               | 25 (5.2%)                                   |                                                                      |                                             |
| Arthralgia                                                           | 24 (5.0%)                                   |                                                                      |                                             |

## Studio CAVE (Cetuximab-AVElumab) mCRC

231 *MedDRA = Medical Dictionary for Regulatory Activities. a Only treatment-emergent adverse events started during the*  
232 *on-treatment period are summarized.*

233

### 234 Serious Adverse Events

235 Overall, 176 of the 480 subjects (36.7%) treated during the dose expansion had serious TEAEs. Of  
236 these, 22 (4.6%) subjects reported dyspnea, which was the most frequent serious TEAE in this  
237 group, followed by 19 subjects (4.0%) reporting disease progression, 12 subjects (2.5%) reporting  
238 pleural effusion, 11 subjects (2.3%) reporting pneumonia, and 7 subjects (1.5%) reporting anemia.  
239 All other serious TEAEs were each reported in less than 1.5% of subjects. Of the serious TEAEs  
240 considered treatment-related by the Investigator (31 subjects; 6.5%), the following were reported  
241 for 2 or more subjects: infusion-related reaction (4 subjects, 0.8%), pneumonitis (3 subjects,  
242 0.6%), and disease progression, dyspnea, and hypercalcemia (each in 2 subjects, 0.4%).

243

244

### 245 Deaths and withdrew from trial

246 In total, 134 subjects (27.9%) treated during the dose expansion died up to the cut-off date. Of  
247 these, the majority of deaths (101 deaths; 21.0%) were due to disease progression. A further  
248 8 deaths (1.7%) were due to TEAEs unrelated to trial treatment, 4 deaths (0.8%) were due to TEAEs  
249 related to trial treatment, and the reason for 8 deaths (1.7%) was labeled as other.

250

251 The reason for 13 deaths (2.7%) was unknown at the time of the data cut-off. Of the 134 subjects  
252 who died, 53 subjects (11.0%) died within 30 days of the last administration of trial treatment.  
253 Among these deaths, 39 (8.1%) were due to disease progression, 7 (1.5%) were due to TEAEs  
254 unrelated to trial treatment, 4 (0.8%) were due to TEAEs related to trial treatment, and 3 (0.6%)  
255 were due to other reasons. No death of unknown reason was reported in the 30-day period. A  
256 total of 80 subjects (16.7%) treated during the dose expansion withdrew permanently from trial  
257 treatment due to one or more TEAE. In 25 (6.6%) of these subjects, the TEAEs leading to treatment  
258 discontinuation were considered related to trial treatment by the Investigator. These TEAEs were  
259 infusion-related reaction (6 withdrawals; 1.6%), GGT increased (3 withdrawals, 0.8%), dyspnea (3  
260 withdrawals; 0.8%), and radiation pneumonitis, aspartate aminotransferase (AST) increased,  
261 hepatocellular injury, blood creatine phosphokinase increased, blood pressure increased,  
262 pneumonitis, anaphylactic reaction, food allergy, adrenal insufficiency, anemia, hypercalcemia,  
263 hyperglycemia, arthralgia, arthritis, myositis, pain, abdominal pain lower, chest discomfort,  
264 cramps and ache on back and all over body (not yet coded), encephalopathy, syncope, and  
265 flushing (1 withdrawal each; 0.3%). Most of the events of infusion-related reaction and  
266 anaphylactic reaction that led to permanent discontinuation of trial treatment (as described  
267 above) occurred before implementation of mandatory premedication on 28 January 2014.

### 268 Immunorelated (Ir) Adverse Events

269 A cumulative review revealed 56 cases of potential immune-related AEs of out of 480 subjects  
270 (11.7%) treated in the dose expansion part of trial EMR 100070-001 and 4 cases out of 50 subjects  
271 (8.0%) treated in the dose escalation part of trial EMR 100070-001.

272 Of 69 potential irAEs reported, 13 were SAEs (18.8%) and 56 were non-serious AEs (81.1%). In the  
273 majority of the cases, there was a plausible temporal association between the event onset and the  
274 drug administration. Of these 69 events, 46 events (66.7%) were assessed as treatment-related by  
275 the Investigator and 23 events (33.3%) were assessed as not treatment-related by the  
276 Investigator. Twenty-six events were assessed as Grade 1, 29 events as Grade 2, 11 events as

## Studio CAVE (Cetuximab-AVElumab) mCRC

277 Grade 3, 2 events as Grade 4, and 1 event (pneumonitis) as Grade 5 (Please note: two more events  
278 of autoimmune hepatitis had a fatal outcome; however, they were assessed as Grade 3 with a  
279 consequent fatal liver failure). Based on the irAE cases that have been observed, all trial  
280 Investigators have been trained to be made aware of the frequency and severity of the observed  
281 events and to proactively administer steroid treatment for any suspicion of irAEs. Of note, irAEs  
282 are considered as an identified risk by the Sponsor.

283 Two suspected unexpected serious adverse reactions (SUSARs; anaphylactic reaction and infusion-  
284 related reaction) involving 2 subjects were reported in December 2013 and triggered a cumulative  
285 review of serious and non-serious cases of infusion-related reactions / hypersensitivity across the  
286 avelumab program. Following evaluation of safety signals, infusion-related reactions /  
287 hypersensitivity have been classified as a newly identified risk (previously classified as a potential  
288 risk) and a mandatory premedication regimen of a histamine H1 receptor (H1) blockers plus  
289 acetaminophen was implemented for all trial subjects as of 28 January 2014.

290 As of 05 November 2014, 49 (10.2%) of the 480 subjects in the expansion cohorts experienced at  
291 least 1 episode of an infusion-related reaction when receiving avelumab monotherapy. Most of  
292 the events were Grade 1 (8 subjects, 1.7%) or Grade 2 (36 subjects, 7.5%) in intensity, and Grade 3  
293 (3 subjects, 0.6%) or Grade 4 events (2 subjects, 0.4%) were less frequent. No Grade 5 events were  
294 reported. Most of the infusion-related reaction events had an onset after the first (30 subjects,  
295 6.3%) or second (16 subjects, 3.3%) avelumab infusion. In 8 subjects (1.7%), avelumab treatment  
296 was discontinued because of infusion-related reaction events. In addition, 1 subject (2.0%) in the  
297 dose escalation cohort reported an infusion-related reaction event (Grade 2). In addition to the  
298 aforementioned 49 subjects, 1 case of Grade 4 cardiac arrest occurred 1.5 hours after the third  
299 infusion of avelumab (10 mg/kg). The subject died due to an anoxic brain injury 7 days later; no  
300 autopsy was performed. Starting from 29 January 2014, the Sponsor has implemented a  
301 mandatory premedication with H1 blockers plus acetaminophen for all subjects who are to receive  
302 avelumab. This premedication procedure was applied to 28 and 440 subjects in the dose  
303 escalation and the pooled treatment expansion cohort, respectively. Under this premedication  
304 procedure, 33 of 440 subjects (7.5%) in the expansion cohort experienced infusion-related  
305 reaction events, with 6 subjects (1.4%) having Grade 1, 26 subjects (5.9%) having Grade 2, and 1  
306 subject (0.2%) having Grade 3 events. No infusion-related reaction events were reported in the 28  
307 subjects in the dose escalation cohort. Guidelines for the management of infusion-related  
308 reactions and severe hypersensitivity reaction according to the National Cancer Institute (NCI) are  
309 found in Section 5.4. A complete guideline for the emergency treatment of anaphylactic reactions  
310 according to the Working Group of the Resuscitation Council (United Kingdom) can be found at  
311 <https://www.resus.org.uk/pages/reaction.pdf>.

312 Further information about the events described below is available in the current version of the  
313 Investigator's Brochure.

- 314 - Trial EMR100070-002 is "a Phase I trial to investigate the tolerability, safety,  
315 pharmacokinetics, biological, and clinical activity of avelumab in Japanese subjects with  
316 metastatic or locally advanced solid tumors, with expansion part in Asian subjects with  
317 gastric cancer."  
318
- 319 - Trial EMR100070-003 is "a Phase II, open-label, multicenter trial to investigate the clinical  
320 activity and safety of avelumab in subjects with Merkel cell carcinoma."

321

322 **3.3 Cetuximab**

323 Cetuximab (ERBITUX®) has been approved and is available in the United States, European Union,  
 324 Switzerland and over fifty countries worldwide. Cetuximab is a targeted therapeutic agent, a  
 325 chimeric IgG1 monoclonal antibody that specifically binds to the EGFR with high affinity, internalising  
 326 the receptor and preventing the ligands EGF and TGF- $\alpha$  from interacting with the receptors and thus  
 327 effectively blocking ligand-induced EGFR phosphorylation (22). In addition, cetuximab has been  
 328 found to potentiate the effects of chemotherapy and radiotherapy in experimental systems (23,  
 329 24). The dose of cetuximab (initial dose 400 mg/m<sup>2</sup> and subsequent weekly doses of 250 mg/m<sup>2</sup>) has  
 330 been found to be generally safe and effective in several studies in major tumor types expressing the  
 331 EGFR. These included colorectal cancer, squamous cell carcinoma of the head and neck and non-  
 332 small cell lung cancer, with cetuximab given either in combination with chemotherapy and/or  
 333 radiotherapy or as monotherapy. The main side effects of cetuximab monotherapy are  
 334 hypersensitivity and acne-like skin reactions.

335

336 **3.4 Epidermal growth factor receptor**

337 The EGFR is a transmembrane glycoprotein, which is commonly expressed, in many normal human  
 338 tissues and solid human tumors (Table 2). It was one of several growth factors and their receptors,  
 339 which were found to be encoded by proto-oncogenes. It is a member of the tyrosine kinase family of  
 340 growth factor receptors, and is over-expressed in many human tumor types. The EGFR, when  
 341 situated in the transmembrane position, has an extracellular domain, which provides a ligand-  
 342 binding site for epidermal growth factor (EGF) and transforming growth factor alpha (TGF $\alpha$ ). The  
 343 intracellular domain of EGFR is activated upon ligand binding, which triggers the EGF-mediated  
 344 tyrosine kinase signal transduction pathway and cascades many cellular operations concerning cell  
 345 growth and division (25).

346 Analyses performed in vitro, using cell lines with a high degree of EGFR expression have shown a  
 347 proliferation of cells in culture, probably due to activation via an autocrine pathway. In contrast,  
 348 EGFR antagonists, which block the ligand-binding site, have been developed in order to inhibit  
 349 proliferation of EGFR-expressing cells (26-28).

350

351

352 **Table 2. Prevalence of EGFR expression in common tumour types**

353

| Tumour Type                   | EGFR Expression |
|-------------------------------|-----------------|
| Head and Neck                 | 90 - 100%       |
| Colon                         | 75 – 89%        |
| Prostate                      | Up to 100%      |
| Pancreatic                    | Up to 95%       |
| Breast                        | Up to 91%       |
| Renal                         | Up to 90%       |
| Cervix                        | Up to 82%       |
| Non-Small Cell Lung Carcinoma | Up to 80%       |
| Ovarian                       | Up to 77%       |
| Bladder                       | Up to 72%       |
| Primary Glioblastoma          | Up to 63%       |

354

355

356

357 **3.5 Cetuximab general safety information**  
358

359 Adverse event data are available for 3339 patients treated with cetuximab alone or in combination  
360 with chemotherapy and/or radiation therapy from investigational trials across all indications  
361 conducted by ImClone, BMS, Merck KGaA, Investigator sponsored Trials (IST), Cooperative Groups  
362 and the National Cancer Institute (NCI). As most of the trials were conducted under different  
363 settings and in combination with various cytostatic therapies, adverse reaction rates cannot be  
364 validly pooled and quoted as mean rates. Nevertheless, they constitute a basis for identifying  
365 approximate adverse event rates associated with the administration of Cetuximab.

366 Skin reactions may develop in more than 80% of patients and mainly present as acne-like rash  
367 and/or, less frequently, as pruritus, dry skin, desquamation, hypertrichosis, or nail disorders (e.g.  
368 paronychia). The majority of skin reactions develop within the first three weeks of therapy. They  
369 generally resolve, without sequelae, over time following cessation of treatment if the recommended  
370 adjustments in dose regimen are followed (29). Approximately 15% of the skin reactions are severe,  
371 including single cases of skin necrosis. In the event of Grade 3 or 4 skin reactions the patients should  
372 be referred for dermatological advice.

373 The incidence of radiation dermatitis of any grade was comparable between the treatment groups in  
374 a phase 3 SCCHN trial in patients receiving either cetuximab in combination with RT (86%) or RT  
375 alone (90%) (30)

376  
377 Other side effects observed in patients receiving cetuximab monotherapy include asthenia,  
378 dyspnoea, mucositis, nausea, pain, fever and headache.

379 Mild or moderate infusion-related reactions may occur ( $\geq 1/10$ ) comprising symptoms such as fever,  
380 chills, nausea, vomiting, headache, dizziness, or dyspnoea that occur in a close temporal relationship  
381 mainly to the first cetuximab infusion (29). They can be managed by slowing the infusion rate of  
382 cetuximab and by the continued use of pre- medications for subsequent doses in addition to the  
383 mandatory use for the first infusion.

384  
385 Severe infusion-related reactions may occur ( $\geq 1/100, < 1/10$ ), in rare cases with fatal outcome. They  
386 usually develop during or within 1 hour of the initial cetuximab infusion and may include symptoms  
387 such as rapid onset of airway obstruction (bronchospasm, stridor, hoarseness, difficulty in speaking),  
388 urticaria, hypotension, or loss of consciousness; in rare cases, angina pectoris, myocardial infarction  
389 or cardiac arrest have been observed. Severe infusion reactions (grade 3 or 4) require immediate  
390 interruption of the cetuximab infusion and permanent discontinuation from further treatment (29).

391 A large multinational study of cetuximab plus irinotecan in irinotecan-resistant metastatic colorectal  
392 cancer (MABEL) investigated, in a post-hoc analysis, whether the type of prophylactic pre-  
393 medication had an impact on the incidence of infusion-related reactions including  
394 allergic/hypersensitivity reactions. The incidence of infusion-related reactions was lower in patients  
395 who received anti-histamines and corticosteroids as prophylactic medication (9.6%, n=700)  
396 compared to patients who received anti-histamines but not corticosteroids (25.6%, n=422). A similar  
397 trend was seen in the analysis of the grade 3/4 infusion-related reactions (1% vs. 4.7%). These data  
398 suggest that the addition of corticosteroids to antihistamines as prophylactic pre-medication seems  
399 to reduce the incidence of infusion-related reactions such as allergic/-hypersensitivity reactions (31).

400  
401 Progressively decreasing serum magnesium levels have been observed leading to severe  
402 hypomagnesaemia in some patients. Hypomagnesaemia is reversible following discontinuation of  
403 cetuximab. Depending on severity, other electrolyte disturbances, mainly hypocalcaemia or  
404 hypokalaemia, have also been observed. Determination of serum electrolyte levels is recommended

## Studio CAVE (Cetuximab-AVElumab) mCRC

405 prior to and periodically during cetuximab treatment. Electrolyte repletion is recommended, as  
406 appropriate (29).

407  
408

### 409 **4. Trial Objectives**

#### 410 **4.1 Primary**

411 The primary objective of the study is to evaluate the efficacy (OS) of avelumab and cetuximab  
412 combined in pre-treated RAS wild type metastatic colorectal cancer patients

413

#### 414 **4.2 Secondary objectives**

415 Secondary objectives are as follows:

416

- 417 • To demonstrate superiority with regard to the objective response rate (ORR) of avelumab  
418 and cetuximab combined in pre-treated RAS wild type metastatic colorectal cancer  
419 patients.
- 420 • To demonstrate superiority with regard to progression free survival (PFS) of avelumab and  
421 cetuximab combined in pre-treated RAS wild type metastatic colorectal cancer patients.
- 422 • To determine the safety and tolerability of avelumab and cetuximab combined in pre-  
423 treated RAS wild type metastatic colorectal cancer patients

424

425

#### 426 **4.3 Exploratory objectives**

427

428 Exploratory objectives are as follows:

429

- 430 • To determine duration of response of cetuximab plus avelumab
- 431 • To evaluate PD-L1 expression levels in tumor cells and cells of the tumor  
432 microenvironment (for example, infiltrating lymphocytes) as candidate predictive  
433 biomarker with their relation to selected clinical response parameters
- 434 • To characterize the immunogenicity of cetuximab plus avelumab
- 435 • To evaluate EGFR expression levels in tumor cells as candidate predictive biomarker with  
436 their relation to selected clinical response parameters
- 437 • To explore molecular, cellular, and soluble markers in peripheral blood and/or tumor tissue  
438 that may be relevant to the mechanism of action of, or response/resistance to avelumab  
439 and cetuximab

439

#### 440 **4.4 Exploratory endpoints**

441

442 Exploratory endpoints are

443

- 444 • Duration of response of cetuximab plus avelumab according to RECIST 1.1
- 445 • Quantification of PD-L1 expression levels in tumor cells and cells of the tumor  
446 microenvironment at baseline with their relation to selected clinical response parameters
- 447 • EGFR expression levels in tumor cells as candidate predictive biomarker with their relation  
447 to selected clinical response parameters



## Studio CAVE (Cetuximab-AVElumab) mCRC

- 448       • Molecular, cellular, and soluble markers in peripheral blood and/or tumor tissue that may  
449       be relevant to the mechanism of action of, or response/resistance to avelumab and  
450       cetuximab

451 The exploratory endpoint analyses will be performed on the ITT analysis set.

452 Duration of response will be analyzed descriptively by treatment arm. The Kaplan-Meier estimate  
453 of median time along with its 95% CI, as well as estimates of the survival function at 3, 6, and 12  
454 months will be calculated for duration of response.

455

### 456       **5. Investigational Plan**

457

#### 458       **5.1 Overall Trial Design and Plan**

459

460 This is a non-profit phase II, open-label, single-arm study of cetuximab plus avelumab in patients  
461 with RAS WT mCRC treated in first line with chemotherapy in combination with an anti-EGFR drug  
462 that have had a clinical benefit (complete or partial response) from treatment.

463

464 Approximately 75 subjects are planned to be enrolled in the Phase II to receive avelumab at a dose  
465 of 10 mg/kg once every 2 weeks plus cetuximab at a starting dose of 400 mg/m<sup>2</sup> by i.v. infusion  
466 over 120 minutes at first dose and at the dose of 250 mg/m<sup>2</sup> by i.v. infusion over 60 minutes for  
467 subsequent infusions every week.

468

469 At the screening, when available, tumor tissue will be collected in order to analyze the PD-L1 and  
470 EGFR expression by IHC (Appendix I, table 8)

471 During the Screening, and at progression the following collections will be performed:

- 472       • Blood and plasma samples will be collected from all subjects prior to infusion on Day 1  
473       (Week 1; Baseline samples for soluble factors may also be collected at Screening, instead of  
474       on Day 1 prior to dosing) and at progression (Appendix I, table 8).

475

476

477 Subjects will return to the clinic at regular intervals for assessments. Tumor measurements by  
478 computed tomography (CT) scan or magnetic resonance imaging (MRI) will be performed every 8  
479 weeks to determine response to treatment. Response will be evaluated using the RECIST 1.1.

480

481 Treatment will continue until

- 482       - disease progression  
483       - significant clinical deterioration  
484       - unacceptable toxicity, or  
485       - any criterion for withdrawal from the trial or trial drug is fulfilled (see Section 5.6).

486

487 Treatment may continue past the initial determination of disease progression according to RECIST  
488 1.1 if the subject's performance status has remained stable, and if in the opinion of the  
489 Investigator, the subject will benefit from continued treatment and if other criteria are fulfilled as  
490 outlined in the protocol, that is, no new symptoms or worsening of existing symptoms and no  
491 decrease in performance score.

492

## Studio CAVE (Cetuximab-AVElumab) mCRC

493 Subjects who have experienced a complete response (CR) should be treated for a maximum of 24  
494 months after confirmation, at the discretion of the Investigator. If the Investigator believes that a  
495 subject may benefit from treatment beyond 24 months, it may be permissible. In case a subject  
496 with a confirmed CR relapses after stopping treatment, but prior to the end of the trial, 1 re-  
497 initiation of treatment is allowed at the discretion of the Investigator. In order to be eligible for re-  
498 treatment, the subject must not have experienced any toxicity that led to treatment  
499 discontinuation of the initial avelumab plus cetuximab therapy. Subjects who re-initiate treatment  
500 will stay on trial and will be treated and monitored according to the protocol and the “until  
501 progression” schedule in the Schedule of Assessments (see Appendix I).

502

503 Subjects will attend clinic visits at regular intervals to receive trial treatment and for efficacy and  
504 safety assessments (see Section 7.2).

505

506

### 507 **5.2 Trial Endpoints**

508

#### 509 **5.2.1 Primary Endpoints**

510 The primary endpoint for the trial is OS time, defined as the interval from enrollment to death for  
511 every cause.

512

#### 513 **5.2.2 Secondary Endpoints and Exploratory Endpoints**

514 Secondary endpoints will be:

515

- The overall response rate (ORR) according to RECIST 1.1
- Progression free survival (PFS) according to RECIST 1.1
- Safety endpoints include AEs, assessed throughout the trial and evaluated using the NCI-CTCAE version 4.03 (CTCAE v 4.03), clinical laboratory assessments, vital signs, and electrocardiogram (ECG) parameters.

520

### 521 **5.3 Trial Medication Administration and Schedule**

522 The trial Schedule of Assessments is illustrated in Appendix I.

523

#### 524 **5.3.1 Avelumab**

525 Subjects will receive IV infusion of avelumab (10 mg/kg over 1 hour) once every 2 weeks.

526

#### 527 Precautions for Administration:

528 • Premedication: In order to mitigate infusion related reactions, a premedication with an  
529 antihistamine and with paracetamol (acetaminophen) 30 to 60 minutes prior to the first 4  
530 infusions of avelumab is mandatory (for example, 25 50 mg diphenhydramine and 500 650 mg  
531 paracetamol IV or oral). Premedication should be administered for subsequent avelumab  
532 infusions based upon clinical judgment and presence/severity of prior infusion reactions. This may  
533 be modified based on local treatment standards and guidelines, as appropriate.

534 • Setting: Avelumab should be administered in a setting that allows for immediate access to  
535 an intensive care unit or equivalent environment and administration of therapy for anaphylaxis,  
536 such as the ability to implement immediate resuscitation measures. Steroids (dexamethasone 10  
537 mg), epinephrine (1:1,000 dilution), allergy medications (IV antihistamines), bronchodilators, or  
538 equivalents, and oxygen should be available for immediate access.

539 • Observation period: Following avelumab infusions, patients must be observed for 30  
540 minutes post infusion for potential infusion related reactions.

## Studio CAVE (Cetuximab-AVElumab) mCRC

541 The formulation and packaging information of avelumab is provided in Sections 6.1.1 and 6.6,  
542 respectively.

543

### 544 **5.3.2 Cetuximab**

545 Cetuximab will be administered at 1<sup>st</sup> dose at 400 mg/m<sup>2</sup> by i.v.infusion over 120 minutes, directly  
546 after avelumab.

547 The 2<sup>nd</sup> dose and subsequent doses will be performed at 250 mg/ m<sup>2</sup> by i.v.infusion over 60 minutes,  
548 every week and after by avelumab every two weeks.

549 NB: Dilution is not required, but is possible in NaCl 0.9% only, via infusion pump or gravity drip.

550

## 551 **5.4 Dose Modification and Adverse Drug Reactions Requiring Treatment Discontinuation**

552

### 553 **5.4.1 Dose Modification for Avelumab**

554 The dose of avelumab will be calculated based on the weight of the subject determined on the day  
555 prior to or the day of each drug administration.

556 Each subject will stay on the avelumab assigned dose of 10 mg/kg unless treatment needs to be  
557 stopped. There are to be no dose reductions.

558 Dosing modifications (changes in infusion rate) and dose delays are described in Sections 5.4 and  
559 6.4.

560

### 561 **5.4.1.2 Adverse Drug Reactions Requiring Avelumab Discontinuation or Modifications**

562 The following adverse drug reactions (ADRs, see Section 7.9) require permanent treatment  
563 discontinuation of avelumab:

564 • Any Grade 4 ADRs require treatment discontinuation with avelumab except for single  
565 laboratory values out of normal range that are unlikely related to trial treatment as  
566 assessed by the Investigator, do not have any clinical correlate, and resolve within 7 days  
567 with adequate medical management.

568 • Any Grade 3 ADRs require treatment discontinuation with avelumab except for any of the  
569 following:

570 - Transient ( $\leq 6$  hours) Grade 3 flu-like symptoms or fever, which is controlled with medical  
571 management

572 - Transient ( $\leq 24$  hours) Grade 3 fatigue, local reactions, headache, nausea, or emesis that  
573 resolves to Grade  $\leq 1$

574 - Single laboratory values out of normal range (excluding Grade  $\geq 3$  liver function test  
575 increase) that are unlikely related to trial treatment according to the Investigator, do not  
576 have any clinical correlate, and resolve to Grade  $\leq 1$  within 7 days with adequate medical  
577 management

578 - Tumor flare phenomenon defined as local pain, irritation, or rash localized at sites of  
579 known or suspected tumor

580 - Change in Eastern Cooperative Oncology Group Performance Status (ECOG PS) to  $\geq 3$  that  
581 resolves to 2 within 14 days (infusions should not be given on the following cycle, if the  
582 ECOG PS is  $\geq 3$  on the day of trial drug administration)

583

584 Any Grade 2 ADR should be managed as follows:

585 - If a Grade 2 ADR resolves to Grade  $\leq 1$  by the last day of the current cycle, treatment may  
586 continue.

587 - If a Grade 2 ADR does not resolve to Grade  $\leq 1$  by the last day of the current cycle,  
588 infusions should not be given on the following cycle. If at the end of the following cycle the

## Studio CAVE (Cetuximab-AVElumab) mCRC

589 event has not resolved to Grade 1, the subject should permanently discontinue treatment  
 590 with avelumab ADR (except for hormone insufficiencies, that can be managed by  
 591 replacement therapy; for these hormone insufficiencies, up to 2 subsequent doses may be  
 592 omitted).

- 593 - Upon the second occurrence of the same Grade 2 ADR (except for hormone insufficiencies  
 594 that can be managed by replacement therapy) in the same subject, treatment with  
 595 avelumab has to be permanently discontinued.

596  
597

### 5.4.1.3 Infusion-Related Reactions

598 Infusion-related reactions, hypersensitivity reactions (Grades 1 to 4), tumor lysis syndrome, and  
 599 irAEs should be handled according to guidelines in Section 6.3.

600

#### 601 **A. Symptoms**

- 602 - Fever
- 603 - Chills
- 604 - Rigors
- 605 - Diaphoresis
- 606 - Headache

607

#### 608 **B. Management according to Table 3**

609

610

611 **Table 3. Treatment Modification for Symptoms of Infusion-Related Reactions Caused by**  
 612 **Avelumab**

613

| NCI-CTCAE Grade                                                                                                                                                                                                                                                                                                                                                                                                                                                         | Treatment Modification for Avelumab                                                                                                                                                                                    |
|-------------------------------------------------------------------------------------------------------------------------------------------------------------------------------------------------------------------------------------------------------------------------------------------------------------------------------------------------------------------------------------------------------------------------------------------------------------------------|------------------------------------------------------------------------------------------------------------------------------------------------------------------------------------------------------------------------|
| <b>Grade 1 – mild</b><br>Mild transient reaction; infusion interruption not indicated; intervention not indicated.                                                                                                                                                                                                                                                                                                                                                      | Decrease the avelumab infusion rate by 50% and monitor closely for any worsening.                                                                                                                                      |
| <b>Grade 2 – moderate</b><br>Therapy or infusion interruption indicated but responds promptly to symptomatic treatment (for example, antihistamines, NSAIDs, narcotics, IV fluids); prophylactic medications indicated for ≤ 24 h.                                                                                                                                                                                                                                      | Temporarily discontinue avelumab infusion.<br>Resume infusion at 50% of previous rate once infusion-related reaction has resolved or decreased to at least Grade 1 in severity, and monitor closely for any worsening. |
| <b>Grade 3 or Grade 4 – severe or life-threatening</b><br>Grade 3: Prolonged (for example, not rapidly responsive to symptomatic medication and/or brief interruption of infusion); recurrence of symptoms following initial improvement; hospitalization indicated for clinical sequelae.<br>Grade 4: Life-threatening consequences; urgent intervention indicated.                                                                                                    | Stop avelumab infusion immediately and disconnect infusion tubing from the subject.<br>Subjects have to be withdrawn immediately from study avelumab and must not receive any further avelumab treatment.              |
| - If avelumab infusion rate has been decreased by 50% or interrupted due to an infusion reaction, it must remain decreased for the next scheduled infusion. If no infusion reaction is observed in the next scheduled infusion, the infusion rate may be returned to baseline at the subsequent infusions based on investigator's medical judgment.- If hypersensitivity reaction occurs, the subject must be treated according to the best available medical practice. |                                                                                                                                                                                                                        |

614 *IV=intravenous, NCI-CTCAE=National Cancer Institute-Common Terminology Criteria for Adverse Event,*  
 615 *NSAIDs=nonsteroidal anti-inflammatory drugs.*

616  
617

#### 5.4.1.4 Severe Hypersensitivity Reactions and Flu-Like Symptoms

618 If hypersensitivity reaction occurs, the subject must be treated according to the best available  
619 medical practice. A complete guideline for the emergency treatment of anaphylactic reactions  
620 according to the Working Group of the Resuscitation Council (United Kingdom) can be found at  
621 <https://www.resus.org.uk/pages/reaction.pdf>. Subjects should be instructed to report any delayed  
622 reactions to the Investigator immediately.

623

##### A. Symptoms

- 624 - Impaired airway
- 625 - Decreased oxygen saturation (<92%)
- 626 - Confusion
- 627 - Lethargy
- 628 - Hypotension
- 629 - Pale/clammy skin
- 630 - Cyanosis
- 631

632

##### B. Management

- 633 - Epinephrine injection and dexamethasone infusion
- 634 - Subject should be placed on monitor immediately
- 635 - Alert ICU for possible transfer if required
- 636

637 For prophylaxis of flu-like symptoms, 25 mg of indomethacin or comparable nonsteroidal anti-  
638 inflammatory drug (NSAID) dose (for example, ibuprofen 600 mg, naproxen sodium 500mg) may  
639 be administered 2 hours before and 8 hours after the start of each dose of avelumab IV infusion.  
640 Alternative treatments for fever (for example, paracetamol) may be given to subjects at the  
641 discretion of the Investigator.

642

#### 5.4.1.5 Tumor Lysis Syndrome

644 Since avelumab can induce ADCC, there is a potential risk of tumor lysis syndrome. Should this  
645 occur, subjects should be treated per the local guidelines and the management algorithm  
646 published by Howard et al (36) (Figure 1)

647

648

649 **Figure 1. Assessment and Initial Management of Tumor Lysis Syndrome**

## Studio CAVE (Cetuximab-AVElumab) mCRC

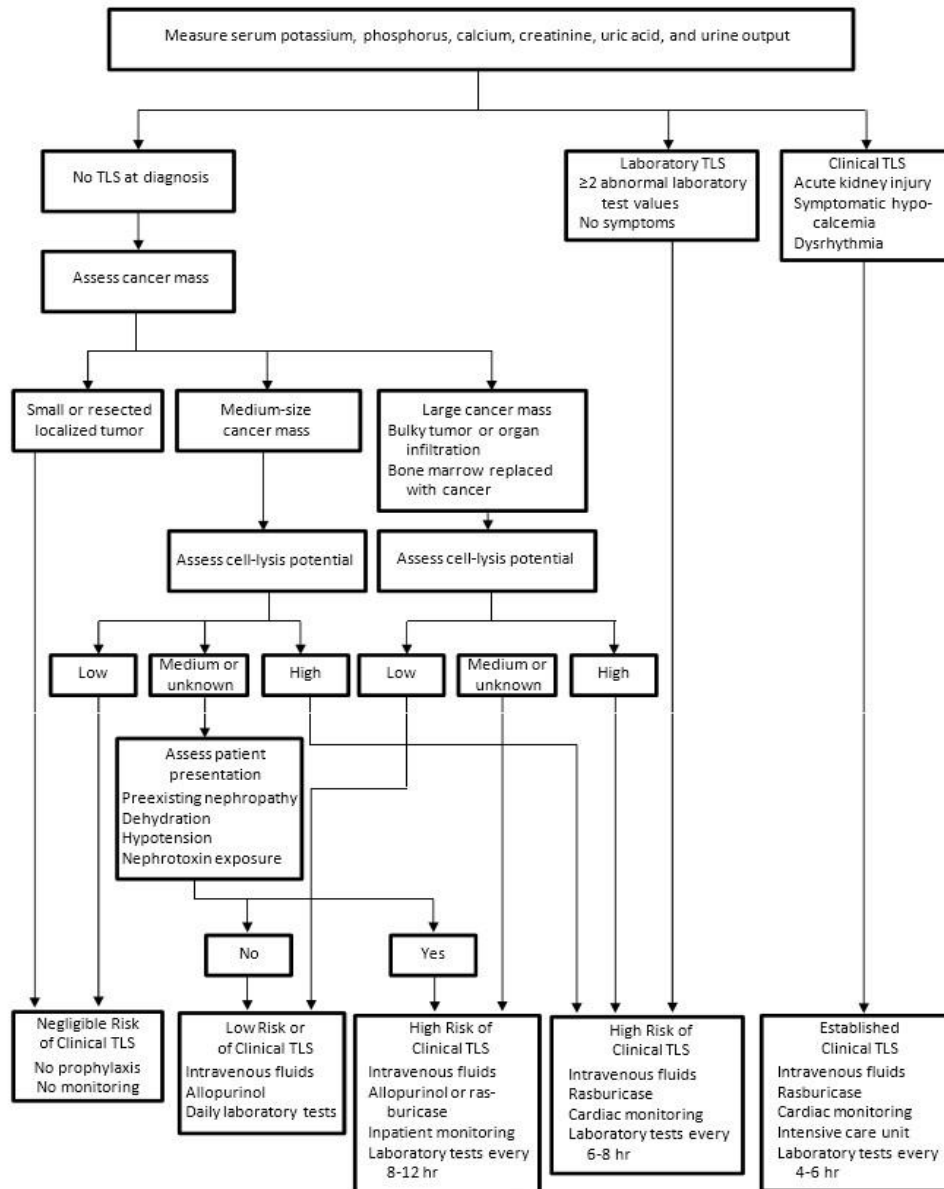

650

651 *TLS=tumor lysis syndrome.*

652

653

654

655

656

### 5.4.1.6 Immune-Related Adverse Events

657

Since inhibition of PD-L1 stimulates the immune system, irAEs may occur. Treatment of irAEs is mainly dependent upon severity (NCI-CTCAE grade):

658

659 - Grade 1 to 2: treat symptomatically or with moderate dose steroids, more frequent  
660 monitoring

661

- Grade 1 to 2 (persistent): manage similar to high grade AE (Grade 3 to 4)

662

- Grade 3 to 4: treat with high dose corticosteroids

663

Treatment of irAEs should follow guidelines set forth in the following Table 4

664

665

**Table 4. Management of Immune-mediated Adverse Reactions**

## Studio CAVE (Cetuximab-AVElumab) mCRC

| Gastrointestinal irAEs                                                                                                                                                                                                                                                    |                                                                                                                                                                                                                                                       |                                                                                                                                                                                                                                                                                                                                                                             |
|---------------------------------------------------------------------------------------------------------------------------------------------------------------------------------------------------------------------------------------------------------------------------|-------------------------------------------------------------------------------------------------------------------------------------------------------------------------------------------------------------------------------------------------------|-----------------------------------------------------------------------------------------------------------------------------------------------------------------------------------------------------------------------------------------------------------------------------------------------------------------------------------------------------------------------------|
| Severity of Diarrhea/Colitis (NCI-CTCAE v4)                                                                                                                                                                                                                               | Initial Management                                                                                                                                                                                                                                    | Follow-up Management                                                                                                                                                                                                                                                                                                                                                        |
| <b>Grade 1</b><br>Diarrhea: < 4 stools/day over Baseline<br>Colitis: asymptomatic                                                                                                                                                                                         | Continue avelumab therapy<br>Symptomatic treatment (e.g. loperamide)                                                                                                                                                                                  | Close monitoring for worsening symptoms<br>Educate subject to report worsening immediately<br>If worsens:<br>Treat as Grade 2, 3 or 4.                                                                                                                                                                                                                                      |
| <b>Grade 2</b><br>Diarrhea: 4 to 6 stools per day over Baseline; IV fluids indicated < 24 hours; not interfering with ADL<br>Colitis: abdominal pain; blood in stool                                                                                                      | Withhold avelumab therapy<br>Symptomatic treatment                                                                                                                                                                                                    | If improves to Grade ≤ 1:<br>Resume avelumab therapy<br><br>If persists > 5-7 days or recurs:<br>Treat as Grade 3 or 4.                                                                                                                                                                                                                                                     |
| <b>Grade 3 to 4</b><br>Diarrhea (Grade 3): ≥ 7 stools per day over Baseline; incontinence; IV fluids ≥ 24 h; interfering with ADL<br>Colitis (Grade 3): severe abdominal pain, medical intervention indicated, peritoneal signs<br>Grade 4: life-threatening, perforation | Withhold avelumab for Grade 3.<br>Permanently discontinue avelumab for Grade 4 or recurrent Grade 3.<br><br>1.0 to 2.0 mg/kg/day prednisone IV or equivalent<br>Add prophylactic antibiotics for opportunistic infections<br>Consider lower endoscopy | If improves:<br>Continue steroids until Grade ≤ 1, then taper over at least 1 month; resume avelumab therapy following steroids taper (for initial Grade 3).<br><br>If worsens, persists > 3 to 5 days, or recurs after improvement:<br>Add infliximab 5mg/kg (if no contraindication). Note: infliximab should not be used in cases of perforation or sepsis.              |
| Dermatological irAEs                                                                                                                                                                                                                                                      |                                                                                                                                                                                                                                                       |                                                                                                                                                                                                                                                                                                                                                                             |
| Grade of Rash (NCI-CTCAE v4)                                                                                                                                                                                                                                              | Initial Management                                                                                                                                                                                                                                    | Follow-up Management                                                                                                                                                                                                                                                                                                                                                        |
| <b>Grade 1 to 2</b><br>Covering ≤ 30% body surface area                                                                                                                                                                                                                   | Continue avelumab therapy<br>Symptomatic therapy (for example, antihistamines, topical steroids)                                                                                                                                                      | If persists > 1 to 2 weeks or recurs:<br>Withhold avelumab therapy<br>Consider skin biopsy<br><br>Consider 0.5-1.0 mg/kg/day prednisone or equivalent. Once improving, taper steroids over at least 1 month, consider prophylactic antibiotics for opportunistic infections, and resume avelumab therapy following steroids taper.<br>If worsens:<br>Treat as Grade 3 to 4. |
| <b>Grade 3 to 4</b><br>Grade 3: Covering > 30% body surface area;<br>Grade 4: Life threatening                                                                                                                                                                            | Withhold avelumab for Grade 3.<br>Permanently discontinue for Grade 4 or recurrent Grade 3.<br>Consider skin biopsy                                                                                                                                   | If improves to Grade ≤ 1:<br>Taper steroids over at least 1 month; resume avelumab therapy following steroids taper (for initial Grade 3).                                                                                                                                                                                                                                  |

## Studio CAVE (Cetuximab-AVElumab) mCRC

| consequences                                                                                                | Dermatology consult<br>1.0 to 2.0 mg/kg/day prednisone or equivalent<br>Add prophylactic antibiotics for opportunistic infections                                                                                                                                              |                                                                                                                                                                                                                                                                  |
|-------------------------------------------------------------------------------------------------------------|--------------------------------------------------------------------------------------------------------------------------------------------------------------------------------------------------------------------------------------------------------------------------------|------------------------------------------------------------------------------------------------------------------------------------------------------------------------------------------------------------------------------------------------------------------|
| Pulmonary irAEs                                                                                             |                                                                                                                                                                                                                                                                                |                                                                                                                                                                                                                                                                  |
| Grade of Pneumonitis (NCI-CTCAE v4)                                                                         | Initial Management                                                                                                                                                                                                                                                             | Follow-up Management                                                                                                                                                                                                                                             |
| <b>Grade 1</b><br>Radiographic changes only                                                                 | Consider withholding avelumab therapy<br>Monitor for symptoms every 2 to 3 days<br>Consider Pulmonary and Infectious Disease consults                                                                                                                                          | Re-assess at least every 3 weeks<br>If worsens:<br>Treat as Grade 2 or Grade 3 to 4.                                                                                                                                                                             |
| <b>Grade 2</b><br>Mild to moderate new symptoms                                                             | Withhold avelumab therapy<br>Pulmonary and Infectious Disease consults<br>Monitor symptoms daily; consider hospitalization<br>1.0 to 2.0 mg/kg/day prednisone or equivalent<br>Add prophylactic antibiotics for opportunistic infections<br>Consider bronchoscopy, lung biopsy | Re-assess every 1 to 3 days<br>If improves:<br>When symptoms return to Grade $\leq$ 1, taper steroids over at least 1 month, and then resume avelumab therapy following steroids taper<br>If not improving after 2 weeks or worsening:<br>Treat as Grade 3 to 4. |
| <b>Grade 3 to 4</b><br>Grade 3: Severe new symptoms;<br>New/worsening hypoxia;<br>Grade 4: Life-threatening | Permanently discontinue avelumab therapy.<br>Hospitalize.<br>Pulmonary and Infectious Disease consults.<br>1.0 to 2.0 mg/kg/day prednisone or equivalent<br>Add prophylactic antibiotics for opportunistic infections<br>Consider bronchoscopy, lung biopsy                    | If improves to Grade $\leq$ 1:<br>Taper steroids over at least 1 month<br>If not improving after 48 hours or worsening:<br>Add additional immunosuppression (for example, infliximab, cyclophosphamide, IV immunoglobulin, or mycophenolatemofetil)              |
| Hepatic irAEs                                                                                               |                                                                                                                                                                                                                                                                                |                                                                                                                                                                                                                                                                  |
| Grade of Liver Test Elevation (NCI-CTCAE v4)                                                                | Initial Management                                                                                                                                                                                                                                                             | Follow-up Management                                                                                                                                                                                                                                             |
| <b>Grade 1</b><br>Grade 1 AST or ALT > ULN to 3.0 x ULN and/or Total bilirubin > ULN to 1.5 x ULN           | Continue avelumab therapy                                                                                                                                                                                                                                                      | Continue liver function monitoring<br>If worsens:<br>Treat as Grade 2 or 3 to 4.                                                                                                                                                                                 |
| <b>Grade 2</b><br>AST or ALT > 3.0 to $\leq$ 5 x ULN and/or total bilirubin > 1.5 to $\leq$ 3 x ULN         | Withhold avelumab therapy<br>Increase frequency of monitoring to every 3 days.                                                                                                                                                                                                 | If returns to Grade $\leq$ 1:<br>Resume routine monitoring; resume avelumab therapy.<br>If elevation persists > 5 to 7 days or worsens:                                                                                                                          |



## Studio CAVE (Cetuximab-AVElumab) mCRC

|                                                                                                                                                                        |                                                                                                                                                                                                                                                                                                                                                |                                                                                                                                                                                                                                                                                               |
|------------------------------------------------------------------------------------------------------------------------------------------------------------------------|------------------------------------------------------------------------------------------------------------------------------------------------------------------------------------------------------------------------------------------------------------------------------------------------------------------------------------------------|-----------------------------------------------------------------------------------------------------------------------------------------------------------------------------------------------------------------------------------------------------------------------------------------------|
|                                                                                                                                                                        |                                                                                                                                                                                                                                                                                                                                                | Treat as Grade 3 to 4.                                                                                                                                                                                                                                                                        |
| <b>Grade 3 to 4</b><br>AST or ALT > 5 x ULN and/or total bilirubin > 3 x ULN                                                                                           | Permanently discontinue avelumab therapy<br>Increase frequency of monitoring to every 1 to 2 days<br>1.0 to 2.0 mg/kg/day prednisone or equivalent<br>Add prophylactic antibiotics for opportunistic infections<br>Consult gastroenterologist/hepatologist<br>Consider obtaining MRI/CT scan of liver and liver biopsy if clinically warranted | If returns to Grade ≤ 1:<br>Taper steroids over at least 1 month<br>If does not improve in > 3 to 5 days, worsens or rebounds:<br>Add mycophenolatemofetil 1 gram (g) twice daily<br>If no response within an additional 3 to 5 days, consider other immunosuppressants per local guidelines. |
| <b>Renal irAEs</b>                                                                                                                                                     |                                                                                                                                                                                                                                                                                                                                                |                                                                                                                                                                                                                                                                                               |
| <b>Grade of Creatinine Increased (NCI-CTCAE v4)</b>                                                                                                                    | <b>Initial Management</b>                                                                                                                                                                                                                                                                                                                      | <b>Follow-up Management</b>                                                                                                                                                                                                                                                                   |
| <b>Grade 1</b><br>Creatinine increased > ULN to 1.5 x ULN                                                                                                              | Continue avelumab therapy                                                                                                                                                                                                                                                                                                                      | Continue renal function monitoring<br>If worsens:<br>Treat as Grade 2 to 3 or 4.                                                                                                                                                                                                              |
| <b>Grade 2 to 3</b><br>Creatinine increased > 1.5 and ≤ 6 x ULN                                                                                                        | Withhold avelumab therapy<br>Increase frequency of monitoring to every 3 days<br>1.0 to 2.0 mg/kg/day prednisone or equivalent.<br>Add prophylactic antibiotics for opportunistic infections<br>Consider renal biopsy                                                                                                                          | If returns to Grade ≤1:<br>Taper steroids over at least 1 month, and resume avelumab therapy following steroids taper.<br>If worsens:<br>Treat as Grade 4.                                                                                                                                    |
| <b>Grade 4</b><br>Creatinine increased > 6 x ULN                                                                                                                       | Permanently discontinue avelumab therapy<br>Monitor creatinine daily<br>1.0 to 2.0 mg/kg/day prednisone or equivalent.<br>Add prophylactic antibiotics for opportunistic infections<br>Consider renal biopsy<br>Nephrology consult                                                                                                             | If returns to Grade ≤1:<br>Taper steroids over at least 1 month.                                                                                                                                                                                                                              |
| <b>Cardiac irAEs</b>                                                                                                                                                   |                                                                                                                                                                                                                                                                                                                                                |                                                                                                                                                                                                                                                                                               |
| <b>Myocarditis</b>                                                                                                                                                     | <b>Initial Management</b>                                                                                                                                                                                                                                                                                                                      | <b>Follow-up Management</b>                                                                                                                                                                                                                                                                   |
| New onset of cardiac signs or symptoms and / or new laboratory cardiac biomarker elevations (e.g. troponin, CK-MB, BNP) or cardiac imaging abnormalities suggestive of | Withhold avelumab therapy.<br>Hospitalize.<br>In the presence of life threatening cardiac decompensation, consider transfer to a facility experienced in advanced heart failure and arrhythmia management.                                                                                                                                     | If symptoms improve and immune-mediated etiology is ruled out, re-start avelumab therapy.<br><br>If symptoms do not improve/worsen, viral myocarditis is                                                                                                                                      |

## Studio CAVE (Cetuximab-AVElumab) mCRC

|                             |                                                                                                                                                                                                                                     |                                                                                                                                                                          |
|-----------------------------|-------------------------------------------------------------------------------------------------------------------------------------------------------------------------------------------------------------------------------------|--------------------------------------------------------------------------------------------------------------------------------------------------------------------------|
| myocarditis.                | Cardiology consult to establish etiology and rule-out immune-mediated myocarditis.<br>Guideline based supportive treatment as per cardiology consult.*<br><br>Consider myocardial biopsy if recommended per cardiology consult.     | excluded, and immune-mediated etiology is suspected or confirmed following cardiology consult, manage as immune-mediated myocarditis.                                    |
| Immune-mediated myocarditis | Permanently discontinue avelumab.<br>Guideline based supportive treatment as appropriate as per cardiology consult.*<br>1.0 to 2.0 mg/kg/day prednisone or equivalent<br>Add prophylactic antibiotics for opportunistic infections. | Once improving, taper steroids over at least 1 month.<br><br>If no improvement or worsening, consider additional immunosuppressants (e.g. azathioprine, cyclosporine A). |

\*Local guidelines, or eg. ESC or AHA guidelines

ESC guidelines website: <https://www.escardio.org/Guidelines/Clinical-Practice-Guidelines>

AHA guidelines website: <http://professional.heart.org/professional/GuidelinesStatements/searchresults.jsp?q=&y=&t=1001>

### Endocrine irAEs

| Endocrine Disorder                                                                                                            | Initial Management                                                                                                                                                                                                                                                                                                                                                                         | Follow-up Management                                                                                                                                                                                                               |
|-------------------------------------------------------------------------------------------------------------------------------|--------------------------------------------------------------------------------------------------------------------------------------------------------------------------------------------------------------------------------------------------------------------------------------------------------------------------------------------------------------------------------------------|------------------------------------------------------------------------------------------------------------------------------------------------------------------------------------------------------------------------------------|
| <b>Grade 1 or Grade 2 endocrinopathies (hypothyroidism, hyperthyroidism, adrenal insufficiency, type I diabetes mellitus)</b> | Continue avelumab therapy<br>Endocrinology consult if needed<br><br>Start thyroid hormone replacement therapy (for hypothyroidism), anti-thyroid treatment (for hyperthyroidism), corticosteroids (for adrenal insufficiency) or insulin (for Type I diabetes mellitus) as appropriate.<br><br>Rule-out secondary endocrinopathies (i.e. hypopituitarism / hypophysitis)                   | Continue hormone replacement/suppression and monitoring of endocrine function as appropriate.                                                                                                                                      |
| <b>Grade 3 or Grade 4 endocrinopathies (hypothyroidism, hyperthyroidism, adrenal insufficiency, type I diabetes mellitus)</b> | Withhold avelumab therapy<br>Consider hospitalization<br>Endocrinology consult<br><br>Start thyroid hormone replacement therapy (for hypothyroidism), anti-thyroid treatment (for hyperthyroidism), corticosteroids (for adrenal insufficiency) or insulin (for type I diabetes mellitus) as appropriate.<br><br>Rule-out secondary endocrinopathies (i.e. hypopituitarism / hypophysitis) | Resume avelumab once symptoms and/or laboratory tests improve to Grade ≤ 1 (with or without hormone replacement/suppression).<br><br>Continue hormone replacement/suppression and monitoring of endocrine function as appropriate. |
| <b>Hypopituitarism/Hypophysitis (secondary endocrinopathies)</b>                                                              | If secondary thyroid and/or adrenal insufficiency is confirmed (i.e. subnormal serum FT4 with inappropriately low TSH and/or low serum cortisol with inappropriately low ACTH) :<br><br><ul style="list-style-type: none"> <li>Refer to endocrinologist for dynamic testing as indicated and measurement of other hormones (FSH, LH, GH/IGF-1,</li> </ul>                                  | Resume avelumab once symptoms and hormone tests improve to Grade ≤ 1 (with or without hormone replacement).<br><br>In addition, for hypophysitis with abnormal MRI, resume avelumab only once shrinkage of the pituitary           |

## Studio CAVE (Cetuximab-AVElumab) mCRC

|                                                                                                     | <p>PRL, testosterone in men, estrogens in women)</p> <ul style="list-style-type: none"> <li>Hormone replacement/suppressive therapy as appropriate</li> <li>Perform pituitary MRI and visual field examination as indicated</li> </ul> <p><b>If hypophysitis confirmed:</b></p> <ul style="list-style-type: none"> <li>Continue avelumab if mild symptoms with normal MRI. Repeat the MRI in 1 month</li> <li>Withhold avelumab if moderate, severe or life-threatening symptoms of hypophysitis and/or abnormal MRI. Consider hospitalization. Initiate corticosteroids (1 to 2 mg/kg/day prednisone or equivalent) followed by corticosteroids taper during at least 1 month.</li> <li>Add prophylactic antibiotics for opportunistic infections.</li> </ul> | <p>gland on MRI/CT scan is documented.</p> <p>Continue hormone replacement/suppression therapy as appropriate.</p>                                                    |
|-----------------------------------------------------------------------------------------------------|----------------------------------------------------------------------------------------------------------------------------------------------------------------------------------------------------------------------------------------------------------------------------------------------------------------------------------------------------------------------------------------------------------------------------------------------------------------------------------------------------------------------------------------------------------------------------------------------------------------------------------------------------------------------------------------------------------------------------------------------------------------|-----------------------------------------------------------------------------------------------------------------------------------------------------------------------|
| <b>Other irAEs (not described above)</b>                                                            |                                                                                                                                                                                                                                                                                                                                                                                                                                                                                                                                                                                                                                                                                                                                                                |                                                                                                                                                                       |
| Grade of other irAEs (NCI-CTCAE v4)                                                                 | Initial Management                                                                                                                                                                                                                                                                                                                                                                                                                                                                                                                                                                                                                                                                                                                                             | Follow-up Management                                                                                                                                                  |
| <b>Grade 2 or Grade 3 clinical signs or symptoms suggestive of a potential irAE</b>                 | Withhold avelumab therapy pending clinical investigation                                                                                                                                                                                                                                                                                                                                                                                                                                                                                                                                                                                                                                                                                                       | If irAE is ruled out, manage as appropriate according to the diagnosis and consider re-starting avelumab therapy<br>If irAE is confirmed, treat as Grade 2 or 3 irAE. |
| <b>Grade 2 irAE or first occurrence of Grade 3 irAE</b>                                             | Withhold avelumab therapy<br>1.0 to 2.0 mg/kg/day prednisone or equivalent<br>Add prophylactic antibiotics for opportunistic infections<br>Specialty consult as appropriate                                                                                                                                                                                                                                                                                                                                                                                                                                                                                                                                                                                    | If improves to Grade ≤ 1:<br>Taper steroids over at least 1 month and resume avelumab therapy following steroids taper.                                               |
| <b>Recurrence of same Grade 3 irAEs</b>                                                             | Permanently discontinue avelumab therapy<br>1.0 to 2.0 mg/kg/day prednisone or equivalent<br>Add prophylactic antibiotics for opportunistic infections<br>Specialty consult as appropriate                                                                                                                                                                                                                                                                                                                                                                                                                                                                                                                                                                     | If improves to Grade ≤ 1:<br>Taper steroids over at least 1 month.                                                                                                    |
| <b>Grade 4</b>                                                                                      | Permanently discontinue avelumab therapy<br>1.0 to 2.0 mg/kg/day prednisone or equivalent and/or other immunosuppressant as needed<br>Add prophylactic antibiotics for opportunistic infections<br>Specialty consult.                                                                                                                                                                                                                                                                                                                                                                                                                                                                                                                                          | If improves to Grade ≤ 1:<br>Taper steroids over at least 1 month                                                                                                     |
| <b>Requirement for 10 mg per day or greater prednisone or equivalent for more than 12 weeks for</b> | Permanently discontinue avelumab therapy<br>Specialty consult                                                                                                                                                                                                                                                                                                                                                                                                                                                                                                                                                                                                                                                                                                  |                                                                                                                                                                       |

## Studio CAVE (Cetuximab-AVElumab) mCRC

|                                                                   |  |  |
|-------------------------------------------------------------------|--|--|
| reasons other than hormonal replacement for adrenal insufficiency |  |  |
| Persistent Grade 2 or 3 irAE lasting 12 weeks or longer           |  |  |

666 Abbreviations: ACTH=adrenocorticotropic hormone; ADL=activities of daily living; ALT=alanine aminotransferase;  
667 AST=aspartate aminotransferase; BNP=B-type natriuretic peptide; CK-MB=creatin kinase MB; CT= computed  
668 tomography; FSH=follicle-stimulating hormone; GH=growth hormone; IGF-1=insulin-like growth factor 1; irAE=immune  
669 related adverse event; IV=intravenous; LH=luteinizing hormone; MRI=magnetic resonance imaging; NCI  
670 CTCAE=National Cancer Institute Common Terminology Criteria for Adverse Events; PRL=prolactin;T4=thyroxine;  
671 TSH=thyroid stimulating hormone; ULN=upper limit of normal.

672

### 673 5.4.2 Dose Modification and Discontinuation for Cetuximab

674 The dose of Cetuximab will be calculated based on the Body Surface Area of the subject  
675 determined on the day prior to or the day of each drug administration. Each subject will stay on  
676 the Cetuximab assigned dose unless treatment modification needs to be performed. Dose  
677 modifications and dose delays are described in the following Section.

678

#### 679 5.4.2.1 Adverse Drug Reaction Requiring Cetuximab Discontinuation or Modifications

680

##### 681 5.4.2.1.2 Skin Toxicity

682 The most common AEs associated with Cetuximab administration are skin reactions, particularly  
683 acne-like rash. Skin reactions to Cetuximab may be considered as being in 3 phases. The first, early  
684 phase (1-4 weeks) is a moist acneiform phase which is usually responsive to tetracyclines and/or  
685 retinoids. Limiting sun exposure may be useful. Drying agents may be of value. The second phase is a  
686 dry skin phase, seldom troublesome, which usually responds well to emollients or petroleum jelly.

687 If started, drying agents should be discontinued. The third phase also included skin fissuring and nail  
688 changes. Skin fissures are best treated with cyanoacrylate or other adhesives and strong tape until  
689 healed.

690 If a patient experiences a Grade 3 skin toxicity (as defined in the US National Cancer Institute's -  
691 Common Toxicity Criteria - NCI-CTC- Version 3.0), Cetuximab therapy may be deferred for up to two  
692 consecutive infusions without changing the dose level. The investigator should also consider  
693 concomitant treatment with topical and/or oral antibiotics. Topical corticosteroids are not  
694 recommended. If the toxicity resolves to Grade 2 or less by the following treatment period, the  
695 treatment may resume.

696 With the second and third occurrences of a Grade 3 skin toxicity, Cetuximab therapy may again be  
697 deferred for up to two consecutive weeks with concomitant dose reductions to 200 mg/m<sup>2</sup> and 150  
698 mg/m<sup>2</sup>, respectively. Cetuximab dose reductions are permanent. Patients should discontinue  
699 Cetuximab if more than two consecutive infusions are withheld or a fourth occurrence of a Grade 3  
700 skin toxicity occurs despite an appropriate dose reduction (Figure 2).

701

702

703

704

705 **Figure 2. Treatment adjustment in case of Grade 3 skin toxicity considered to be related to**  
706 **Cetuximab.**

707  
708  
709  
710  
711  
712  
713  
714  
715  
716  
717  
718  
719  
720  
721  
722  
723  
724  
725  
726  
727  
728  
729  
730  
731  
732  
733  
734  
735  
736

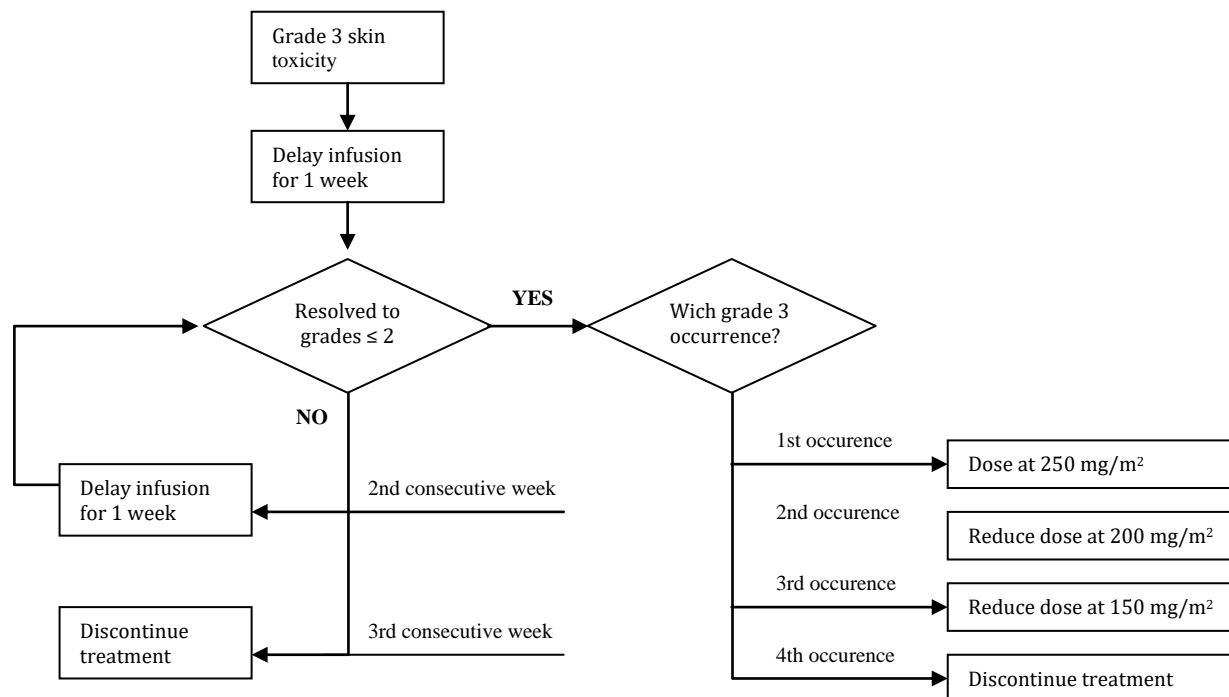

**5.4.2.1.3 Allergic/Hypersensitivity Reactions**

Allergic/hypersensitivity reactions may occur during or following the administration of Cetuximab. Patients must therefore be pretreated with an appropriate antihistamine and acetaminophen before infusions. If should an allergic/hypersensitivity or infusion reaction to Cetuximab occur, then the patient must be treated according to the best available medical practices. Grade 3 or 4 allergic/hypersensitivity reactions require immediate interruption of the Cetuximab infusion, appropriate medical measures and permanent discontinuation of treatment. Patients should be carefully monitored until the complete resolution of all signs and symptoms (Table 5).

**Table 5. Treatment adjustment for Cetuximab caused Allergic/Hypersensitivity Reaction**

| CTC Grade                                                                                                                              | Treatment                                                                                                                                                                                                                                                            |
|----------------------------------------------------------------------------------------------------------------------------------------|----------------------------------------------------------------------------------------------------------------------------------------------------------------------------------------------------------------------------------------------------------------------|
| <b>Grade 1</b><br>Transient flushing or rash, drug fever <38°C                                                                         | Decrease the Cetuximab infusion rate by 50% and monitor closely for any worsening                                                                                                                                                                                    |
| <b>Grade 2</b><br>Rash; flushing; urticaria; dyspnea; drugfever ≥ 38°C                                                                 | Stop Cetuximab infusion<br>Administer bronchodilators, oxygen etc. as medically indicated<br>Resume infusion at 50% of previous rate once allergic/hypersensitivity reaction has resolved or decreased to grade 1 in severity, and monitor closely for any worsening |
| <b>Grade 3 or Grade 4</b><br><br>Grade3:<br>Symptomatic bronchospasm, with or without urticaria;<br>parenteral medication(s)indicated; | Stop Cetuximab infusion immediately and disconnect infusion tubing from the patient<br>Administer epinephrine, bronchodilators, antihistamines, glucocorticoids, intravenous fluids, vasopressor agents, oxygen etc., as                                             |

## Studio CAVE (Cetuximab-AVElumab) mCRC

|                                |                   |                                                                                                               |
|--------------------------------|-------------------|---------------------------------------------------------------------------------------------------------------|
| allergy-related<br>hypotension | edema/angioedema; | medically indicated                                                                                           |
| Grade 4: Anaphylaxis           |                   | Patients have to be withdrawn immediately from treatment and must not receive any further Cetuximab treatment |

737

738 Once a Cetuximab infusion rate has been decreased due to an allergic/hypersensitivity reaction, it  
739 will remain decreased for all subsequent infusions. If the patient has a second  
740 allergic/hypersensitivity reaction with the slower infusion rate, the infusion should be stopped, and  
741 the patient should continue on chemotherapy alone. The patient must not receive any further  
742 cetuximab treatment.

743 If a subject experiences a Grade 3 or 4-allergic/hypersensitivity reaction at any time, Cetuximab  
744 should be discontinued.

745

### 746 5.4.2.1.4 Infusion-Related Reactions

747 Infusion reactions of Grade 1 and 2 severity may be treated with appropriate antihistamines,  
748 corticosteroid and by slowing the Cetuximab infusion rate to deliver the volume in 4 hours (but no  
749 longer). Infusion reactions of Grade 3 or higher should be managed with appropriate agents,  
750 including volume expanders, epinephrine, glucocorticoids and other agents as appropriate.  
751 Cetuximab should be immediately and permanently discontinued.

752

### 753 5.4.2.1.5 Other Considerations

754 A. **Interstitial Pneumonitis:** severe interstitial pneumonitis has been described in subjects  
755 treated with the EGFR-pathway targeting therapy gefitinib. To date, no increased risk of  
756 interstitial pneumonitis has been identified with Cetuximab. Nevertheless, all subjects must  
757 have adequate chest imaging prior to commencing Cetuximab therapy in the study, as a  
758 safety precaution in order to document the baseline pulmonary condition. If there are  
759 respiratory symptoms at study entry, lung function tests and further diagnostic procedures  
760 must also be undertaken in order to diagnose pre-existing pulmonary fibrosis or interstitial  
761 pneumonitis. Furthermore, subjects will be regularly questioned about pulmonary symptoms  
762 during the study. Should pulmonary symptoms appear or worsen during or after Cetuximab  
763 treatment, a detailed description is required and investigators should use their discretion in  
764 ordering such diagnostic procedures as are necessary to elicit an accurate diagnosis.

765 B. **Electrolyte Disturbances:** progressively decreasing serum magnesium levels have been  
766 observed leading to severe hypomagnesemia in some patients. Hypomagnesaemia is  
767 reversible following discontinuation of cetuximab. Depending on severity, other electrolyte  
768 disturbances, mainly hypocalcaemia or hypokalaemia, have also been observed.  
769 Determination of serum electrolyte levels is recommended prior to and periodically during  
770 Erbitux<sup>®</sup> treatment. Electrolyte repletion is recommended, as appropriate.

771 C. **Other Reasons for Cetuximab Discontinuation:** if a patient develops an intercurrent illness  
772 (i.e., infection) that, in the opinion of the investigator mandates interruption of Cetuximab  
773 therapy, that intercurrent illness must resolve within a time frame such that no more than  
774 two, weekly, infusions are withheld. After the interruption of treatment, the subject will  
775 continue with a Cetuximab dose of 250 mg/m<sup>2</sup> every week at subsequent visits or the last  
776 dose before the interruption if there have been previous dose reductions

777

## Studio CAVE (Cetuximab-AVElumab) mCRC

778

### 779 **5.5 Selection of Trial Population**

780 Only persons meeting all inclusion criteria and no exclusion criteria may be enrolled into the trial  
781 as subjects. Prior to performing any trial assessments not part of the subject's routine medical  
782 care, the Investigator will ensure that the subject or the subject's legal representative has  
783 provided written informed consent following the procedure described in Section 9.2.

784

#### 785 **5.5.1 Inclusion and Exclusion Criteria**

786

##### 787 **Inclusion Criteria**

788 For inclusion in the trial, all of the following inclusion criteria must be fulfilled:

- 789 1. Signed written informed consent before any trial-related procedure is undertaken that is not  
790 part of the standard patient management
- 791 2. Male or female subjects aged  $\geq 18$  years
- 792 3. Histologically proven diagnosis of colorectal adenocarcinoma.
- 793 4. Diagnosis of metastatic disease
- 794 5. RAS (NRAS and KRAS exon 2,3 and 4) wild-type in tissue at initial diagnosis.
- 795 6. Efficacy of a first line therapy containing an anti-EGFR agent (panitumumab or cetuximab) with  
796 a major response achieved (complete or partial response).
- 797 7. A second line therapy.
- 798 8. More than 4 months from last dose of anti-EGFR agent administered in first line treatment  
799 before randomization.
- 800 9. Measurable disease according to RECIST criteria v1.1
- 801 10. ECOG PS of 0 to 1 at trial entry
- 802 11. Estimated life expectancy of more than 12 weeks
- 803 12. Adequate hematological function defined by white blood cell (WBC) count  $\geq 2.5 \times 10^9/L$  with  
804 absolute neutrophil count (ANC)  $\geq 1.5 \times 10^9/L$ , lymphocyte count  $\geq 0.5 \times 10^9/L$ , platelet count  $\geq$   
805  $100 \times 10^9/L$ , and hemoglobin  $\geq 9$  g/dL (may have been transfused)
- 806 13. Adequate hepatic function defined by a total bilirubin level  $\leq 1.5 \times$  the upper limit of normal  
807 (ULN) range and AST and alanine aminotransferase (ALT) levels  $\leq 2.5 \times$  ULN for all subjects or AST  
808 and ALT levels  $\leq 5 \times$  ULN (for subjects with documented metastatic disease to the liver).
- 809 14. Adequate renal function defined by an estimated creatinine clearance  $> 30$  mL/min according  
810 to the Cockcroft-Gault formula (or local institutional standard method)
- 811 15. Effective contraception for both male and female subjects if the risk of conception exists  
812 (Note: The effects of the trial drug on the developing human fetus are unknown; thus, women of  
813 childbearing potential and men must agree to use effective contraception, defined as 2 barrier  
814 methods, or 1 barrier method with a spermicide, an intrauterine device, or use of oral female  
815 contraceptive. Should a woman become pregnant or suspect she is pregnant while she or her  
816 partner is participating in this trial, the treating physician should be informed immediately.)  
817 Highly effective contraception for both male and female subjects throughout the study and for at  
818 least 30 days after last avelumab treatment administration if the risk of conception exists.
- 819 16. No prior immunotherapy

820

##### 821 **Exclusion Criteria**

822 Subjects are not eligible for this trial if they fulfill any of the following exclusion criteria:

- 823 1. Any contraindication to cetuximab and/or avelumab.
- 824 2. Past or current history of malignancies other than colorectal carcinoma, except for curatively  
825 treated basal and squamous cell carcinoma of the skin or in situ carcinoma of the cervix.

## Studio CAVE (Cetuximab-AVElumab) mCRC

- 826 3.Pregnancy
- 827 4.Breastfeeding
- 828 5.Participation in a clinical study or experimental drug treatment within 30 days.
- 829 6.Subjects receiving immunosuppressive agents (such as steroids) for any reason should be
- 830 tapered off these drugs before initiation of the trial treatment, with the exception of:
- 831 -subjects with adrenal insufficiency, who may continue corticosteroids at physiologic replacement
- 832 dose, equivalent to  $\leq 10$  mg prednisone daily
- 833 -intranasal, inhaled, topical steroids,
- 834 -local steroid injection (e.g., intra-articular injection)
- 835 -Systemic corticosteroids at physiologic doses  $\leq 10$  mg/day of prednisone or equivalent
- 836 -Steroids as premedication for hypersensitivity reactions (e.g., CT scan premedication)
- 837 7.All subjects with brain metastases, except those meeting the following criteria:
- 838 -Brain metastases have been treated locally, and
- 839 -No ongoing neurological symptoms that are related to the brain localization of the disease
- 840 (sequelae that are a consequence of the treatment of the brain metastases are acceptable)
- 841 8.Prior organ transplantation, including allogeneic stem-cell transplantation
- 842 9.Significant acute or chronic infections including, among others:
- 843 -Known history of testing positive test for human immunodeficiency virus (HIV) or known acquired
- 844 immunodeficiency syndrome
- 845 -Hepatitis B virus (HBV) or hepatitis C virus (HCV) infection at screening (positive HBV surface
- 846 antigen or HCV RNA if anti-HCV antibody screening test positive)
- 847 10.Active autoimmune disease that might deteriorate when receiving an immunostimulatory
- 848 agent:
- 849 -Subjects with diabetes type I, vitiligo, psoriasis, hypo- or hyperthyroid disease not requiring
- 850 immunosuppressive treatment are eligible
- 851 -Subjects requiring hormone replacement with corticosteroids are eligible if the steroids are
- 852 administered only for the purpose of hormonal replacement and at doses  $\leq 10$  mg or equivalent
- 853 prednisone per day.
- 854 -Administration of steroids through a route known to result in a minimal systemic exposure
- 855 (topical, intranasal, intro-ocular, or inhalation) are acceptable.
- 856 -Active infection requiring systemic therapy.
- 857 11.Previous or ongoing administration of systemic steroids for the management of an acute
- 858 allergic phenomenon is acceptable as long as it is anticipated that the administration of steroids
- 859 will be completed in 14 days, or that the daily dose after 14 days will be  $\leq 10$  mg per day of
- 860 equivalent prednisone.
- 861 12.Known severe hypersensitivity to investigational product or any component in its formulations,
- 862 including known severe hypersensitivity reactions to monoclonal antibodies (NCI CTCAE v4.03
- 863 Grade  $\geq 3$ ), any history of anaphylaxis, or uncontrolled asthma (that is, 3 or more features of
- 864 partially controlled asthma).
- 865 13.History of hypersensitivity to Polysorbate 80 that led to unacceptable toxicity requiring
- 866 treatment cessation
- 867 14.Persisting toxicity related to prior therapy of Grade  $> 1$  NCI-CTCAE v 4.03.
- 868 15. Known alcohol or drug abuse.
- 869 16. Clinically significant (that is active) cardiovascular disease: cerebral vascular accident/stroke
- 870 ( $<6$  months prior to enrollment), myocardial infarction ( $<6$  months prior to enrollment), unstable
- 871 angina, congestive heart failure (New York Heart Association Classification Class $\geq$ II), or serious
- 872 uncontrolled cardiac arrhythmia requiring medication



## Studio CAVE (Cetuximab-AVElumab) mCRC

873 17. Other severe acute or chronic medical conditions including immune colitis, inflammatory bowel  
874 disease, immune pneumonitis, pulmonary fibrosis or psychiatric conditions including recent  
875 (within the past year) or active suicidal ideation or behavior; or laboratory abnormalities that may  
876 increase the risk associated with study participation or study treatment administration or may  
877 interfere with the interpretation of study results and, in the judgment of the investigator, would  
878 make the patient inappropriate for entry into this study.

879 18. Any psychiatric condition that would prohibit the understanding or rendering of informed  
880 consent.

881 19. Vaccination within 4 weeks of the first dose of avelumab and cetuximab and while on  
882 treatment is prohibited except for administration of inactivated vaccine (i.e. inactivated influenza  
883 vaccine)

884 20. Legal incapacity or limited legal capacity.

885

886

### 887 **5.6 Criteria for Subject Withdrawal**

888

#### 889 **5.6.1 Criteria for Withdrawal from Trial Treatment**

890 Subjects will be withdrawn from trial treatment for any of the following reasons:

891 - PD per RECIST 1.1 (subjects receiving avelumab plus cetuximab treatment may continue  
892 past the initial determination of disease progression if the subject's ECOG PS has remained  
893 stable, and if in the opinion of the Investigator, the subject will benefit from continued  
894 treatment)

895 - Significant clinical deterioration (clinical progression), defined as new symptoms that are  
896 deemed by the Investigator to be clinically significant or significant worsening of existing  
897 symptoms

898 - Unacceptable toxicity

899 - Withdrawal of consent

900 - Occurrence of an exclusion criterion, which is clinically relevant and affects the subject's  
901 safety, if discontinuation is considered necessary by the Investigator and/or Sponsor

902 - Therapeutic failure requiring urgent additional drug (if applicable)

903 - Occurrence of any Grade  $\geq 3$  ADRs or repetitive Grade 2 ADRs as defined in Section 5.4

904 - Occurrence of AEs, resulting in the discontinuation of the trial drug being desired or  
905 considered necessary by the Investigator and / or the subject

906 - Occurrence of pregnancy

907 - Use of a nonpermitted concomitant drug, as defined in Section 6.4 if considered  
908 necessary by the Investigator or Sponsor

909 - Noncompliance

910

#### 911 **5.6.2 Withdrawal from the Trial**

912 Subjects are free to discontinue the trial at any time without giving their reasons.

913

914 A subject must be withdrawn in the event of any of the following:

915 - Withdrawal of the subject's consent

916 - Participation in any other therapeutic trial during the treatment duration of this trial;  
917 however, subjects will continue to be followed for survival

918

919 If a subject fails to attend scheduled trial assessments, the Investigator must determine the  
920 reasons and the circumstances as completely and accurately as possible.

## Studio CAVE (Cetuximab-AVElumab) mCRC

921 In case of withdrawal from the trial, the assessments scheduled for the last visit (End-of-  
922 Treatment visit) should be performed (see Section 7.3), if possible, with focus on the most  
923 relevant assessments. In any case, the appropriate End-of-Treatment electronic case report form  
924 (eCRF) visit must be completed. In case of withdrawal, subjects will be asked to continue safety  
925 and survival follow-up, which includes the collection of data on survival, subject-reported  
926 outcomes and subsequent anticancer therapy.

927 If a subject is withdrawn prior to progression for any reason, the subject will not be replaced.  
928

### 929 **5.7 Premature Discontinuation of the Trial**

930 The whole trial may be discontinued prematurely in the event of any of the following:

- 931 - New information leading to unfavorable risk-benefit judgment of the trial drug, for  
932 example, due to
- 933 - evidence of inefficacy of the trial drug,
- 934 - occurrence of significant previously unknown adverse reactions or unexpectedly high  
935 intensity or incidence of known adverse reactions, or
- 936 - other unfavorable safety findings.

937 (Note: Evidence of inefficacy may arise from this trial or from other trials; unfavorable safety  
938 findings may arise from clinical or non-clinical examinations, for example, toxicology.)

- 939 - Sponsor's decision that continuation of the trial is unjustifiable for medical or ethical  
940 reasons
- 941 - Poor enrollment of subjects making completion of the trial within an acceptable time  
942 frame

943 Unlikely

- 944 - Discontinuation of development of the Sponsor's trial drug

945 Health Authorities and Independent Ethics Committees (IECs)/Institutional Review Boards (IRBs)  
946 will be informed about the discontinuation of the trial in accordance with applicable regulations.

947 The whole trial may be terminated or suspended upon request of Health Authorities.  
948

### 949 **5.8 Definition of End of Trial**

950 If the trial is not terminated for a reason given in Section 5.8, the survival follow-up will continue  
951 until 2 years after the last subject receives the last dose of avelumab plus cetuximab.  
952

## 953 **6 Investigational Medicinal Product and Other Drugs Used in the Trial**

954 In this trial, the investigational drugs are avelumab and cetuximab.  
955

### 956 **6.1 Description of Investigational Medicinal Product**

#### 957 **6.1.1 Avelumab**

958 Avelumab is a sterile, clear, and colorless solution intended for IV administration. It is presented at  
959 a concentration of 20 mg/mL in single-use glass vials closed with a rubber stopper and sealed with  
960 an aluminum polypropylene flip-off seal.  
961

#### 962 **6.1.2 Cetuximab**

963 Cetuximab (Erbix<sup>®</sup>): concentrate for solution is provided in vials of 5 mg/ml (European  
964 registered number EU/1/04/281/005, further information on: <http://www.emea.europa.eu/>)  
965

966  
967  
968

969 **6.2 Dosage and Administration**

970

971 **6.2.1 Avelumab Dosage and Administration**

972 Subjects will receive an IV infusion of avelumab at a dose of 10 mg/kg (over the duration of 1  
973 hour) following pretreatment with H1 blockers and acetaminophen 30 to 60 minutes prior to each  
974 avelumab infusion, once every 2 weeks (refer to Appendix I). Premedication with an antihistamine  
975 and with paracetamol (acetaminophen) approximately 30 to 60 minutes prior to each dose of  
976 avelumab is mandatory (for example, 25 50 mg diphenhydramine and 500-650 mg paracetamol  
977 [acetaminophen] IV or oral equivalent). Modifications of the infusion rate due to infusion-related  
978 reactions are described in Section 5.4. The dose of avelumab will be calculated based on the  
979 weight of the subject determined on the day prior to or the day of each drug administration.  
980 Complete blood count and core chemistry samples must be drawn and results reviewed within 48  
981 hours prior to dose administration. Subjects will receive avelumab once every 2 weeks until the  
982 criteria in Sections 5.7 through 5.9 are met.

983

984 Treatment may continue past the initial determination of disease progression per RECIST 1.1 as  
985 long the following criteria are met:

- 986 - Investigator-assessed clinical benefit, without any rapid disease progression
- 987 - Tolerance of trial drug
- 988 - Stable ECOG PS
- 989 - Treatment beyond progression will not delay an imminent intervention to prevent serious  
990 complications of disease progression (for example, central nervous system metastases).

991

992 The decision to continue treatment should be discussed with the Medical Monitor and  
993 documented in the trial records.

994 A radiographic assessment should be performed within 6 weeks of original PD to determine  
995 whether there has been a decrease in the tumor size, or continued PD. The assessment of clinical  
996 benefit should be balanced by clinical judgment as to whether the subject is clinically deteriorating  
997 and unlikely to receive any benefit from continued treatment with avelumab plus cetuximab.

998 If the Investigator feels that the subject continues to achieve clinical benefit by continuing  
999 treatment, the subject should remain on the trial and continue to receive monitoring according to  
1000 the Schedule of Assessments (Appendix I).

1001 For subjects who continue avelumab plus cetuximab trial therapy beyond progression, further  
1002 progression is defined as an additional 10% increase in tumor burden volume from time of initial  
1003 PD. This includes an increase in the sum of all target lesions and/or the development of new  
1004 measurable lesions. Treatment should be discontinued permanently upon documentation of  
1005 further disease progression.

1006 New lesions are considered measureable at the time of initial progression if the longest diameter  
1007 is at least 10 mm (except for pathological lymph nodes, which must have a short axis of at least 15  
1008 mm). Any new lesion considered nonmeasureable at the time of initial progression may become  
1009 measureable and therefore included in the tumor burden volume if the longest diameter increases  
1010 to at least 10 mm (except for pathological lymph nodes, which must have a short axis of at least 15  
1011 mm).

1012 Additionally, subjects receiving avelumab who have experienced a CR should be treated for a  
1013 maximum of 24 months after confirmation, at the discretion of the Investigator. If the Investigator  
1014 believes that a subject may benefit from treatment beyond 24 months, it may be permissible after  
1015 discussion with the Sponsor. In case a subject with a confirmed CR relapses after stopping  
1016 treatment, but prior to the end of the trial, 1 re-initiation of treatment is allowed at the discretion

## Studio CAVE (Cetuximab-AVElumab) mCRC

1017 of the Investigator. In order to be eligible for re-treatment, the subject must not have experienced  
1018 any toxicity that led to treatment discontinuation of the initial avelumab therapy. Subjects who re-  
1019 initiate treatment will stay on trial and will be treated and monitored according to the protocol  
1020 and the “until progression” schedule in the Schedule of Assessments (see Appendix I).

1021

### 1022 **6.2.2 Cetuximab Dosage and Administration**

1023 Cetuximab will be administered at 1<sup>st</sup> dose at 400 mg/m<sup>2</sup> by i.v.infusion over 120 minutes, directly  
1024 after avelumab.

1025 The 2<sup>nd</sup> dose and subsequent doses will be performed at 250 mg/ m<sup>2</sup> by i.v.infusion over 60 minutes,  
1026 every week and after by avelumab every two weeks.

1027 NB: Dilution is not required, but is possible in NaCl 0.9% only, via infusion pump or gravity drip.

1028

### 1029 **6.3 Other Drugs to be Used in the Trial**

1030 Subjects will receive pretreatment with H1 blockers and acetaminophen 30 to 60 minutes prior to  
1031 each avelumab and cetuximab infusion. Premedication with an antihistamine and with  
1032 paracetamol (acetaminophen) approximately 30 to 60 minutes prior to each dose of avelumab and  
1033 cetuximab is mandatory (for example, 25 50 mg diphenhydramine and 500-650 mg paracetamol  
1034 [acetaminophen] IV or oral equivalent). This regimen may be modified based on local treatment  
1035 standards and guidelines as appropriate.

1036 Immediate access to an Intensive Care Unit (ICU) or equivalent environment and appropriate  
1037 medical therapy (including epinephrine, corticosteroids, IV antihistamines, bronchodilators, and  
1038 oxygen) must be available for use in the treatment of infusion-related reactions.

1039 Infusion of avelumab or cetuximab will be stopped in case of Grade  $\geq$  2 infusion-related, allergic,  
1040 or anaphylactoid reactions. Following drug infusions, subjects must be observed for 2 hours post  
1041 infusion for potential infusion-related reactions.

1042 As with all monoclonal antibody therapies, there is a risk of allergic reaction. Avelumab and  
1043 cetuximab should be administered in a setting that allows for immediate access and  
1044 administration of therapy for severe allergic/hypersensitivity reactions, such as the ability to  
1045 implement immediate resuscitation measures. Steroids (dexamethasone 10 mg), epinephrine  
1046 (1:1000 dilution), allergy medications (antihistamines), or equivalents should be available for  
1047 immediate access.

1048 If hypersensitivity reaction occurs, the subject must be treated according to the best available  
1049 medical practice. Guidelines for management of infusion-related reactions and severe  
1050 hypersensitivity and flu-like symptoms according to the NCI are found in Sections 5.4.

1051 A complete guideline for the emergency treatment of anaphylactic reactions according to the  
1052 Working Group of the Resuscitation Council (United Kingdom) can be found at  
1053 <https://www.resus.org.uk/pages/reaction.pdf>. Subjects should be instructed to report any delayed  
1054 reactions to the Investigator immediately.

1055

### 1056 **6.4 Concomitant Medications and Therapies**

1057

#### 1058 **6.4.1 Permitted Medicines**

1059 Any medications (other than those excluded by the clinical trial protocol) that are considered  
1060 necessary for the subjects' welfare and will not interfere with the trial drug may be given at the  
1061 Investigator's discretion.

1062 Other drugs to be used for prophylaxis, treatment of hypersensitivity reactions, and treatment of  
1063 fever or flu-like symptoms are described in Section 5.4.

## Studio CAVE (Cetuximab-AVElumab) mCRC

1064 The Investigator will record all concomitant medications taken by the subject during the trial, from  
1065 the date of signature of informed consent, in the appropriate section of the eCRF.

1066 Any additional concomitant therapy that becomes necessary during the trial and any change to  
1067 concomitant drugs must be recorded in the corresponding section of the eCRF, noting the name,  
1068 dose, duration, and indication of each drug.

1069 Palliative bone-directed radiotherapy may be administered during the trial. The assessment of PD  
1070 will be made according to RECIST 1.1 (40) and not based on the necessity for palliative bone  
1071 directed-radiotherapy.

1072

### 1073 **6.4.2 Nonpermitted Medicines**

1074 As stated for the exclusion criteria in Section 5.6.1, subjects must not have had concurrent  
1075 anticancer treatment (for example, cytoreductive therapy, radiotherapy [with the exception of  
1076 palliative bone-directed radiotherapy, or radiotherapy administered on superficial lesions], major  
1077 surgery (excluding prior diagnostic biopsy), concurrent systemic therapy with steroids or other  
1078 immunosuppressive agents, or use of any investigational drug within 28 days before starting  
1079 treatment.

1080 In addition, the following treatments must not be administered during the trial:

1081

1082 • Immunotherapy, immunosuppressive drugs (that is, chemotherapy or systemic  
1083 corticosteroids except for short-term treatment of allergic reactions or for the treatment of  
1084 irAEs), or other experimental pharmaceutical products.

1085

1086 • Short-term administration of systemic steroid (that is, for allergic reactions or the  
1087 management of irAEs is allowed)

1088

1089 • Growth factors (granulocyte colony stimulating factor or granulocyte macrophage colony  
1090 stimulating factor). Exception: Erythropoietin and darbepoietin alpha may be prescribed at  
1091 the Investigator's discretion

1092

1093 • Bisphosphonate or denosumab treatment is not allowed unless it has been initiated more  
1094 than 14 days prior to receiving the first administration of study drugs

1095

1096 • Vaccination within 4 weeks of the first dose of study drugs and while on trial is prohibited  
1097 except for administration of inactivated vaccines (for example, inactivated influenza  
1098 vaccines)

1097

1098 If the administration of a nonpermitted concomitant drug becomes necessary during the trial, the  
1099 subject will be withdrawn from trial treatment.

1099 Medications other than those specifically excluded in this trial (see above) may be administered  
1100 for the management of symptoms associated with the administration of avelumab or cetuximab  
1101 as required. These might include analgesics, anti-nausea medications, antihistamines, diuretics,  
1102 anti-anxiety medications, and medication for pain management, including narcotic agents. Any  
1103 additional concomitant therapy that becomes necessary during the trial and any change to  
1104 concomitant drugs must be recorded in the corresponding section of the eCRF, noting the name,  
1105 dose, duration, and indication of each drug.

1106

### 1107 **6.4.3 Other Considerations**

1108 The following nondrug therapies must not be administered during the trial (or within 28 days  
1109 before starting treatment):

1110

- Major surgery (excluding prior diagnostic biopsy)

## Studio CAVE (Cetuximab-AVElumab) mCRC

- 1111 - Herbal remedies with immunostimulating properties (for example, mistletoe extract) or  
1112 known to potentially interfere with major organ function (for example, hypericin)  
1113 - Subjects should not abuse alcohol or other drugs during the trial  
1114

### 1115 **6.5 Investigational Medicinal Products Formulation, Packaging and Storage**

#### 1116 **6.5.1 Avelumab**

1118 Avelumab is formulated as a 20.0 mg/mL solution and is supplied by Merck Serono KGaA in single-  
1119 use glass vials, stoppered with a rubber septum and sealed with an aluminum polypropylene flip-  
1120 off seal.

1121 Packaging and labeling will be in accordance with applicable local regulatory requirements and  
1122 applicable GMP guidelines. Avelumab will be packed in boxes each containing 1 vial. The  
1123 information on the trial drug will be in accordance with approved submission documents.

1124 Avelumab will be shipped in transport cool containers (2°C to 8°C) that are monitored with  
1125 temperature control devices.

1126  
1127 The contents of the avelumab vials are sterile and nonpyrogenic, and do not contain bacteriostatic  
1128 preservatives. Any spills that occur should be cleaned up using the facility's standard cleanup  
1129 procedures for biologic products.

1130  
1131 Avelumab drug product must be stored at 2°C to 8°C until use, with a temperature log maintained  
1132 daily. All medication boxes supplied to each trial site must be stored carefully, safely, and  
1133 separately from other drugs.

1134 Avelumab drug product stored at room temperature (23°C to 27°C) or at elevated temperatures  
1135 (38°C to 42°C) for extended periods is subject to degradation. Avelumab must not be frozen.  
1136 Rough shaking of avelumab must be avoided.

1137  
1138 For application in this trial, avelumab drug product must be diluted with 0.9% saline solution  
1139 (sodium chloride injection). Avelumab must not be used for any purpose other than the trial.

1140 The administration of trial drug to subjects who have not been enrolled into the trial is not  
1141 covered by the trial insurance. Any unused portion of the solution should be discarded in  
1142 biohazard waste disposal with final disposal by accepted local and national standards of  
1143 incineration.

#### 1144 **6.5.2 Cetuximab**

1146 Cetuximab will be supplied for the study by Merck Serono KGaA. Cetuximab will be packed in boxes  
1147 (with the required details concerning vial number, batch number, retest date, study number) and  
1148 will be sent to study sites.

1149 All treatment boxes supplied to the study centers must be stored carefully, safely, and separately  
1150 from other drugs. Cetuximab must be stored under refrigeration at +2°C to +8°C. Do not freeze  
1151 Cetuximab. Rough shaking of Cetuximab must be avoided.

1152 For application in this trial, cetuximab drug product not require dilution but it is possible only with  
1153 0.9% saline solution (sodium chloride injection) via infusion pump or gravity drip. Cetuximab must  
1154 not be used for any purpose other than the trial.

1155 The administration of trial drug to subjects who have not been enrolled into the trial is not  
1156 covered by the trial insurance. Any unused portion of the solution should be discarded in

## Studio CAVE (Cetuximab-AVElumab) mCRC

1157 biohazard waste disposal with final disposal by accepted local and national standards of  
1158 incineration.

1159

### 1160 **6.6 Investigational Medicinal Product Accountability**

1161 The Investigator is responsible for ensuring accountability for trial drug (avelumab or cetuximab),  
1162 including reconciliation of drugs and maintenance of drug records.

1163 Upon receipt of trial drug, the Investigator (or designee) will check for accurate delivery and  
1164 acknowledge receipt by signing (or initialing) and dating the documentation provided by the  
1165 Sponsor and returning it to the Sponsor. A copy will be retained for the Investigator File.

1166 The dispensing of the trial drug will be carefully recorded on the appropriate drug accountability  
1167 forms provided by the Sponsor and an accurate accounting will be available for verification by the  
1168 Sponsor's Monitor at each monitoring visit.

1169 Trial drug accountability records will include:

- 1170 - confirmation of trial drug delivery to the trial site;
- 1171 - the inventory at the site of trial drug provided by the Sponsor and prepared at the site;
- 1172 - the use of each dose by each subject;
- 1173 - the return to the Sponsor or alternative disposition of unused trial drug; and
- 1174 - dates, quantities, batch numbers, expiry dates and (for trial drug prepared at the site)  
1175 formulation, as well as the subjects' trial numbers.

1176 The Investigator should maintain records that adequately document

- 1177 - that the subjects were provided the doses specified by the clinical trial protocol /  
1178 amendment(s);and
- 1179 - that all trial drug provided by the Sponsor was fully reconciled.

1180 Unused trial drug must not be discarded or used for any purpose other than the present trial. Any  
1181 trial drug that has been dispensed to a subject must not be redispensed to a different subject.

1182 The Sponsor's Monitor will periodically collect the trial drug accountability forms and will check all  
1183 returns (both unused and used containers) before arranging for their return to the Sponsor or  
1184 authorizing their destruction by the trial site.

1185 At the conclusion or termination of this trial, trial site personnel and the Clinical Trial Monitor will  
1186 conduct a final product supply inventory on the Investigational Drug Accountability Forms and all  
1187 unused containers will be destroyed. Instructions for destruction of product will be provided to  
1188 the site. The Clinical Trial Monitor will be supplied with a copy for filing of the Investigational Drug  
1189 Accountability Forms.

1190

1191 This documentation must contain a record of clinical supplies used, unused, and destroyed and  
1192 shall include information on:

- 1193 - all administered units,
- 1194 - all unused units,
- 1195 - all destroyed units (during the trial),
- 1196 - all destroyed units at the end of the trial,
- 1197 - date of destruction(s),
- 1198 - name and signature of the Investigator/pharmacist.

1199 It must be ensured at each trial site that the trial drug is not used

- 1200 - after the expiry date, and
- 1201 - after the retest date unless the trial drug is reanalyzed and its retest date extended.

## Studio CAVE (Cetuximab-AVElumab) mCRC

1202 This is to be closely monitored by the Clinical Trial Monitor.

1203

### 12046.7 Assessment of Investigational Medicinal Product Compliance

1205 In this trial, subjects will receive trial treatment at the investigational site. Well-trained medical  
1206 staff will monitor and perform the trial drug administration. The information of each trial drug  
1207 administration including the date, time, and dose of trial drug will be recorded on the eCRF. The  
1208 Investigator will make sure that the information entered into the eCRF regarding drug  
1209 administration is accurate for each subject. Any reason for noncompliance should be documented.  
1210 Noncompliance is defined as a subject missing > 1 infusion of trial treatment for nonmedical  
1211 reasons. If 1 infusion is missed and the interval between the subsequent infusion and the last  
1212 administered treatment is longer than 4 weeks for nonmedical reasons, the criteria of insufficient  
1213 compliance are met as well.

1214

### 12156.8 Treatment of Overdose

1216 An overdose is defined as any dose  $\geq$  5% than the calculated dose for that particular  
1217 administration as described in this clinical trial protocol. Any overdose must be recorded in the  
1218 trial drug section of the eCRF. For monitoring purposes, any case of overdose, whether or not  
1219 associated with an AE (serious or nonserious), must be reported to the Sponsor's Global Drug  
1220 Safety department in an expedited manner using the appropriate reporting form (see below).  
1221 There are no known symptoms of avelumab or cetuximab overdose to date. The Investigator  
1222 should use his or her clinical judgment when treating an overdose of the trial drug.

1223

1224

1225

### 12266.9 Medical Care of Subjects After End of Treatment

1227 After a subject has stopped trial treatment, usual treatment will be administered, if required, in  
1228 accordance with the trial site's standard of care and generally accepted medical practice and  
1229 depending on the subject's individual medical needs. Upon withdrawal from trial treatment,  
1230 subjects may receive whatever care they and their physicians agree upon. Subjects will be  
1231 followed for survival and AEs.

1232

1233

1234

1235

1236

## 1237 7 Trial Procedures and Assessments

1238

### 1239 7.1 Screening and Baseline Procedures and Assessments

1240 During the Screening period and before any trial-related investigations and assessments are  
1241 started, subjects will be asked to sign the ICF. The Screening procedures and Baseline assessments  
1242 will be completed within 28 days of signing the ICF before start of treatment. Failure to establish  
1243 eligibility within 28 days would result in screening failure and the subject will be excluded from the  
1244 trial; however, subjects can be re-entered in the trial based on the Investigator's judgment within  
1245 6 weeks of signing the ICF. In this case, a new ICF will be required to be signed by the subject.

1246



## Studio CAVE (Cetuximab-AVElumab) mCRC

1247 The subjects' information that will be documented during Screening includes the demographic  
1248 information (birth date, sex, and race) and the complete medical history, including the history of  
1249 mCRC previous and ongoing (concomitant) medications, and Baseline medical condition (the  
1250 information of concomitant medications and AEs will be monitored throughout the trial treatment  
1251 period). During Screening, subjects will undergo a physical examination, including recording body  
1252 height and weight, vital signs, 12-lead ECG, and a determination of the ECOG PS.

1253  
1254 The Screening laboratory examination includes hematology, hemostaseology, full serum chemistry  
1255 (including core chemistry), and full urinalysis (dipstick plus microscopic evaluation).  
1256 Adrenocorticotrophic hormone (ACTH), ANA, ANCA, rheumatoid factor (RF), free thyroxine (T4), and  
1257 thyroid-stimulating hormone (TSH) will also be assessed at Screening for all subjects. Additionally,  
1258 HBV surface antigen and anti-HCV tests must be performed at screening to exclude hepatitis  
1259 infection. If the anti-HCV antibody test is positive, infection should be confirmed by an HCV RNA  
1260 test.

1261  
1262 During Screening, a serum  $\beta$ -human chorionic gonadotropin ( $\beta$ -HCG) pregnancy test will be  
1263 performed for females of childbearing potential and blood hepatitis B virus and hepatitis C virus  
1264 will be performed (local laboratory) for all Screening subjects as these conditions are trial entry  
1265 exclusion criteria.

1266  
1267 Females who are postmenopausal (age-related amenorrhea  $\geq$  12 consecutive months and  
1268 increased follicle-stimulating hormone [FSH]  $>40$  mIU/mL), or who have undergone hysterectomy  
1269 or bilateral oophorectomy are exempt from pregnancy testing. If necessary to confirm  
1270 postmenopausal status, FSH will be drawn at Screening.

1271  
1272 The tumor evaluation (type and staging, etc) will be performed using CT scan or MRI (if MRI is  
1273 used, CT of chest is mandatory) or any other established methods. A brain CT/MRI scan is  
1274 required at Screening if not performed within 6 weeks prior to start treatment. A bone scan should  
1275 be done at Screening as clinically indicated. The blood samples for soluble factors, and  
1276 immunogenicity will be collected before or on Day 1 before trial treatment.

1277

1278

1279

### 7.2 Treatment Period

1280 In this trial, the treatment will be given until PD, significant clinical deterioration (clinical  
1281 progression), unacceptable toxicity, or any criterion for withdrawal from the trial or trial drug is  
1282 fulfilled.

1283 Treatment may continue past the initial determination of disease progression per RECIST 1.1 as  
1284 long the following criteria are met:

- 1285 - Investigator-assessed clinical benefit, without any rapid disease progression
- 1286 - Tolerance of trial drug
- 1287 - Stable ECOG PS
- 1288 - Treatment beyond progression will not delay an imminent intervention to prevent serious  
1289 complications of disease progression (for example, central nervous system metastases).

1290 The decision to continue treatment should be discussed with the Sponsor and documented in the  
1291 trial records.

1292 A radiographic assessment should be performed within 6 weeks of original PD to determine  
1293 whether there has been a decrease in the tumor size, or continued PD. The assessment of clinical

## Studio CAVE (Cetuximab-AVElumab) mCRC

1294 benefit should be balanced by clinical judgment as to whether the subject is clinically deteriorating  
1295 and unlikely to receive any benefit from continued treatment.

1296 If the Investigator feels that the subject continues to achieve clinical benefit by continuing  
1297 treatment, the subject should remain on the trial and continue to receive monitoring according to  
1298 the Schedule of Assessments.

1299 For subjects who continue trial therapy beyond progression, further progression is defined as an  
1300 additional 10% increase in tumor burden volume from time of initial PD. This includes an increase  
1301 in the sum of all target lesions and/or the development of new measurable lesions. Treatment  
1302 should be discontinued permanently upon documentation of further disease progression.

1303 New lesions are considered measurable at the time of initial progression if the longest diameter  
1304 is at least 10 mm (except for pathological lymph nodes, which must have a short axis of at least  
1305 15mm). Any new lesion considered nonmeasurable at the time of initial progression may become  
1306 measurable and therefore included in the tumor burden volume if the longest diameter increases  
1307 to at least 10 mm (except for pathological lymph nodes, which must have a short axis of at least 15  
1308 mm).

1309 Additionally, subjects who have experienced a CR should be treated for a maximum of 24months  
1310 after confirmation, at the discretion of the Investigator. If the Investigator believes that a subject  
1311 may benefit from treatment beyond 24months, it may be permissible after discussion with the  
1312 Sponsor. In case a subject with a confirmed CR relapses after stopping treatment, but prior to the  
1313 end of the trial, re-initiation of treatment is allowed at the discretion of the Investigator. In order  
1314 to be eligible for re-treatment, the subject must not have experienced any toxicity that led to  
1315 treatment discontinuation of the initial therapy. Subjects who re-initiate treatment will stay on  
1316 trial and will be treated and monitored according to the protocol and the "until progression"  
1317 schedule in the Schedule of Assessments.

1318 While on trial treatment, subjects will be asked to visit the trial site at each cycle. A time window  
1319 of up to 1 days before or 1 day after the scheduled visit day (-1/+1 days) will be permitted for all  
1320 trial procedures. In addition, the tumor evaluation has a tumor assessment visiting time window of  
1321 5 days prior to the scheduled day(-5 days).

1322

1323

1324 Subjects will receive:

1325 - avelumab by IV infusion following pretreatment with H1 blockers (diphenhydramine 25to  
1326 50mg IV, or equivalent), and acetaminophen 500 to 650 mg (oral or IV), once every  
1327 2weeks,

1328

1329 AND

1330 - cetuximab by IV infusion at a dose of 400 mg/m<sup>2</sup> on day 1, then 250 mg/m<sup>2</sup> weekly.

1331 During the treatment period, the following assessments will be performed:

1332 - AEs and concomitant medications will be documented at each trial visit.  
1333 - ECOG PS will be assessed at Day 1 (unless the Screening ECOG PS was performed within  
1334 3days prior to Day 1) and at each trial visit thereafter.  
1335 - Physical examinations will be performed at each visit.  
1336 - Vital signs and body weight will be assessed in each visit.

1337

1338 - The laboratory hematology, hemostaseology, full serum chemistry tests and basic  
1339 urinalysis will be assessed every two weeks before avelumab and cetuximab  
1340 administration. If the basic urinalysis is abnormal, a full urinalysis should be performed.

## Studio CAVE (Cetuximab-AVElumab) mCRC

- 1341  
1342 - A urine or serum  $\beta$ -HCG pregnancy test will be performed before each administration of  
1343 the trial drug for females of childbearing potential. Results of the most recent pregnancy  
1344 test should be available prior to the next dosing of trial drugs.  
1345  
1346 - Tumor evaluation for all subjects will be performed every 8 weeks for 40 weeks after  
1347 starting treatment, and every 12 weeks thereafter regardless of any dose delays or  
1348 treatment, with a tumor assessment visiting time window of 5 days prior to the scheduled  
1349 tumor assessment day (-5 days).  
1350  
1351 - ACTH, ANA, ANCA, RF will be measured at Week 13, Week 25, and if clinically indicated for  
1352 all subjects.  
1353  
1354 - FT4 and TSH will be measured at baseline and at least every 8 weeks during treatment  
1355  
1356  
1357

### 7.3 End of Treatment

#### 1359 Discontinuation visit

1360 Any subject who experiences an AE that mandates discontinuation of trial treatment should have  
1361 a Discontinuation visit as soon as possible after the decision to discontinue trial treatment (at least  
1362 within 7 days).

1363 For all these subjects, the Discontinuation visit will include the following:

- 1364 - Subject-reported outcomes will be completed  
1365 - Documentation of AEs and concomitant medication  
1366 - Physical examination, including vital signs and body weight  
1367 - 12-lead ECGs  
1368 - Laboratory hematology, hemostaseology, full serum chemistry, and basic urinalysis  
1369 - ECOG PS

1370 Once the Discontinuation visit has been performed, subjects must return for the End-of-Treatment  
1371 visit within 28 days ( $\pm$  5 days) after discontinuation.  
1372

#### 1373 End-of-Treatment visit

1374 The End-of-Treatment visit is scheduled 4 weeks (28 days  $\pm$  5 days) after the last administration of  
1375 trial treatment, but before any new therapy is started, if possible, whichever occurs earlier. The  
1376 End-of-Treatment visit will comprise a full assessment for safety, immunogenicity, and tumor  
1377 response as appropriate, and will include the following:

- 1378 - Subject-reported outcomes  
1379 - AEs, concomitant medications, and ECOG PS  
1380 - Physical examination including vital signs and body weight  
1381 - 12-lead ECGs  
1382 - Laboratory hematology, hemostaseology, full serum chemistry, and full urinalysis (dipstick  
1383 plus microscopic evaluation)  
1384 - Urine or serum  $\beta$ -HCG pregnancy test (in females of childbearing potential)  
1385 - Tumor evaluation (only to be performed if no disease progression was documented  
1386 previously)  
1387 - ACTH, ANA, ANCA, RF, T4, and TSH levels

## Studio CAVE (Cetuximab-AVElumab) mCRC

- 1388 - Blood sample for determination of soluble factors  
1389 - Blood samples for gene expression profiling

1390

### 1391 **7.4 Safety Follow-up**

1392 Given the potential risk for delayed immune-related toxicities, safety follow-up must be  
1393 performed up to 90 days after the last dose of avelumab administration. All subjects will have a  
1394 subsequent visit scheduled 30 days after the last administration of trial treatment. The visit will  
1395 include the following full assessment of safety parameters:

- 1396 - After the End-of-Treatment visit only treatment related AEs have to be documented until  
1397 the Safety Follow-up visit  
1398 - Concomitant medications will be documented, including further anticancer therapy  
1399 - Vital signs and body weight will be measured  
1400 - Physical examination will be performed  
1401 - ECOG PS will be assessed

1402 Laboratory testing consisting of the following will be assessed:

- 1403 - Hematology, hemostaseology, coeserum chemistry, and basic urinalysis  
1404 - ACTH, ANA, ANCA, RF, T4, and TSH levels  
1405 - A urine or serum  $\beta$ -HCG pregnancy test (in females of childbearing potential) will be  
1406 conducted

1407 The extended safety follow-up beyond 30 days after last avelumab administration may be  
1408 performed either via a site visit or via a telephone call with subsequent site visit requested in case  
1409 any concerns noted during the telephone call.

1410

### 1411 **7.5 Long-term Follow-up**

1412 All SAEs ongoing at the Safety follow-up visit must be monitored and followed up by the  
1413 Investigator until stabilization or until the outcome is known, unless the subject is documented as  
1414 "lost to follow-up." Any SAE assessed as related to the IMP must be reported whenever it occurs,  
1415 irrespective of the time elapsed since the last administration of the IMP.

1416 Subjects without PD according to RECIST 1.1 at the End-of-Treatment visit will be followed up for  
1417 disease progression (CT/MRI scans every 8 weeks[ $\pm$  5 days] using the same procedures and review  
1418 as while on treatment) until disease progression, lost to follow-up, or withdrawal of informed  
1419 consent.

1420 After the End-of-Treatment visit, subjects will be followed quarterly (that is, every 3 months  
1421  $\pm$ 1week) for survival (including assessment of any further tumor therapy). The survival follow-up  
1422 will continue until 2 years after the last subject receives the last dose of study drugs.

1423

### 1424 **7.6 Demographic and Other Baseline Characteristics**

1425 The assessments and procedures described in this section must be performed during the  
1426 Screening period.

1427

#### 1428 **7.6.1 Demographic Data**

1429 The following demographic data will be recorded:

- 1430 - Subject identifier

## Studio CAVE (Cetuximab-AVElumab) mCRC

- 1431 - Date of birth
- 1432 - Sex
- 1433 - Race
- 1434 - Ethnicity

1435  
1436

### 7.6.2 Diagnosis of mCRC

1437 The tumor disease information that will be documented and verified at the Screening visit for each  
1438 subject includes:

- 1439 - detailed history of the tumor, including histological/citological diagnosis, grading, and  
1440 staging in accordance with the International Union Against Cancer Tumor Node Metastasis  
1441 Classification of Malignant Tumors at diagnosis;
- 1442 - all therapy used for prior treatment of the tumor (including surgery, radiotherapy and  
1443 chemotherapy, immunotherapy);
- 1444 - any other conditions that were treated with chemotherapy, radiation therapy, or  
1445 immunotherapy;
- 1446 - current cancer signs and symptoms and side effects from current and previous anticancer  
1447 treatments; and
- 1448 - current cancer disease status.

1449  
1450

### 7.6.3 Medical History

1451 In order to determine the subject's eligibility to the trial, a complete medical history of each  
1452 subject will be collected and documented during Screening, which will include, but may not be  
1453 limited to, the following:

- 1454 - Past and concomitant nonmalignant diseases and treatments
- 1455 - All medications (including herbal medications) taken and procedures carried out within  
1456 28 days prior to Screening

1457 For the trial entry, all of the subjects must fulfill all inclusion criteria described in Section 5.5, and  
1458 none of the subjects should have any exclusion criteria from the list described in 5.5.

1459  
1460

### 7.6.4 Vital Signs and Physical Examination

1461 Vital signs including body temperature, respiratory rate, heart rate (after 5-minute rest), and  
1462 arterial blood pressure (after 5-minute rest) will be recorded at trial entry. A physical examination  
1463 (including, in general, appearance, dermatological, head/neck, pulmonary, cardiovascular,  
1464 gastrointestinal, genitourinary, lymphatic, musculoskeletal system, extremities, eyes [inspection  
1465 and vision control], nose, throat, and neurologic status) will be performed and the results  
1466 documented. The ECOG PS will be documented during the Screening phase and at each scheduled  
1467 visit. Body weight and height (Screening only) will be recorded.

1468  
1469

### 7.6.5 CT or MRI Scans for Tumor Assessment at Baseline

1470 Baseline imaging will be performed within 28 days prior the start of treatment in order to establish  
1471 Baseline disease status of target and nontarget lesions according to RECIST 1.1. Acceptable  
1472 modalities include CT scans (chest, abdomen, and pelvis), CT chest with contrast (or chest MRI in  
1473 Germany) together with MRI of the abdomen and pelvis or positron emission tomography / CT  
1474 scans. The use of IV contrast is preferred unless there is a history of allergy or other risk in the  
1475 opinion of the Investigator (chest X-ray is not acceptable and other imaging modalities may be

## **Studio CAVE (Cetuximab-AVElumab) mCRC**

1476 performed at the discretion of the Investigator and as clinically indicated). Bone scans should be  
1477 performed if clinically indicated. Baseline tumor burden should be determined as outlined in  
1478 Section 7.7. A brain CT/MRI scan is required at Screening if one has not been performed within 8  
1479 weeks prior to starting treatment. In general, lesions detected at Screening/Baseline need to be  
1480 followed using the same imaging methodology and preferably the same imaging equipment at  
1481 subsequent tumor evaluation visits.

1482

1483

### **7.6.6 Cardiac Assessments**

1484 A 12-lead ECG will be recorded at Screening and at the Early Discontinuation/End-of Treatment  
1485 visit after the subject has been in a supine position breathing quietly for 5 minutes. The ECG  
1486 results will be used to evaluate the heart rate, atrial-ventricular conduction, QR and QT intervals,  
1487 and possible arrhythmias. Left-ventricular function evaluation (echocardiogram or multigated  
1488 acquisition scan) will be also performed

1489

1490

1491

### **7.6.7 Ophthalmologic Assessment**

1492 An ophthalmologic assessment will be also performed prior to study treatment start and clinically  
1493 indicated, including at least visual acuity and slit-lamp tests

1494

1495

### **7.6.8 Clinical Laboratory Tests**

1496 Blood samples will be collected at Screening for clinical laboratory parameter evaluations. These  
1497 clinical laboratory test results will serve not only as the Baseline values for subsequent safety  
1498 clinical laboratory evaluations during the trial, but will also help to make sure that each enrolled  
1499 subject fulfills all the trial entry criteria and does not meet any of the trial exclusion criteria for  
1500 laboratory parameters.

1501

1502

## **7.7 Assessment of Efficacy**

1503 Radiographic images and physical findings (physical assessments) will be used for the local  
1504 determination of tumor response or progression according to RECIST 1.1.

1505 For each subject, tumor response assessment will be performed by CT scan or MRI (if MRI is used,  
1506 CT of chest is mandatory) imaging of the chest/abdomen/pelvis (plus other regions as specifically  
1507 required) and other established assessments of tumor burden if CT/MRI imaging is insufficient for  
1508 the individual subject.

1509 All the scans performed at Baseline and other imaging performed as clinically required (other  
1510 supportive imaging) need to be repeated at subsequent visits (except for brain scans, unless  
1511 clinically indicated). In general, lesions detected at Baseline need to be followed using the same  
1512 imaging methodology and preferably the same imaging equipment at subsequent tumor  
1513 evaluation visits. A brain CT/MRI scan is required at Screening if not performed within 8 weeks  
1514 prior the start of treatment. Brain CT/MRI scans should be performed after Screening, if clinically  
1515 indicated by development of new specific symptoms. A bone scan should be done as clinically  
1516 indicated at Screening and beyond. For each subject, the Investigator will designate 1 or more of  
1517 the following measures of tumor status to follow for determining response: CT or MRI images of  
1518 primary and/or metastatic tumor masses, physical examination findings, and the results of other  
1519 assessments. All available images collected during the trial period will be considered. The most  
1520 appropriate measures to evaluate the tumor status of a subject should be used. The measure(s) to  
1521 be chosen for sequential evaluation during the trial must correspond to the measures used to

## **Studio CAVE (Cetuximab-AVElumab) mCRC**

1522 document the progressive tumor status that qualifies the subject for enrollment. The tumor  
1523 response assessment will be assessed and listed according to the Schedule of Assessments.  
1524 Treatment decisions will be made by the Investigator based on the Investigator's assessment of  
1525 tumor status. For efficacy determination, tumor responses to treatment will be assigned based on  
1526 the evaluation of the response of target, nontarget, and new lesions according to RECIST 1.1 (all  
1527 measurements should be recorded in metric notation, as described in RECIST 1.1).

1528  
1529 To assess objective response, the tumor burden at Baseline will be estimated and used for  
1530 comparison with subsequent measurements. At Baseline, tumor lesions will be categorized in  
1531 target and nontarget lesions as described in RECIST 1.1. Results for these evaluations will be  
1532 recorded with as much specificity as possible so that pre-and post-treatment results will provide  
1533 the best opportunity for evaluating tumor response. Any CR or PR should be confirmed, preferably  
1534 at the scheduled 8-week interval, but no sooner than 5 weeks after the initial documentation of  
1535 CR or PR. Confirmation of PR can be confirmed at an assessment later than the next assessment  
1536 after the initial documentation of PR. The Investigator may perform scans in addition to a  
1537 scheduled trial scan for medical reasons or if the Investigator suspects PD.  
1538 Subjects who withdraw from the trial for clinical or symptomatic deterioration before objective  
1539 documentation of PD will be requested to undergo appropriate imaging to confirm PD. Every  
1540 effort should be made to confirm a clinical diagnosis of PD by imaging.

### **1541 1542 7.8 Assessment of Safety**

1543 The safety profile of the trial treatments will be assessed through the recording, reporting, and  
1544 analyzing of Baseline medical conditions, AEs, physical examination findings, including vital signs,  
1545 and laboratory tests.  
1546 Comprehensive assessment of any apparent toxicity experienced by the subject will be performed  
1547 throughout the course of the trial, from the time of the subject's signature of informed consent.  
1548 Trial site personnel will report any AE, whether observed by the Investigator or reported by the  
1549 subject. Given the intended mechanism of action of avelumab, particular attention will be given to  
1550 AEs that may follow the enhanced T-cell activation, such as dermatitis, colitis, hepatitis, uveitis, or  
1551 other immune-related reactions. Ophthalmologic examinations should be considered, when  
1552 clinically indicated, for signs or symptoms of uveitis.. The safety assessments will be performed  
1553 according to the Schedule of Assessments (refer to Appendix I)

### **1554 1555 7.9 Adverse Events**

#### **1556 1557 7.9.1 Adverse Event Definitions**

1558 An AE is any untoward medical occurrence in a subject or clinical investigation subject  
1559 administered a pharmaceutical product, regardless of a causal relationship with this treatment. An  
1560 AE can therefore be any unfavorable and unintended sign (including an abnormal laboratory  
1561 finding), symptom, or disease temporally associated with the use of a medicinal product, whether  
1562 or not considered related to the medicinal product.  
1563 In cases of surgical or diagnostic procedures, the condition / illness leading to such a procedure is  
1564 considered as the AE rather than the procedure itself.  
1565 The Investigator is required to grade the severity/intensity of each AE.  
1566 Investigators will reference the NCI-CTCAE v 4.0. This is a descriptive terminology that can be used  
1567 for AE reporting. A general grading (severity / intensity; hereafter referred to as severity) scale is  
1568 provided at the beginning of the referenced document, and specific event grades are also

## Studio CAVE (Cetuximab-AVElumab) mCRC

1569 provided. If a particular AE severity is not specifically graded by the guidance document, the  
1570 Investigator is to use the general NCI-CTCAE definitions of Grade 1 through Grade 5 following his  
1571 or her best medical judgment.

1572

1573 The 5 general grades are:

1574

1575 Grade 1: Mild

1576 Grade 2: Moderate

1577 Grade 3: Severe

1578 Grade 4: Life-threatening

1579 Grade 5: Death

1580

1581 According to the Sponsor's convention, any clinical AE with severity of Grade 4 or 5 must also be  
1582 reported as an SAE; however, a laboratory abnormality of Grade 4, such as anemia or neutropenia,  
1583 is considered serious only if the condition meets one of the serious criteria described below.

1584 If death occurs, the primary cause of death (or event leading to death) should be recorded and  
1585 reported as an SAE. "Fatal" will be recorded as the outcome of this respective event; death will  
1586 not be recorded as a separate event. Only if no cause of death can be reported (for  
1587 example, sudden death, unexplained death), the death per se might be reported as an SAE.

1588 Investigators must also systematically assess the causal relationship of AEs to the trial treatment  
1589 using the following definitions. Decisive factors for the assessment of causal relationship of an AE  
1590 to trial treatment include, but may not be limited to, temporal relationship between the AE and  
1591 treatment administration, known side effects of trial treatment, medical history, concomitant  
1592 medication, course of the underlying disease, trial procedures.

1593

1594 **Not related:** Not reasonably related to the trial treatment. The AE could not medically  
1595 (pharmacologically/clinically) be attributed to the trial treatment in this clinical trial protocol. A  
1596 reasonable alternative explanation must be available.

1597

1598 **Related:** Reasonably related to the trial treatment. The AE could medically  
1599 (pharmacologically/clinically) be attributed to the trial treatment.

1600

1601 Abnormal laboratory findings and other abnormal investigational findings (for example, on an ECG  
1602 trace) should not be reported as AEs unless they are associated with clinical signs and symptoms,  
1603 lead to treatment discontinuation, or are considered otherwise medically important by the  
1604 Investigator. If a laboratory abnormality fulfills these criteria, the identified medical condition (for  
1605 example, anemia, increased ALT) must be reported as the AE rather than the abnormal value  
1606 itself.

1607

### 1608 **Adverse Drug Reaction (ADR)**

1609 Adverse drug reactions are defined in this trial as any AEs suspected to be related to trial  
1610 treatment by the Investigator and / or Sponsor.

1611

### 1612 **Serious Adverse Events (SAE)**

1613 A SAE is any untoward medical occurrence that at any dose

1614 - results in death,



## Studio CAVE (Cetuximab-AVElumab) mCRC

- 1615 - is life-threatening (NOTE: The term “life-threatening” refers to an event in which the  
1616 subject is at risk of death at the time of the event; not an event that hypothetically might  
1617 have caused death if it was more severe),  
1618 - requires inpatient hospitalization or prolongation of existing hospitalization,  
1619 - results in persistent or significant disability/incapacity,  
1620 - is a congenital anomaly/birth defect, or  
1621 - is otherwise considered as medically important.

1622 Note: Important medical events that may not result in death, be life-threatening, or require  
1623 hospitalization may be considered as SAEs when, based upon appropriate medical judgment, they  
1624 may jeopardize the subject or may require medical or surgical intervention to prevent one of the  
1625 outcomes listed above. Examples of such events include allergic bronchospasm requiring intensive  
1626 treatment in an emergency room or at home, blood dyscrasias or convulsions that do not result in  
1627 inpatient hospitalization, or the development of drug dependency or drug abuse.

1628  
1629 For the purposes of reporting, any suspected transmission of an infectious agent via a trial drug is  
1630 also considered a SAE, as described in Section 7.9.

### 1631 1632 **Events that do not meet the definition of an SAE**

1633 Elective hospitalizations to administer, or to simplify trial treatment or trial procedures (for  
1634 example, an overnight stay to facilitate chemotherapy and related hydration therapy application)  
1635 are not considered as SAEs; however, all events leading to unplanned hospitalizations or  
1636 unplanned prolongation of an elective hospitalization (for example, undesirable effects of any  
1637 administered treatment) must be documented and reported as SAEs.

### 1638 1639 **Events not to be considered as AEs/SAEs**

1640 Medical conditions present at the initial trial visit that do not worsen in severity or frequency  
1641 during the trial are defined as Baseline Medical Conditions, and are NOT to be considered AEs.

### 1642 1643 **AEs/SAEs observed in association with disease progression**

1644 Disease progression recorded in the course of efficacy assessments only, but without any adverse  
1645 signs and symptoms should not be reported as AEs. However, if adverse signs or symptoms occur  
1646 in association with disease progression then these should be recorded, and reported as SAEs if  
1647 meeting any seriousness criteria.

### 1648 1649 **Predefined AEs of special interest for safety monitoring**

1650 Any AE that is suspicious to be a potential irAE will be considered AEs of special interest (AESI).

## 1651 1652 **7.9.2 Methods of Recording and Assessing Adverse Events**

1653 At each trial visit the subject will be queried on changes in his or her condition. During the  
1654 reporting period of the trial any unfavorable changes in the subject’s condition will be recorded as  
1655 AEs, whether reported by the subject or observed by the Investigator.

1656  
1657 Complete, accurate, and consistent data on all AEs experienced for the duration of the reporting  
1658 period (defined below) will be reported on an ongoing basis in the appropriate section of the  
1659 eCRF.

1660

## Studio CAVE (Cetuximab-AVElumab) mCRC

1661 All SAEs must be additionally documented and reported using the appropriate report forms  
1662 described in Section 7.9.

1663

1664 It is important that each AE report include a description of the event, its duration (onset and  
1665 resolution dates and times to be completed when it is important to assess the time of AE onset  
1666 relative to the recorded treatment administration time), its severity, its causal relationship with  
1667 the trial treatment, any other potential causal factors, any treatment given or other action taken  
1668 (including dose modification or discontinuation of the trial drug), and its outcome. In addition,  
1669 serious cases should be identified and the appropriate seriousness criteria documented.

1670

1671

### 7.9.3 Definition of the Adverse Event Reporting Period

1672 The AE reporting period for safety surveillance begins when the subject is initially included in the  
1673 trial (date of first signature of informed consent) and continues through the trial's End-of-  
1674 Treatment visit, defined as 28 days ( $\pm$  5 days) after last trial drug administration. After the End-of-  
1675 Treatment visit only treatment related AEs have to be documented until the Safety Follow-up visit,  
1676 defined as 12 weeks ( $\pm$  2 weeks) after the last trial treatment administration.

1677 Any SAE suspected to be related to the trial treatment must be reported whenever it occurs,  
1678 irrespective of the time elapsed since the last administration.

1679 Given the potential risk for delayed immune-related toxicities, safety follow-up must be  
1680 performed up to 90 days after the last dose of avelumab administration.

1681 The extended safety follow-up beyond 30 days after last avelumab administration may be  
1682 performed either via a site visit or via a telephone call with subsequent site visit requested in case  
1683 any concerns noted during the telephone call.

1684

1685

### 7.9.4 Procedure for Reporting Serious Adverse Events

1686 The Sponsor-Investigator primary responsibilities for safety reporting are to identify and follow-up  
1687 on Serious Adverse Events (SAEs) experienced by participants in the study and to forward the  
1688 information to the local regulatory authorities and Merck, as required by local regulations (for  
1689 regulatory reporting) and as required by the ISS agreement (for reporting to Merck).

1690

1691 The following reportable events must be submitted to the Sponsor within 24 hours (or immediately  
1692 for death or life-threatening events)\* using the applicable safety report form provided. The  
1693 Sponsor will assume responsibility for submitting the reportable event(s) to Merck within 2  
1694 business days or 3 calendar days (whichever comes first), as well as ensuring that any local  
1695 reporting requirements are completed in parallel.

- 1696 • Serious Adverse Events
- 1697 • Exposure during Pregnancy or Breastfeeding (even if not associated with an adverse event)
- 1698 • Occupational exposure (even if not associated with an adverse event)
- 1699 • Potential drug-induced liver injury (Hy's Law cases): These events are considered  
1700 important medical events and should be reported as SAEs.

1701

1702 Contact information for submission of reportable events to Fortunato Ciardiello\*:

1703

1704 Fax: [## ### ##]\*

1705 OR

1706 E-mail: [xxxxxxxxxxxxxx]\*

1707 Specifying:

## Studio CAVE (Cetuximab-AVElumab) mCRC

- 1708 • PROTOCOL Number and/or Title
- 1709 • Merck assigned Study Number
- 1710 • SUBJECT Number
- 1711 • SITE Number/PI Name
- 1712 • SAE/ONSET DATE

1713

1714 \*Sponsor/Chief Investigator (CI): the lead Institution/Investigator responsible for the ISS who has  
1715 entered into a contractual agreement with Merck – please update red text as applicable  
1716 depending on reporting arrangements for your study.

1717

1718 In the event of any new SAE occurring during the reporting period, the Investigator must  
1719 immediately (that is, within a maximum of 24 hours after becoming aware of the event) inform  
1720 the Sponsor or designee in writing. All written reports should be transmitted using the SAE Report  
1721 Form, which must be completed by the Investigator following specific completion instructions. In  
1722 exceptional circumstances, an SAE (or follow-up information) may be reported by telephone. In  
1723 these cases, a written report must be sent immediately thereafter by fax or e-mail.

1724 Reporting procedures and timelines are the same for any new information on a previously  
1725 reported SAE (= follow-up).

1726

1727 Names, addresses, telephone, and fax numbers for SAE reporting will be included in the trial  
1728 specific SAE report form.

1729 Relevant pages from the eCRF may be provided in parallel (for example, medical history,  
1730 concomitant drugs). Additional documents may be provided by the Investigator, if available (for  
1731 example, laboratory results, hospital report, autopsy report).

1732

1733 In all cases, the information provided on the SAE report form must be consistent with the data  
1734 about the event recorded in the eCRF. The Investigator must respond to any request for follow-up  
1735 information (for example, additional information, outcome final evaluation, other records where  
1736 needed) or to any question the Sponsor or designee may have on the AE within the same timelines  
1737 as those noted above for initial reports. This is necessary to ensure a prompt assessment of the  
1738 event by the Sponsor or designee and (as applicable) to allow the Sponsor to meet strict  
1739 regulatory timelines associated with expedited safety reporting obligations.

1740

1741 Requests for follow-up will usually be made by the responsible Clinical Trial Monitor, although in  
1742 exceptional circumstances, the Global Drug Safety department may contact the Investigator  
1743 directly to obtain further information or to discuss the event

1744

### 1745 **7.9.5 Safety Reporting to Health Authorities, Independent Ethics** 1746 **Committees/Institutional Review Boards and Investigators**

1747 The Sponsor will send appropriate safety notifications to Health Authorities in accordance with  
1748 applicable laws and regulations. The Investigator must comply with any applicable site-specific  
1749 requirements related to the reporting of SAEs (and in particular deaths) involving his or her  
1750 subjects to the IEC / IRB that approved the trial.

1751

1752 In accordance with ICH GCP guidelines, the Sponsor or designee will inform the Investigator of  
1753 “findings that could adversely affect the safety of subjects, impact the conduct of the trial, or alter  
1754 the IEC/ IRB approval / favorable opinion to continue the trial.” In particular and in line with  
1755 respective regulations, the Sponsor will inform the Investigator of AEs that are both serious and

## **Studio CAVE (Cetuximab-AVElumab) mCRC**

1756 unexpected and are considered to be related to the administered product (SUSARs). The  
1757 Investigator should place copies of Safety reports in the Investigator Site File. National regulations  
1758 with regard to Safety report notifications to Investigators will be taken into account.  
1759

1760 When specifically required by regulations and guidelines, the Sponsor or the designee will provide  
1761 appropriate Safety reports directly to the concerned lead IEC / IRB and will maintain records of  
1762 these notifications. When direct reporting by the Sponsor is not clearly defined by national or site-  
1763 specific regulations, the Investigator will be responsible for promptly notifying the concerned IEC /  
1764 IRB of any Safety reports provided by the Sponsor or designee and of filing copies of all related  
1765 correspondence in the Investigator Site File.  
1766

1767 For trials covered by the European Directive 2001/20/EC, the Sponsor's responsibilities regarding  
1768 the reporting of SAEs / SUSARs / Safety Issues will be carried out in accordance with that directive  
1769 and with the related detailed guidance.  
1770

1771

1772

### **7.9.6 Monitoring of Subjects with Adverse Events**

1773 Adverse events are recorded and assessed continuously throughout the trial (see Section 7.9) and  
1774 are assessed for final outcome at the End-of-Treatment visit. After the End-of-Treatment visit, only  
1775 treatment related AEs have to be documented until the Safety Follow-up visit, defined as 30 days  
1776 after the last trial treatment administration.  
1777

1778 All SAEs ongoing at the Safety Follow-up visit must be monitored and followed up by the  
1779 Investigator until stabilization or until the outcome is known, unless the subject is documented as  
1780 "lost to follow-up." Reasonable attempts to obtain this information must be made and  
1781 documented. It is also the responsibility of the Investigator to ensure that any necessary  
1782 additional therapeutic measures and follow-up procedures are performed.  
1783

1784

### **7.10 Pregnancy and In Utero Drug Exposure**

1785 Only pregnancies considered by the Investigator as related to trial treatment (for example,  
1786 resulting from a drug interaction with a contraceptive medication) are considered to be AEs;  
1787 however, all pregnancies with an estimated conception date during the period must be recorded  
1788 by convention in the AE page / section of the eCRF. The same rule applies to pregnancies in female  
1789 subjects and to pregnancies in female partners of male subjects. The Investigator must notify the  
1790 Sponsor or designee in an expedited manner of any pregnancy using the Pregnancy Report Form,  
1791 which must be transmitted according to the same process as described for SAE reporting in  
1792 Section 7.9.4.  
1793

1794 Investigators must actively follow up, document, and report on the outcome of all these  
1795 pregnancies, even if the subject is withdrawn from the trial. The Investigator must notify the  
1796 Sponsor or designee of these outcomes using the Pregnancy Report Form. If an abnormal outcome  
1797 occurs, the SAE Report Form will be used if the subject sustains an event, and the Parent-Child /  
1798 Fetus Adverse Event Report Form, if the child / fetus sustains an event. Any abnormal outcome  
1799 must be reported in an expedited manner as described in Section 7.9.4, while normal outcomes  
1800 must be reported within 45 days from delivery. In the event of a pregnancy in a subject occurring  
1801 during the course of the trial, the subject must be discontinued from the trial drug immediately.

## Studio CAVE (Cetuximab-AVElumab) mCRC

1802 The Sponsor or designee must be notified without delay and the subject must be followed as  
1803 mentioned above.

1804

### 1805 **7.11 Clinical Laboratory Assessments**

1806 It is essential that the Sponsor or designee be provided with a list of laboratory normal ranges  
1807 before shipment of trial drug. Any change in laboratory normal ranges during the trial will  
1808 additionally be forwarded to the CRO and the Sponsor.

1809 Blood samples will be taken from nonfasted subjects. All routine laboratory analyses will be  
1810 performed at a laboratory facility local to the trial site and relevant results must be available and  
1811 checked before administration of trial treatment. The report of the results must be retained as a  
1812 part of the subject's medical record or source documents. Blood samples for the full safety tests  
1813 listed in Table 6 will be taken from nonfasted subjects during the Screening phase (28 days prior  
1814 starting treatment), during the treatment phase as specified in Table 6 and in Appendix I, at the  
1815 End-of-Treatment visit, and at the Safety Follow-up visit.

1816 The ACTH, ANA, ANCA, RF, T4, TSH, and urinalysis will only be assessed at the time points defined  
1817 in Table 6 and Appendix I. If confirmation of a subject's postmenopausal status is necessary, a FSH  
1818 level will also be performed at Screening, see Section 7.1.

1819

1820 **Table 6. Required Full Laboratory Safety Tests**

| Full Chemistry        | Core Chemistry <sup>a</sup> | Hematology                                                                                                                                                                                                                                                                                                                                                                                       |
|-----------------------|-----------------------------|--------------------------------------------------------------------------------------------------------------------------------------------------------------------------------------------------------------------------------------------------------------------------------------------------------------------------------------------------------------------------------------------------|
| Albumin               | Alkaline phosphatase        | Absolute lymphocyte count                                                                                                                                                                                                                                                                                                                                                                        |
| Alkaline phosphatase  | ALT                         | ANC                                                                                                                                                                                                                                                                                                                                                                                              |
| ALT                   | AST                         | Hematocrit                                                                                                                                                                                                                                                                                                                                                                                       |
| Amylase               | BUN/total urea              | Hemoglobin                                                                                                                                                                                                                                                                                                                                                                                       |
| AST                   | Calcium                     | Platelet count                                                                                                                                                                                                                                                                                                                                                                                   |
| GGT                   | Chloride                    | RBC count                                                                                                                                                                                                                                                                                                                                                                                        |
| BUN/total urea        | Creatinine                  | WBC count and differential count                                                                                                                                                                                                                                                                                                                                                                 |
| Calcium               | Glucose                     | Reticulocytes                                                                                                                                                                                                                                                                                                                                                                                    |
| Chloride              | Phosphorus/Phosphates       | MCH                                                                                                                                                                                                                                                                                                                                                                                              |
| Cholesterol           | Magnesium                   | Mean corpuscular volume                                                                                                                                                                                                                                                                                                                                                                          |
| Creatine kinase       | Potassium                   | MCHC                                                                                                                                                                                                                                                                                                                                                                                             |
| Creatinine            | Sodium                      |                                                                                                                                                                                                                                                                                                                                                                                                  |
| CRP                   | Total bilirubin             |                                                                                                                                                                                                                                                                                                                                                                                                  |
| Glucose               |                             | <b>Hemostaseology</b>                                                                                                                                                                                                                                                                                                                                                                            |
| LDH                   |                             | aPTT                                                                                                                                                                                                                                                                                                                                                                                             |
| Lipase                |                             | Prothrombin time/INR                                                                                                                                                                                                                                                                                                                                                                             |
| Phosphorus/Phosphates |                             |                                                                                                                                                                                                                                                                                                                                                                                                  |
| Magnesium             |                             | <b>Basic Urinalysis</b> (dipstick, including macroscopic appearance, bilirubin, blood, color, glucose, ketones, leukocyte esterase, nitrite, pH, protein, specific gravity, urobilinogen)<br><br>Full urinalysis (dipstick plus microscopic evaluation) to be performed only at the Screening and End-of-Treatment visits and a basic urinalysis prior to each administration of the trial drug. |
| Potassium             |                             |                                                                                                                                                                                                                                                                                                                                                                                                  |
| Sodium                |                             |                                                                                                                                                                                                                                                                                                                                                                                                  |
| Total bilirubin       |                             |                                                                                                                                                                                                                                                                                                                                                                                                  |
| Total protein         |                             |                                                                                                                                                                                                                                                                                                                                                                                                  |
| Uric acid             |                             | <b>TSH and T4</b><br>To be assessed at the Screening visit,                                                                                                                                                                                                                                                                                                                                      |

## Studio CAVE (Cetuximab-AVElumab) mCRC

|                              |  |                                        |
|------------------------------|--|----------------------------------------|
|                              |  | and every 8 weeks                      |
| Triglycerides                |  |                                        |
|                              |  | <b>ACTH, ANA, ANCA, RF</b>             |
| <b>Hormone</b>               |  | To be assessed at the Screening visit, |
| FSH (yes / no if applicable) |  | Week 13, Week 25, and at the End-of    |
|                              |  | Treatment visit                        |

1821 ACTH=adrenocorticotropic hormone, ALT=alanine aminotransferase, ANA=antinuclear antibody, ANC=absolute  
 1822 neutrophil count, ANCA=antineutrophil cytoplasmic antibody, aPTT=activated partial thromboplastin time,  
 1823 AST=aspartate aminotransferase, BUN=blood urea nitrogen, CRP=C-reactive protein, FSH=follicle-stimulating hormone,  
 1824 GGT=gamma-glutamyltransferase, INR=international normalized ratio, LDH=lactate dehydrogenase, MCH=mean  
 1825 corpuscular hemoglobin, MCHC=mean corpuscular hemoglobin concentration, RBC=red blood cell, RF=rheumatoid  
 1826 factor; TSH=thyroid-stimulating hormone, T4=free thyroxine, WBC=white blood cell.

1827

1828 If a subject has a clinically significant abnormal laboratory test value that is not present at  
 1829 Baseline, the test will be repeated weekly and the subject will be followed until the test value has  
 1830 returned to the normal range or the Investigator has determined that the abnormality is chronic  
 1831 or stable.

1832

### 1833 7.12 Vital Signs, Physical Examination and Other Assessments

1834 The ECOG PS will be assessed at Screening and at subsequent visits as indicated in the Schedule of  
 1835 Assessments (Appendix I) and documented in the eCRF. Body weight will be measured at  
 1836 Screening and at subsequent visits as indicated in the Schedule of Assessments (Appendix I) and  
 1837 documented in the eCRF. Body height will be measured at Screening only.

1838 A physical examination will be conducted at Screening and at subsequent visits as indicated in the  
 1839 Schedule of Assessments (Appendix I) and documented in the eCRF (detailed description in Section  
 1840 7.1). Results of the physical examination, including any abnormalities, will be documented in the  
 1841 eCRF. Abnormal findings are to be reassessed at subsequent visits. Also a 12-lead ECG will be  
 1842 recorded as indicated in the Schedule of Assessments (Appendix I). All newly diagnosed or  
 1843 worsening conditions, signs, and symptoms observed from Screening, whether related to trial  
 1844 treatment or not, are to be reported as AEs.

1845 For female subjects of childbearing potential, a serum  $\beta$ -HCG pregnancy test will be carried out  
 1846 during the Screening phase. A urine or serum  $\beta$ -HCG test will be performed before each  
 1847 administration of trial drug during the treatment phase and at the End-of-Treatment visit. Results  
 1848 of the most recent pregnancy test should be available prior to the next dosing of trial drug.  
 1849 Subjects who are postmenopausal (age-related amenorrhea  $\geq$  12 consecutive months and  
 1850 FSH > 40 mIU/mL), or who have undergone hysterectomy or bilateral oophorectomy are exempt  
 1851 from pregnancy testing.

1852

1853

1854

1855

1856

## 1857 8 Description of Statistical Analyses

1858

### 1859 8.1 Primary Endpoint

1860 The primary endpoint of the trial is the OS, defined as the time (in months) starting treatment to  
 1861 the date of death, regardless of the actual cause of the subject's death.

1862 The survival follow-up will continue until 2 years after the last subject receives the last dose of  
 1863 avelumab and cetuximab. For subjects who are still alive at the time of data analysis or who are

## Studio CAVE (Cetuximab-AVElumab) mCRC

1864 lost to follow-up, OS time will be censored at the last recorded date that the subject is known to  
1865 be alive (date of last contact, last visit date, date of last trial treatment administration, or date of  
1866 last scan, whichever is the latest) as of the data cut-off date for the analysis. If the date of last  
1867 known status of alive or death date is after the data cut-off date, subjects will be censored at the  
1868 data cut-off date.

### 1870 8.2 Secondary Endpoints

#### 1872 8.2.1 Progression-Free Survival

1873 The PFS will be determined according to RECIST 1.1. It is defined as the time from date of starting  
1874 treatment until date of the first documentation of PD or death by any cause (whichever occurs  
1875 first).

#### 1877 8.2.2 Overall response rate (ORR)

1878 The ORR will be determined according to RECIST 1.1. The ORR is defined as the proportion of all  
1879 randomized subjects with a confirmed Best Overall Response (BOR) of PR or CR according to  
1880 RECIST 1.1. The BOR is defined as the best response obtained among all tumor assessment visits  
1881 after the date of starting treatment until documented disease progression.

#### 1883 8.2.3 Safety Endpoints

1884 Safety endpoints include AEs, clinical laboratory assessments, vital signs, physical examination,  
1885 ECG parameters, and ECOG PS

### 1889 8.3 Description of Statistical Analyses

#### 1891 8.3.1 General Considerations

1892 Baseline characteristics summary and the efficacy analysis will be performed on the total  
1893 population enrolled in the study.

1894 In order to provide overall estimates of treatment effects, data will be pooled across trial centers.

1895 In general, descriptive summaries will be presented for the efficacy and safety variables collected.  
1896 Continuous variables will be summarized using mean, standard deviation, minimum, median, and  
1897 maximum. Categorical variables will be summarized using frequency counts and percentages.

#### 1899 8.3.2 Analysis of Primary Endpoint

1901 The primary endpoint of this trial is OS. The primary analysis population will be the ITT population.  
1902 We consider the results from phase 3 studies with standard third line treatment as comparator  
1903 (CORRECT, RECOURSE). The current study aims to demonstrate a median OS of 11.0 months  
1904 (alternative hypothesis) by experimental combination for comparison with historical median OS  
1905 8.0 (null hypothesis) with standard third line treatment, which correspond to an improvement of  
1906 OS at 6 months from 35% to 46%. It was estimated that we would need to enroll 66 patients to  
1907 achieve with a 1-sided 5% level test in this single stage, single arm trial. The accrual period will be  
1908 of 18 months and the total duration of the stud will be of 36 months. Considering a potential  
1909 drop-out of approximately 15% of patients a total of 75 patients will be recruited.

## **Studio CAVE (Cetuximab-AVElumab) mCRC**

1912

### **1913 8.3.3 Analysis of Secondary Endpoints**

1914 Secondary efficacy analyses will be performed on the ITT analysis set.

1915 For the secondary endpoint analysis of PFS time according to RECIST 1.1 the statistical analysis will  
1916 be the same as described for the primary analysis of OS time.

1917

1918 For the secondary endpoint analysis of ORR according to RECIST 1.1, the ORR in terms of having a  
1919 confirmed BOR of CR or PR will be calculated along with corresponding two-sided exact Clopper-  
1920 Pearson 95% CIs.

1921

## **1922 9 Ethical and Regulatory Aspects**

### **1923 9.1 Responsibilities of the Investigator**

1924 The Investigator is responsible for the conduct of the trial at his/her site. He/she will ensure that  
1925 the trial is performed in accordance with the clinical trial protocol and with the ethical principles  
1926 that have their origin in the Declaration of Helsinki, as well as with the ICH Note for Guidance on  
1927 GCP (ICH Topic E6, 1996) and applicable regulatory requirements. In particular, the Investigator  
1928 must ensure that only subjects who have given their informed consent are included in the trial.

1929 In 1998, the USA FDA introduced a regulation (21 Code of Federal Regulations, Part 54) entitled  
1930 "Financial Disclosure by Clinical Investigators." For trials conducted in any country that could result  
1931 in a product submission to the FDA for marketing approval and could contribute significantly to  
1932 the demonstration of efficacy and safety of the trial drug (named "covered trials" by the FDA), the  
1933 Investigator and all sub-Investigators are obliged to disclose any financial interest that they, their  
1934 spouses, or their dependent children may have in the Sponsor or the Sponsor's product under  
1935 study. This information is required during the trial and for 12 months following completion of the  
1936 trial.

### **1937 9.2 Subject Information and Informed Consent**

1938 An unconditional prerequisite for a subject's participation in the trial is his/her written informed  
1939 consent. The subject's written informed consent to participate in the trial must be given before  
1940 any trial-related activities are carried out. A separate specific PGx ICF will be provided to subjects  
1941 who are willing to participate in this optional procedure, which refers to the extraction and  
1942 analysis of DNA from blood and/or tumor biopsy in order to better understand how gene(s) may  
1943 affect the efficacy of avelumab.

1944 Adequate information must therefore be given to the subject by the Investigator before informed  
1945 consent is obtained (a person designated by the Investigator may give the information, if  
1946 permitted by local regulations). A subject information sheet in the local language and prepared in  
1947 accordance with the Note for Guidance on GCP (ICH Topic E6, 1996) will be provided by the  
1948 Sponsor for the purpose of obtaining informed consent. In addition to providing this written  
1949 information to a potential subject, the Investigator or his / her designate will inform the subject  
1950 verbally of all pertinent aspects of the trial. The language used in doing so must be chosen so that  
1951 the information can be fully and readily understood by lay persons.

1952 Depending on national regulations, a person other than the Investigator may inform the subject  
1953 and sign the ICF, as above.



## **Studio CAVE (Cetuximab-AVElumab) mCRC**

1954 Where the information is provided by the Investigator, the ICF must be signed and personally  
1955 dated by the subject and the Investigator.

1956 The signed and dated declaration of informed consent will remain at the Investigator's site, and  
1957 must be safely archived by the Investigator so that the forms can be retrieved at any time for  
1958 monitoring, auditing, and inspection purposes. A copy of the signed and dated information and ICF  
1959 should be provided to the subject prior to participation.

1960 Whenever important new information becomes available that may be relevant to the subject's  
1961 consent, the written subject information sheet and any other written information provided to  
1962 subjects will be revised by the Sponsor or designee and be submitted again to the IEC / IRB for  
1963 review and favorable opinion. The agreed, revised information will be provided to each subject in  
1964 the trial for signing and dating. The Investigator will explain the changes to the previous version.

### **1965 9.3 Subject Identification and Privacy**

1966 A unique subject number will be assigned to each subject at inclusion immediately after informed  
1967 consent has been obtained. This number will serve as the subject's identifier in the trial as well as  
1968 in the clinical trial database.

1969 The subject's data collected in the trial will be stored under this number. Only the Investigator will  
1970 be able to link the subject's trial data to the subject via an identification list kept at the site. The  
1971 subject's original medical data that are reviewed at the site during source data verification by the  
1972 Clinical Trial Monitor, audits, and Health Authority inspections will be kept strictly confidential.

1973 Data protection and privacy regulations will be observed in capturing, forwarding, processing, and  
1974 storing subject data. Subjects will be informed accordingly and will be requested to give their  
1975 consent on data handling procedures in accordance with national regulations.

### **1976 9.4 Emergency Medical Support and Subject Card**

1977 Subjects enrolled in this clinical trial will be provided with Emergency Medical Support cards  
1978 during their trial participation, which will be furnished by the Sponsor or designee. The Emergency  
1979 Medical Support card is based on the need to provide clinical trial subjects with a way of  
1980 identifying themselves as participating in a clinical trial, and subsequently to give health care  
1981 providers access to the information about this participation that may be needed to determine the  
1982 course of the subject's medical treatment.

1983 This service is designed to provide information to health care providers who are not part of the  
1984 clinical trial.

1985 Clinical trial Investigators, who are already aware of the clinical trial protocol and treatment, have  
1986 other means of accessing the necessary medical information for the management of emergencies  
1987 occurring in their subjects.

1988 The first point of contact for all emergencies will be the clinical trial Investigator caring for the  
1989 affected subject. The Investigator agrees to provide his or her emergency contact information on  
1990 the card for this purpose. If the Investigator is available when an event occurs, she or he will  
1991 answer any questions. Any subsequent action will follow the standard processes established for  
1992 the Investigators.

## **Studio CAVE (Cetuximab-AVElumab) mCRC**

### **1993 9.5 Clinical Trial Insurance and Compensation to Subjects**

1994 Insurance coverage shall be provided for each center participating in the trial. Insurance  
1995 conditions shall meet good local standards, as applicable.

### **1996 9.6 Independent Ethics Committee or Institutional Review Board**

1997 Prior to commencement of the trial at a given site, the clinical trial protocol will be submitted  
1998 together with its associated documents (such as the ICF) to the responsible IEC/IRB for its  
1999 favorable opinion / approval. The written favorable opinion/approval of the IEC/IRB will be filed in  
2000 the Investigator Site File, and a copy will be filed with the CRO.

2001 The trial must not start at a site before the Sponsor or designee has obtained written confirmation  
2002 of favorable opinion / approval from the concerned IEC/IRB. The IEC/IRB will be asked to provide  
2003 documentation of the date of the meeting at which the favorable opinion/approval was given, and  
2004 of the members and voting members present at the meeting. Written evidence of favorable  
2005 opinion / approval that clearly identifies the trial, the clinical trial protocol version, and the Subject  
2006 Information and ICF version reviewed should be provided. Where possible, copies of the meeting  
2007 minutes should be obtained.

2008 Amendments to the clinical trial will also be submitted to the concerned IEC/IRB before  
2009 implementation in case of substantial changes (see Section 10.5). Relevant safety information will  
2010 be submitted to the IEC/IRB during the course of the trial in accordance with national regulations  
2011 and requirements.

### **2012 9.7 Health Authorities**

2013 The clinical trial protocol and any applicable documentation (for example, Investigational  
2014 Medicinal Product Dossier, Subject Information, and ICF) will be submitted or notified to the  
2015 Health Authorities in accordance with the regulations of the countries involved in the trial.

## **2016 10 Trial Management**

### **2017 10.1 Case Report Form Handling**

2018 The Investigator or designee will be responsible for entering trial data in the eCRF provided by the  
2019 CRO and follow the data entry guidelines. It is the Investigator's responsibility to ensure the  
2020 accuracy of the data entered in the eCRFs and to sign the case report forms.

2021 The data will be entered into a validated database. The CRO will follow the standards of the  
2022 Sponsor in the database design and data structure. The CRO will be responsible for data review  
2023 and processing, in accordance with the CRO's data management procedures. Database lock will  
2024 occur once quality control procedures and quality assurance procedures (if applicable) have been  
2025 completed. Copies of the eCRFs will be provided to the Investigators at the completion of the trial.

### **2026 10.2 Source Data and Subject Files**

2027 The Investigator must keep a subject file (medical file, original medical records) on paper or  
2028 electronically for every subject included in the trial. This file will contain the available demographic  
2029 and medical information for the subject, and should be as complete as possible.

## Studio CAVE (Cetuximab-AVElumab) mCRC

2030 In particular, the following data should be available in this file:

- 2031 - Subject's full name
- 2032 - Date of birth
- 2033 - Sex
- 2034 - Race
- 2035 - Height
- 2036 - Weight
- 2037 - Medical history and concomitant diseases
- 2038 - Prior and concomitant therapies (including changes during the trial)
- 2039 - Tumor disease information
- 2040 - Trial identification
- 2041 - Date of subject's inclusion into the trial (that is, date of giving informed consent)
- 2042 - Subject number in the trial
- 2043 - Dates of the subject's visits to the site
- 2044 - Any medical examinations and clinical findings predefined in the clinical trial protocol
- 2045 - All AEs observed in the subject
- 2046 - Date of subject's end of trial
- 2047 - Date of and reason for early withdrawal of the subject from the trial or from trial drug, if
- 2048 applicable

2049 It must be possible to identify each subject by using this subject file.

2050 Additionally, any other documents containing source data must be filed. This includes original  
2051 printouts of data recorded or generated by automated instruments, photographic negatives, X-  
2052 rays, CT or MRI scan images, ECG recordings, laboratory value listings, etc. Such documents must  
2053 include at least the subject number and the date when the procedure was performed. Information  
2054 should be printed by the instrument used to perform the assessment or measurement, if possible.  
2055 Information that cannot be printed by an automated instrument will be entered manually.  
2056 Medical evaluation of such records should be documented as necessary and the documentation  
2057 signed and dated by the Investigator.

### 2058 **10.3 Investigator Site File and Archiving**

2059 The Investigator will be provided with an Investigator Site File upon initiation of the trial. This file  
2060 will contain all documents necessary for the conduct of the trial and will be updated and  
2061 completed throughout the trial. It must be available for review by the Monitor, and must be ready  
2062 for Sponsor audit as well as for inspection by Health Authorities during and after the trial, and  
2063 must be safely archived for at least 15 years (or per local requirements or as otherwise notified by  
2064 the Sponsor) after the end of the trial. The documents to be archived include the Subject  
2065 Identification List and the signed subject ICFs. If archiving of the Investigator Site File is no longer  
2066 possible at the site, the Investigator must notify the Sponsor.

2067 All original subject files (medical records) must be stored at the site (hospital, research institute, or  
2068 practice) for the longest possible time permitted by the applicable regulations, and / or as per ICH  
2069 GCP guidelines, whichever is longer. In any case, the Investigator should ensure that no  
2070 destruction of medical records is performed without the written approval of the Sponsor.

2071

## **Studio CAVE (Cetuximab-AVElumab) mCRC**

### **2072 10.4 Monitoring, Quality Assurance, and Inspection by Health Authorities**

2073 This trial will be monitored in accordance with the ICH Note for Guidance on GCP (ICH Topic E6,  
2074 1996). The Clinical Trial Monitor will perform visits to the trial site at regular intervals.

2075 Representatives of the Sponsor's Quality Assurance unit or a designated organization, as well as  
2076 Health Authorities, must be permitted to inspect all trial-related documents and other materials at  
2077 the site, including the Investigator Site File, the completed eCRFs, the trial drug, and the subjects'  
2078 original medical records/files.

2079 The clinical trial protocol, each step of the data capture procedure, and the handling of the data,  
2080 including the final clinical trial report, will be subject to independent quality assurance activities.  
2081 Audits may be conducted at any time during or after the trial to ensure the validity and integrity of  
2082 the trial data.

### **2083 10.5 Changes to the Clinical Trial Protocol**

2084 Changes to the clinical trial protocol will be documented in written protocol amendments. Major  
2085 (substantial, significant) amendments will usually require submission to the Health Authorities and  
2086 to the relevant IEC/IRB for approval or favorable opinion. In such cases, the amendment will be  
2087 implemented only after approval or favorable opinion has been obtained.

2088 Minor (nonsubstantial) protocol amendments, including administrative changes, will be filed by  
2089 the Sponsor and at the site. They will be submitted to the relevant IEC/IRB or to Health Authorities  
2090 only where requested by pertinent regulations.

2091 Any amendment that could have an impact on the subject's agreement to participate in the trial  
2092 requires the subject's informed consent prior to implementation (see Section 9.2).

### **2093 10.6 Clinical Trial Report and Publication Policy**

#### **2094 10.6.1 Clinical Trial Report**

2095 After completion of the trial, a clinical trial report according to ICH Topic E3 will be written by the  
2096 Sponsor in consultation with the Coordinating Investigator.

#### **2097 10.6.2 Publication**

2098 The first publication will be a publication of the results of the analysis of the primary endpoint(s)  
2099 that will include data from all trial sites.

2100 The Investigator will inform the Sponsor in advance about any plans to publish or present data  
2101 from the trial. Any publications and presentations of the results (abstracts in journals or  
2102 newspapers, oral presentations, etc), either in whole or in part, by Investigators or their  
2103 representatives will require presubmission review by the Sponsor. The Sponsor will not suppress  
2104 or veto publications, but maintains the right to delay publication in order to protect intellectual  
2105 property rights.

2106

2107

2108  
2109  
2110  
2111  
2112  
2113  
2114  
2115  
2116  
2117  
2118  
2119  
2120  
2121  
2122  
2123  
2124  
2125  
2126  
2127  
2128  
2129  
2130  
2131  
2132  
2133  
2134  
2135  
2136  
2137  
2138  
2139  
2140  
2141  
2142  
2143  
2144  
2145  
2146  
2147  
2148  
2149  
2150  
2151

**12. References**

**References**

1. Torre LA, Bray F, Siegel RL, Ferlay J, Lortet-Tieulent J, Jemal A. Global cancer statistics, 2012. *CA Cancer J Clin.* 2015;65:87-108
2. Schmoll HJ, Van Cutsem E, Stein A, Valentini V, Glimelius B, Haustermans K, Nordlinger B, van de Velde CJ, Balmana J, Regula J. ESMO Consensus Guidelines for management of patients with colon and rectal cancer. a personalized approach to clinical decision making. *AnnOncol.* 2012;23:2479-2516.
3. Van Cutsem E, Cervantes A, Nordlinger B, Arnold D. Metastatic colorectal cancer: ESMO Clinical Practice Guidelines for diagnosis, treatment and follow-up. *Ann Oncol.* 2014;25Suppl 3:iii1-iii9.
4. Mayer RJ, Van Cutsem E, Falcone A, Yoshino T, Garcia-Carbonero R, Mizunuma N, Yamazaki K, Shimada Y, Tabernero J, Komatsu Y. Randomized trial of TAS-102 for refractory metastatic colorectal cancer. *N Engl J Med.* 2015;372:1909-1919.
5. Wadlow RC et al. Panitumumab in patients with KRAS wild-type colorectal cancer after progression on cetuximab. *Oncologist* 2012; 17: 14
6. Saif MW et al. Efficacy of panitumumab therapy after progression with cetuximab: experience at two institutions. *Clin Colorectal Cancer* 2010; 9: 315-318
7. Santini D et al. Cetuximab rechallenge in metastatic colorectal cancer patients: how to come away from acquired resistance *Ann Oncol.* 2012 Sep;23(9):2313-8.
8. Hauschild A et al. Checkpoint inhibitors: a new standard of care for advanced Merkelcell carcinoma *Lancet Oncol.* 2016, 17(10): 1337–1339
9. P.Correale et al. Cetuximab ±chemotherapy enhances dendritic cell-mediated phagocytosis of colon cancer cells and ignites a highly efficient colon cancer antigen specific cytotoxic T-cell response *in vitro.* *Int.J.cancer* 2012. 130: 1577-1589
10. Marechal R et al. Putative contribution of CD56 positive cells in cetuximab treatment efficacy in first line metastatic colorectal cancer patients. *BMC Cancer* 2010.10,340.
11. Dechant M et al. Complement-dependent tumor cell lysis triggered by combinations of epidermal growth factor receptors antibodies. *Cancer Res.*2008.68, 4998-5003.
12. Baselga J. The EGFR as a target for anticancer therapy – focus on cetuximab. *Eur J Cancer* 2001; 37(Suppl 4):S16-22.
13. Fan Z, Baselga J, Masui H, Mendelsohn J. Antitumor effect of anti-epidermal growth factor receptor monoclonal antibodies plus cis-diamminedichloroplatinum on well established A431 cell xenografts. *Cancer Res* 1993; 53: 4637-4642.
14. Milas L, Mason K, Hunter N, et al. In vivo enhancement of tumor radioresponse by C225 anti-epidermal growth factor receptor antibody. *Clin Cancer Res* 2000;6:701-708.
15. Yarden Y. The EGFR family and its ligands in human cancer. signalling mechanisms and therapeutic opportunities. *Eur J Cancer* 2001; 37 Suppl 4:S3-8

## Studio CAVE (Cetuximab-AVElumab) mCRC

- 2152 16. Folprecht G, Lutz MP, Schoffski P, et al. Cetuximab and irinotecan/5-fluorouracil/folinic acid  
2153 is a safe combination for the first-line treatment of patients with epidermal growth factor  
2154 receptor expressing metastatic colorectal carcinoma. *Ann Oncol* 2006;17:450-456
- 2155 17. Wilke H, Glynn-Jones R, Thaler J, et al. MABEL – A large multinational study of cetuximab  
2156 plus irinotecan in irinotecan resistant metastatic colorectal cancer. *J Clin Oncol*  
2157 2006;24(18S):Abstract 3549
- 2158 18. Salomon DS, Brandt R, Ciardiello F, Normanno N. Epidermal growth factor-related  
2159 peptides and their receptors in human malignancies. *Crit Rev Oncol Hematol* 1995; 19:183-  
2160 232
- 2161 19. Erbitux SmPC (Feb 2007)
- 2162 20. Bonner JA, Harari PM, Giralt J, et al. Radiotherapy plus Cetuximab for Squamous-Cell  
2163 Carcinoma of the Head and Neck. *New Engl J Med*. 2006; 354:567-78
- 2164 21. Siena S, Glynn-Jones R, Thaler J, et al. MABEL - A large multinational study of cetuximab  
2165 plus irinotecan in irinotecan-resistant metastatic colorectal cancer: Update on infusion  
2166 related reactions (IRR). *ASCO Gastrointestinal Cancers Symposium 2007:Abstract 353*
- 2167 22. Howard SC, Jones DP, Pui CH. The tumor lysis syndrome. *N Engl J Med* 2011; 364(19):1844-  
2168 54.
- 2169  
2170  
2171  
2172  
2173  
2174  
2175  
2176  
2177  
2178  
2179  
2180  
2181  
2182  
2183  
2184  
2185  
2186  
2187  
2188  
2189  
2190  
2191  
2192  
2193  
2194  
2195  
2196  
2197  
2198  
2199

**Studio CAVE (Cetuximab-AVElumab) mCRC**

2200  
2201  
2202  
2203  
2204  
2205  
2206  
2207  
2208  
2209  
2210  
2211  
2212  
2213  
2214  
2215  
2216  
2217  
2218  
2219  
2220  
2221  
2222  
2223  
2224  
2225

2226 **11. Appendices**

Studio CAVE (Cetuximab-AVElumab) mCRC

2227 Appendix I Schedules of Assessments

2228 Table 7. Screening/Baseline, Treatment Phase and Follow-up procedures

| Measure                                                   | Screening/<br>Baseline<br>Assesments | Treatment Phase <sup>a</sup> |    |     |     |     |     |     | Until<br>Progression | Discontinuation(x)/<br>End-of-Treatment<br>Visit (X)                | Safety<br>Follow-up<br>Visit                     | Long-term<br>Follow-up <sup>b</sup>     |
|-----------------------------------------------------------|--------------------------------------|------------------------------|----|-----|-----|-----|-----|-----|----------------------|---------------------------------------------------------------------|--------------------------------------------------|-----------------------------------------|
|                                                           | Day -28 to<br>starting<br>treatment  | V1                           | V2 | V3  | V4  | V5  | V6  | V7  |                      | Up to 7/28 Days<br>(±5 days) after Last<br>Treatment <sup>c,d</sup> | 12 Weeks<br>(±2weeks)<br>after Last<br>Treatment | Every 3 moths<br>(±1 week) <sup>b</sup> |
|                                                           |                                      | W1                           | W2 | W3  | W4  | W5  | W6  | W7  |                      |                                                                     |                                                  |                                         |
|                                                           |                                      | D1                           | D8 | D15 | D21 | D28 | D35 | D43 |                      |                                                                     |                                                  |                                         |
| Written Informed Consent                                  | X                                    |                              |    |     |     |     |     |     |                      |                                                                     |                                                  |                                         |
| Collection of tumor tissue<br>(when available)            | X                                    |                              |    |     |     |     |     |     |                      |                                                                     |                                                  |                                         |
| Inclusion/exclusion<br>criteria                           | X                                    |                              |    |     |     |     |     |     |                      |                                                                     |                                                  |                                         |
| Medical history <sup>e</sup>                              | X                                    |                              |    |     |     |     |     |     |                      |                                                                     |                                                  |                                         |
| Demographic data                                          | X                                    |                              |    |     |     |     |     |     |                      |                                                                     |                                                  |                                         |
| HBV and HCV testing                                       | X                                    |                              |    |     |     |     |     |     |                      |                                                                     |                                                  |                                         |
| Physical examination,<br>including Height at<br>Screening | X                                    | X                            | X  | X   | X   | X   | X   | X   | 1 week               | x/X                                                                 | X                                                |                                         |
| Vital Signs                                               | X                                    | X                            | X  | X   | X   | X   | X   | X   | 1 week               | x/X                                                                 | X                                                |                                         |
| Weight                                                    | X                                    | X                            | X  | X   | X   | X   | X   | X   | 1week                | x/X                                                                 | X                                                |                                         |
| ECOG PS                                                   | X <sup>f</sup>                       | X                            | X  | X   | X   | X   | X   | X   |                      | x/X                                                                 | X                                                |                                         |
| Enrollment (if eligible) <sup>g</sup>                     | X                                    |                              |    |     |     |     |     |     |                      |                                                                     |                                                  |                                         |
| Cardiac assessment <sup>h</sup>                           | X                                    |                              |    |     |     |     |     |     |                      | x/X                                                                 |                                                  |                                         |
| Ophthalmologicassessment <sup>i</sup>                     | X                                    |                              |    |     |     |     |     |     |                      |                                                                     |                                                  |                                         |
| Hematology and<br>hemostaseology                          | X                                    | X                            |    | X   |     | X   |     | X   | 2 weeks              | x/X                                                                 | X                                                |                                         |
| Full serum chemistry <sup>j</sup>                         | X                                    | X                            |    | X   |     | X   |     | X   | 2 weeks              | x/X                                                                 | X                                                |                                         |
| Measure                                                   | Screening/<br>Baseline<br>Assesments | Treatment Phase              |    |     |     |     |     |     | Until<br>Progression | Discontinuation(x)/<br>End-of-Treatment<br>Visit (X)                | Safety<br>Follow-up<br>Visit                     | Long-term<br>Follow-up <sup>b</sup>     |
|                                                           | Day -28 to<br>starting<br>treatment  | V1                           | V2 | V3  | V4  | V5  | V6  | V7  |                      | Up to 7/28 Days<br>(±5 days) after Last<br>Treatment <sup>c,d</sup> | 12 Weeks<br>(±2weeks)<br>after Last<br>Treatment | Every 3 moths<br>(±1 week) <sup>b</sup> |
|                                                           |                                      | W1                           | W2 | W3  | W4  | W5  | W6  | W7  |                      |                                                                     |                                                  |                                         |
|                                                           |                                      | D1                           | D8 | D15 | D21 | D28 | D35 | D43 |                      |                                                                     |                                                  |                                         |



## Studio CAVE (Cetuximab-AVElumab) mCRC

| Measure                                                                                                             |   |   |   |   |   |   |   |   |   |                                                   | Treatment |   |   |
|---------------------------------------------------------------------------------------------------------------------|---|---|---|---|---|---|---|---|---|---------------------------------------------------|-----------|---|---|
| Urinalysis <sup>k</sup>                                                                                             | X | X |   | X |   |   | X |   | X | 2 weeks                                           | x/X       | X |   |
| β-HCG pregnancy test <sup>l</sup>                                                                                   | X |   |   |   |   |   | X |   |   | 28 days                                           | -/X       | X |   |
| Tumor evaluation by CT scan or MRI (a bone scan should be done at Screening as clinically indicated) <sup>m,n</sup> | X |   |   |   |   |   |   |   | X | 8 weeks for 40weeks and every 12 weeks thereafter | -/X       |   | X |
| Documentation of AEs and concomitant medications <sup>o</sup>                                                       | X | X | X | X | X | X | X | X | X | 1 week                                            | x/X       | X | X |
| ACTH, ANA, ANCA, RF                                                                                                 | X |   |   |   |   |   |   |   |   | Week 13, week 25, as indicated                    | -/X       | X |   |
| T4, and TSH                                                                                                         | X |   |   |   |   |   |   |   |   | 8 weeks                                           | -/X       | X |   |
| Pretreatment and trial drug administration <sup>p</sup>                                                             |   | X | X | X | X | X | X | X | X | 1 week                                            |           |   |   |

2229

2230

2231

2232

2233

2234

ACTH=adrenocorticotrophic hormone, ADR=adverse drug reaction; AE=adverse events,ALT=alanine aminotransferase, ANA=antinuclear antibody, ANCA=antineutrophil cytoplasmic antibody, AST=aspartate aminotransferase,β-HCG=β-human chorionic gonadotropin, BUN=blood urea nitrogen, CR= complete response, CT=computedtomography, D=Day, ECG=electrocardiogram, ECOG PS=Eastern Cooperative Oncology GroupPerformance Status, HAHA=human antihuman antibody, HBV=hepatitis B virus, HCV=hepatitis C virus, ICF=Informed Consent Form, IV=intravenous, MRI=magnetic resonance imaging, PR=partial response, RECIST=ResponseEvaluation Criteria in Solid Tumors version 1.1, RF=rheumatoid factor, T4=free thyroxine, TSH=thyroidstimulating hormone, V=visit, W=Week.

2235

2236

2237

2238

2239

2240

2241

2242

2243

2244

2245

2246

2247

2248

aA time window of up to 1 day before or 1 day after the scheduled visit day (-1 / +1 days) will be permitted for all trial procedures. The calculation of the dose of avelumab will be based on the weight of the subject determined on the day prior to or the day of each drug administration. Complete blood count and core chemistry samples must also be drawn and results reviewed within 48 hours prior to dose administration.

b Subjects with an SAE ongoing at the Safety follow-up must be monitored and followed up by the Investigator until stabilization or until the outcome is known, unless the subject is documented as "lost to follow-up." Any SAE assessed as related to IMP must be reported whenever it occurs, irrespective of the time elapsed since the last administration of IMP. Subjects without progressive disease at End-of-Treatment visit will be followed up for disease progression (CT / MRI scans every 6 weeks [±5days]) for up to 1 year. In addition, survival information (including assessment of any further anticancer therapy) will be collected quarterly (that is, every 3 months ±1week). The survival follow-up will continue until 2 years after the last subject receives the last dose of avelumab (see Section 7.5. for details).

c Tumor evaluation at the End-of-Treatmentvisit should only be performed if no disease progression has beendocumented previously

d If another antineoplastic therapy is administered before the end of this 28-day period, the End-of-Treatmentvisit should be conducted,if possible,prior to the start of this new therapy.

e Medical history should includehistory of mCRC, previous and ongoing medications, , and Baselinemedical condition.

f If the ScreeningECOGPSwas performed within 3 days prior to Day 1,it does not have to be repeated at Visit 1.

g Enrollment will be done after the confirmation of fulfilling all screening inclusion criteria without matching any exclusion criterion (Section5.6.1).

## Studio CAVE (Cetuximab-AVElumab) mCRC

|      |                 |                                                                                                                                                                                                                                                                                                                                                                                                                                                                                                                                                                                                                                                                                                          |                                                                                       |
|------|-----------------|----------------------------------------------------------------------------------------------------------------------------------------------------------------------------------------------------------------------------------------------------------------------------------------------------------------------------------------------------------------------------------------------------------------------------------------------------------------------------------------------------------------------------------------------------------------------------------------------------------------------------------------------------------------------------------------------------------|---------------------------------------------------------------------------------------|
| 2249 | h               | Cardiac assessment includes: 12-lead ECG that should be assessed during screening and at the Discontinuation / End-of-Treatment visit and                                                                                                                                                                                                                                                                                                                                                                                                                                                                                                                                                                | Left-ventricular function evaluation (echocardiogram or multigated acquisition scan). |
| 2250 |                 |                                                                                                                                                                                                                                                                                                                                                                                                                                                                                                                                                                                                                                                                                                          |                                                                                       |
| 2251 | l               | Ophthalmologic assessment : visual acuity and slit-lamp test                                                                                                                                                                                                                                                                                                                                                                                                                                                                                                                                                                                                                                             |                                                                                       |
| 2252 | j               | Full chemistry includes core serum chemistry and other laboratory studies are detailed in Table 6. Follicle-stimulating hormone at Screening, if applicable (Section 7.1).                                                                                                                                                                                                                                                                                                                                                                                                                                                                                                                               |                                                                                       |
| 2253 | k               | Full urinalysis (dipstick plus microscopic evaluation) at the Screening and End-of-Treatment visits and a basic urinalysis (dipstick only) at each visit indicated prior to administration of trial drug. If the basic urinalysis is abnormal, then a full urinalysis should be performed.                                                                                                                                                                                                                                                                                                                                                                                                               |                                                                                       |
| 2254 |                 |                                                                                                                                                                                                                                                                                                                                                                                                                                                                                                                                                                                                                                                                                                          |                                                                                       |
| 2255 | l               | $\beta$ -HCG should be determined from serum at Screening and from a urine or serum sample thereafter. Results of the most recent pregnancy test should be available prior to next dosing of trial drug.                                                                                                                                                                                                                                                                                                                                                                                                                                                                                                 |                                                                                       |
| 2256 |                 |                                                                                                                                                                                                                                                                                                                                                                                                                                                                                                                                                                                                                                                                                                          |                                                                                       |
| 2257 | m               | In general, the tumor visit time window is 5 days prior to the scheduled tumor assessment. In case a tumor response according to RECIST 1.1 is documented during the course of the trial, confirmation of the response should be performed according to RECIST 1.1, preferably at the regularly scheduled 6-week assessment interval, but no sooner than 5 weeks after the initial documentation of CR or PR. Confirmation of PR can be confirmed at an assessment later than the next assessment after the initial documentation of PR. A CT scan or MRI should always be used (if MRI is used, CT of chest is mandatory in all countries except Germany, in which case a MRI of the chest is allowed). |                                                                                       |
| 2258 |                 |                                                                                                                                                                                                                                                                                                                                                                                                                                                                                                                                                                                                                                                                                                          |                                                                                       |
| 2259 | n               | A brain CT / MRI scan is required at Screening if not performed within 6 weeks prior to starting treatment, and beyond as clinically indicated. A bone scan should be done as clinically indicated at Screening and beyond. Bone metastases detected at Screening need to be followed at the tumor evaluation visits.                                                                                                                                                                                                                                                                                                                                                                                    |                                                                                       |
| 2260 |                 |                                                                                                                                                                                                                                                                                                                                                                                                                                                                                                                                                                                                                                                                                                          |                                                                                       |
| 2261 | o               | Adverse events and concomitant medications will be documented at each trial visit. The AE reporting period for safety surveillance begins when the subject is initially included in the trial (date of first signature of informed consent) and continues through the trial's End of Treatment visit, defined as 28 days ( $\pm$ 5 days) after last trial drug administration. After the End of Treatment visit only treatment related AEs have to be documented until the Safety Follow up visit, defined as 12 weeks ( $\pm$ 2 weeks) after the last trial treatment administration.                                                                                                                   |                                                                                       |
| 2262 |                 |                                                                                                                                                                                                                                                                                                                                                                                                                                                                                                                                                                                                                                                                                                          |                                                                                       |
| 2263 | p               | Premedication: in order to mitigate infusion related reactions, a premedication with an antihistamine and with paracetamol (acetaminophen) 30 to 60 minutes prior to the infusions of avelumab plus cetuximab is mandatory (for example, 25 50 mg diphenhydramine and 500 650 mg paracetamol IV or oral). This may be modified based on local treatment standards and guidelines, as appropriate.                                                                                                                                                                                                                                                                                                        |                                                                                       |
| 2264 |                 |                                                                                                                                                                                                                                                                                                                                                                                                                                                                                                                                                                                                                                                                                                          |                                                                                       |
| 2265 |                 |                                                                                                                                                                                                                                                                                                                                                                                                                                                                                                                                                                                                                                                                                                          |                                                                                       |
| 2266 |                 |                                                                                                                                                                                                                                                                                                                                                                                                                                                                                                                                                                                                                                                                                                          |                                                                                       |
| 2267 |                 |                                                                                                                                                                                                                                                                                                                                                                                                                                                                                                                                                                                                                                                                                                          |                                                                                       |
| 2268 |                 |                                                                                                                                                                                                                                                                                                                                                                                                                                                                                                                                                                                                                                                                                                          |                                                                                       |
| 2269 |                 |                                                                                                                                                                                                                                                                                                                                                                                                                                                                                                                                                                                                                                                                                                          |                                                                                       |
| 2270 |                 |                                                                                                                                                                                                                                                                                                                                                                                                                                                                                                                                                                                                                                                                                                          |                                                                                       |
| 2271 |                 |                                                                                                                                                                                                                                                                                                                                                                                                                                                                                                                                                                                                                                                                                                          |                                                                                       |
| 2272 |                 |                                                                                                                                                                                                                                                                                                                                                                                                                                                                                                                                                                                                                                                                                                          |                                                                                       |
| 2273 |                 |                                                                                                                                                                                                                                                                                                                                                                                                                                                                                                                                                                                                                                                                                                          |                                                                                       |
| 2274 |                 |                                                                                                                                                                                                                                                                                                                                                                                                                                                                                                                                                                                                                                                                                                          |                                                                                       |
| 2275 |                 |                                                                                                                                                                                                                                                                                                                                                                                                                                                                                                                                                                                                                                                                                                          |                                                                                       |
| 2276 |                 |                                                                                                                                                                                                                                                                                                                                                                                                                                                                                                                                                                                                                                                                                                          |                                                                                       |
| 2277 |                 |                                                                                                                                                                                                                                                                                                                                                                                                                                                                                                                                                                                                                                                                                                          |                                                                                       |
| 2278 |                 |                                                                                                                                                                                                                                                                                                                                                                                                                                                                                                                                                                                                                                                                                                          |                                                                                       |
| 2279 |                 |                                                                                                                                                                                                                                                                                                                                                                                                                                                                                                                                                                                                                                                                                                          |                                                                                       |
| 2280 |                 |                                                                                                                                                                                                                                                                                                                                                                                                                                                                                                                                                                                                                                                                                                          |                                                                                       |
| 2281 | <b>Table 8.</b> | <b>Soluble factors, Gene Expression profiling and Immunogenicity sampling times</b>                                                                                                                                                                                                                                                                                                                                                                                                                                                                                                                                                                                                                      |                                                                                       |

**Studio CAVE (Cetuximab-AVElumab) mCRC**

| Measure                                 | Screening/<br>Baseline<br>Assesments | Treatment Phase <sup>a</sup> |                      |                      |                      |                      |
|-----------------------------------------|--------------------------------------|------------------------------|----------------------|----------------------|----------------------|----------------------|
|                                         | Day -28 to<br>starting<br>treatment  | V1                           | V3                   | V5                   | V7                   | Until<br>Progression |
|                                         |                                      | W1                           | W3                   | W5                   | W7                   |                      |
|                                         |                                      | D1                           | D15                  | D28                  | D43                  |                      |
|                                         |                                      | Prior to<br>infusion         | Prior to<br>infusion | Prior to<br>infusion | Prior to<br>infusion |                      |
| Blood and plasma<br>sample <sup>a</sup> | X                                    |                              |                      |                      |                      | X                    |
| Tumor Tissue <sup>b</sup>               | X                                    |                              |                      |                      |                      |                      |

2282

2283

2284

a Blood samples will be collected from all subjects prior to infusion on Day1 (Week 1; Baseline samples for soluble factors may also be collected at Screening, instead of on Day 1 prior to dosing) and at progression.

2285

B Tumor Tissue when availble

2286

2287

2288

2289

2290

2291

2292

2293

2294

2295

**Appendix II Eastern Cooperative Oncology Group Performance Status**

**Studio CAVE (Cetuximab-AVElumab) mCRC**

2296

| ECOG PS <sup>a</sup> |                                                                                                                                                                  |
|----------------------|------------------------------------------------------------------------------------------------------------------------------------------------------------------|
| Grade                | ECOG                                                                                                                                                             |
| 0                    | Fully active, able to carry on all pre-disease performance without restriction                                                                                   |
| 1                    | Restricted in physically strenuous activity but ambulatory and able to carry out work of a light or sedentary nature, for example, light house work, office work |
| 2                    | Ambulatory and capable of all self-care, but unable to carry out any work activities; up and about > 50% of waking hours                                         |
| 3                    | Capable of only limited self-care, confined to bed or chair > 50% of waking hours                                                                                |
| 4                    | Completely disabled; cannot carry on any self-care; totally confined to bed or chair                                                                             |
| 5                    | Dead                                                                                                                                                             |

2297

2298  
2299

<sup>a</sup>Oken MM, Creech RH, Tormey DC, Horton J, Davis TE, McFadden ET, Carbone PP. Toxicity and Response Criteria of the Eastern Cooperative Oncology Group. Am J Clin Oncol 1982;5: 649-55 (40).
