# Supplementary material
Source: PubMed Central journal article supplement (PMC8531995)
Supplement: jamaoncol-e212915-s003.pdf [file jamaoncol-e212915-s003.pdf]

# Data Sharing Statement

Martinelli. Cetuximab Rechallenge Plus Avelumab in Pretreated Patients With RAS Wild-Type Metastatic Colorectal Cancer. *JAMA Oncol.* Published August 12, 2021. doi:10.1001/jamaoncol.2021.2915

## Data

**Data available:** Yes

**Data types:** Deidentified participant data

**How to access data:** Researchers can request access to deidentified individual patient-level data through the clinical study data request "Vanvitelli" platform. Data will be provided with an accompanying dictionary for the correct definition of each item reported in the clinical study documentation. If necessary, further details on sharing clinical information will be available by sending an email to [trialsclinici@unicampania.it](mailto:trialsclinici@unicampania.it) and to the corresponding author.

**When available:** With publication

## Supporting Documents

**Document types:** None

## Additional Information

**Who can access the data:** researchers whose proposed use of the data has been approved

**Types of analyses:** for a specified purpose

**Mechanisms of data availability:** with investigator support
